# Supplementary material for: Phylogenetic relationship and comparative analysis of the main Bupleuri Radix species in China
Source: PeerJ. 2023 Apr 14;11:e15157. doi: 10.7717/peerj.15157 (PMC10108860; doi:10.7717/peerj.15157)
Supplement: Supplemental Information 1 [file peerj-11-15157-s001.xls]

## Sheet: Sheet1
Table S1. The information of 8 Bupleurum individuals sequenced in the study.
Taxa	Code	Genbank accession Number	SRA accession Number	Herbarium accession
B. chinense	BC01	ON553227	SRR19543193	XSYH2019001
B. chinense	BC02	ON553226	SRR19543230	XSYH2019002
B. chinense	BC03	ON553228	SRR19543546	XSYH2019003
B. chinense	BC04	ON553229	SRR19543229	XSYH2019004
B. chinense	BC05	ON553230	SRR19543545	XSYH2019005
B. scorzonerifolium	BS01	ON553233	SRR19543170	XSYH2019006
B. scorzonerifolium	BS02	ON553232	SRR19543543	XSYH2019007
B. bicaule	BB01	ON553231	SRR19543825	XSYH2019008
