# Supplementary material for: Phylogenetic relationship and comparative analysis of the main Bupleuri Radix species in China
Source: PeerJ. 2023 Apr 14;11:e15157. doi: 10.7717/peerj.15157 (PMC10108860; doi:10.7717/peerj.15157)
Supplement: Supplemental Information 2 [file peerj-11-15157-s002.xls]

## Sheet: Sheet1
Table S2. List of genes encoded in the plastomes in the study.
Gene Category	Gene group	Genes
self-replication	Ribosomal RNAs	rrn4.5(×2); rrn5 (×2); rrn16 (×2); rrn23 (× 2)
	Transfer RNAs	trnA-UGC (×2)a; trnC-GCA; trnD-GUC; trnE-UUC; trnF-GAA; trnfM-CAU; trnG-GCC; trnG-UCC a ; trnH-GUG; trnI-CAU (× 2); trnI-GAU (× 2) a; trnK-UUU a ; trnL-CAA(× 2); trnL-UAA a ; trnL-UAG; trnM-CAU; trnN-GUU (× 2); trnP-UGG; trnQ-UUG; trnR-ACG (× 2); trnR-UCU; trnS-GCU; trnS-GGA; trnS-UGA; trnT-GGU; trnT-UGU; trnV-GAC (× 2); trnV-UAC a ; trnW-CCA; trnY-GUA
	Small subunit of ribosomal proteins	rps2; rps3; rps4; rps7 (×2); rps8; rps11; rps12 (× 2)b; rps14; rps15; rps16 a ; rps18; rps19
	DNA-dependent RNA polymerase	rpoA; rpoB; rpoC1 a; rpoC2
	Large subunit of ribosome	rpl2 (×2) a; rpl14; rpl16 a ; rpl20; rpl22; rpl23 (× 2); rpl33; rpl32; rpl36
Photosynthesis	Large subunit of rubisco	rbcL
	NADH dehydrogenase	ndhA a; ndhB (×2) a; ndhC; ndhD; ndhE; ndhF; ndhG; ndhH; ndhI; ndhJ; ndhK
	Subunits of photosystem I	psaA; psaB; psaC; psaI; psaJ; ycf3 b ; ycf4
	Subunits of photosystem II	psbA; psbB; psbC; psbD; psbE; psbF; psbH; psbI; psbJ; psbK; psbL; psbM; psbN; psbT; psbZ
	Subunits of ATP synthase	atpA; atpB; atpE; atpF a ; atpH; atpI
	Subunits of cytochrome b/f complex	petN; petA; petL; petG; petB a; petD a
Other genes	Subunits of Acetyl-CoAcarboxylase	accD
	Envelop membrane protein	cemA
	C-type cytochrome synthesis gene	ccsA
	ATP-dependent protease subunit P	clpP b
	Maturase	matK
	Translational initiation factor	infA
	Hypothetical chloroplast reading frames	ycf1; ycf2 (×2)
	Pseudogenes	ycf1 c; rps19
	Total	113 single-copy genes, 132 in total
(×2) indicates two gene copies in IRs; a and b indicate one- and two-intron containing genes, respectively; c indicates incomplete copy gene.
