# Supplementary material for: Phylogenetic relationship and comparative analysis of the main Bupleuri Radix species in China
Source: PeerJ. 2023 Apr 14;11:e15157. doi: 10.7717/peerj.15157 (PMC10108860; doi:10.7717/peerj.15157)
Supplement: Supplemental Information 3 [file peerj-11-15157-s003.xls]

## Sheet: Sheet1
Table S3. The numbers of SNPs and InDels across Bupleurum plastomes with BC01 as reference.
	SNPs	InDels
BC02 vs. BC01	102	63
BC03 vs. BC01	70	39
BC04 vs. BC01	132	72
BC05 vs. BC01	303	114
BS01 vs. BC01	740	219
BS02 vs. BC01	733	216
BB01 vs. BC01	730	216
BF01 vs. BC01	420	163
BM01 vs. BC01	2091	340
