# Supplementary material for: Phylogenetic relationship and comparative analysis of the main Bupleuri Radix species in China
Source: PeerJ. 2023 Apr 14;11:e15157. doi: 10.7717/peerj.15157 (PMC10108860; doi:10.7717/peerj.15157)
Supplement: Supplemental Information 4 [file peerj-11-15157-s004.xls]

## Sheet: Sheet1
Table S4. cpSSRs of five Bupleurum species.
ID	SSR type	SSR	size	start	end	anno
BC01	p1	(A)13	13	1661	1673	IGS(psbA,trnK-UUU)
BC01	p1	(A)16	16	3870	3885	trnK-UUU(intron)
BC01	p1	(A)12	12	4421	4432	IGS(trnK-UUU,rps16)
BC01	p3	(GAA)4	12	4834	4845	IGS(trnK-UUU,rps16)
BC01	p1	(T)10	10	5572	5581	rps16(intron)
BC01	p1	(T)11	11	5672	5682	rps16(intron)
BC01	p1	(A)11	11	6520	6530	IGS(rps16,trnQ-UUG)
BC01	p1	(T)10	10	6566	6575	IGS(rps16,trnQ-UUG)
BC01	p3	(ATT)4	12	9632	9643	IGS(trnS-GCU,trnG-UCC)
BC01	p1	(A)11	11	12437	12447	IGS(atpA,atpF)
BC01	p1	(T)12	12	13140	13151	atpF(intron)
BC01	p1	(A)10	10	16958	16967	IGS(rps2,rpoC2)
BC01	p4	(AAAT)3	12	16985	16996	IGS(rps2,rpoC2)
BC01	p1	(T)15	15	17084	17098	IGS(rps2,rpoC2)
BC01	p1	(T)10	10	19203	19212	rpoC2
BC01	p4	(ATAA)3	12	23409	23420	rpoC1(intron)
BC01	p1	(T)12	12	26962	26973	rpoB
BC01	p4	(AGAT)3	12	28224	28235	IGS(rpoB,trnC-GCA)
BC01	p2	(AT)7	14	30594	30607	IGS(petN,psbM)
BC01	p3	(GAT)4	12	33047	33058	IGS(trnT-GGU,psbD)
BC01	p1	(T)11	11	33257	33267	IGS(trnT-GGU,psbD)
BC01	p2	(AT)5	10	33480	33489	IGS(trnT-GGU,psbD)
BC01	p1	(A)10	10	36705	36714	IGS(psbC,trnS-UGA)
BC01	p1	(A)15	15	43453	43467	IGS(psaA,ycf3)
BC01	p1	(T)10	10	45272	45281	ycf3(intron)
BC01	p2	(TA)5	10	47585	47594	IGS(rps4,trnT-UGU)
BC01	p2	(AT)7	14	49613	49626	IGS(trnF-GAA,ndhJ)
BC01	p2	(AT)5	10	50263	50272	ndhJ
BC01	p2	(TA)5	10	52003	52012	IGS(ndhC,trnV-UAC)
BC01	p1	(T)10	10	55739	55748	atpB
BC01	p3	(AAT)5	15	60893	60907	IGS(accD,psaI)
BC01	p1	(T)11	11	61138	61148	IGS(psaI,ycf4)
BC01	p2	(AT)9	18	65081	65098	IGS(petA,psbJ)
BC01	p1	(T)10	10	66980	66989	IGS(psbE,petL)
BC01	p5	(TTTAA)3	15	68149	68163	IGS(trnP-UGG,psaJ)
BC01	p5	(ATTTC)3	15	71271	71285	IGS(rps12,clpP)
BC01	p2	(AT)6	12	71643	71654	clpP(intron)
BC01	p1	(A)10	10	71743	71752	clpP(intron)
BC01	p1	(A)10	10	72562	72571	clpP(intron)
BC01	p1	(T)10	10	79574	79583	rpoA
BC01	p1	(T)20	20	81997	82016	IGS(rps8,rpl14)
BC01	p2	(AT)7	14	85310	85323	IGS(rpl22,rps19)
BC01	p1	(T)12	12	99651	99662	IGS(rps12,trnV-GAC)
BC01	p3	(TAA)4	12	100744	100755	IGS(rps12,trnV-GAC)
BC01	p4	(AGGT)3	12	106930	106941	rrn23
BC01	p1	(T)10	10	109095	109104	IGS(trnR-ACG,trnN-GUU)
BC01	p1	(T)10	10	111087	111096	IGS(trnN-GUU,ndhF)
BC01	p1	(A)10	10	111426	111435	IGS(trnN-GUU,ndhF)
BC01	p3	(ATT)4	12	113465	113476	ndhF
BC01	p1	(T)10	10	114374	114383	IGS(ndhF,rpl32)
BC01	p1	(A)10	10	116041	116050	IGS(rpl32,trnL-UAG)
BC01	p1	(T)10	10	125311	125320	rps15
BC01	p2	(AT)5	10	125370	125379	IGS(rps15,ycf1)
BC01	p1	(T)11	11	128461	128471	ycf1
BC01	p1	(T)10	10	129776	129785	ycf1
BC01	p1	(A)10	10	130115	130124	ycf1
BC01	p1	(A)10	10	132107	132116	IGS(trnN-GUU,trnR-ACG)
BC01	p4	(CTAC)3	12	134268	134279	rrn23
BC01	p3	(TAT)4	12	140454	140465	IGS(trnV-GAC,rps7)
BC01	p1	(A)12	12	141549	141560	IGS(trnV-GAC,rps7)
BC02	p1	(T)10	10	146	155	IGS(trnH-GUG,psbA)
BC02	p1	(A)10	10	268	277	IGS(trnH-GUG,psbA)
BC02	p1	(A)14	14	1666	1679	IGS(psbA,trnK-UUU)
BC02	p1	(A)12	12	3877	3888	trnK-UUU(intron)
BC02	p1	(A)12	12	4423	4434	IGS(trnK-UUU,rps16)
BC02	p5	(ATATT)3	15	4756	4770	IGS(trnK-UUU,rps16)
BC02	p3	(GAA)4	12	4841	4852	IGS(trnK-UUU,rps16)
BC02	p1	(T)12	12	5678	5689	rps16(intron)
BC02	p1	(A)10	10	6527	6536	IGS(rps16,trnQ-UUG)
BC02	p1	(T)12	12	6572	6583	IGS(rps16,trnQ-UUG)
BC02	p1	(T)11	11	9576	9586	IGS(trnS-GCU,trnG-UCC)
BC02	p3	(ATT)4	12	9670	9681	IGS(trnS-GCU,trnG-UCC)
BC02	p1	(A)12	12	12475	12486	IGS(atpA,atpF)
BC02	p1	(T)12	12	13179	13190	atpF(intron)
BC02	p1	(A)10	10	16997	17006	IGS(rps2,rpoC2)
BC02	p4	(AAAT)3	12	17024	17035	IGS(rps2,rpoC2)
BC02	p1	(T)15	15	17123	17137	IGS(rps2,rpoC2)
BC02	p5	(TATCC)3	15	17216	17230	IGS(rps2,rpoC2)
BC02	p1	(T)10	10	19246	19255	rpoC2
BC02	p4	(ATAA)3	12	23453	23464	rpoC1(intron)
BC02	p1	(T)12	12	27006	27017	rpoB
BC02	p4	(AGAT)3	12	28268	28279	IGS(rpoB,trnC-GCA)
BC02	p2	(AT)7	14	30625	30638	IGS(petN,psbM)
BC02	p3	(GAT)4	12	33078	33089	IGS(trnT-GGU,psbD)
BC02	p1	(T)13	13	33288	33300	IGS(trnT-GGU,psbD)
BC02	p2	(AT)7	14	33513	33526	IGS(trnT-GGU,psbD)
BC02	p1	(A)10	10	36742	36751	IGS(psbC,trnS-UGA)
BC02	p1	(A)15	15	43471	43485	IGS(psaA,ycf3)
BC02	p2	(TA)5	10	47630	47639	IGS(rps4,trnT-UGU)
BC02	p1	(T)10	10	49621	49630	IGS(trnF-GAA,ndhJ)
BC02	p2	(AT)7	14	49657	49670	IGS(trnF-GAA,ndhJ)
BC02	p2	(AT)5	10	50308	50317	ndhJ
BC02	p2	(TA)5	10	52048	52057	IGS(ndhC,trnV-UAC)
BC02	p1	(T)10	10	55782	55791	atpB
BC02	p3	(AAT)5	15	60881	60895	IGS(accD,psaI)
BC02	p1	(T)10	10	61126	61135	IGS(psaI,ycf4)
BC02	p2	(AT)9	18	65052	65069	IGS(petA,psbJ)
BC02	p1	(T)10	10	66950	66959	IGS(psbE,petL)
BC02	p5	(ATTTC)3	15	71236	71250	IGS(rps12,clpP)
BC02	p1	(A)10	10	71700	71709	clpP(intron)
BC02	p1	(T)10	10	73452	73461	IGS(clpP,psbB)
BC02	p1	(A)10	10	73508	73517	IGS(clpP,psbB)
BC02	p1	(T)10	10	79523	79532	rpoA
BC02	p1	(T)14	14	81953	81966	IGS(rps8,rpl14)
BC02	p1	(T)11	11	83655	83665	rpl16(intron)
BC02	p2	(AT)7	14	85264	85277	IGS(rpl22,rps19)
BC02	p1	(T)12	12	99592	99603	IGS(rps12,trnV-GAC)
BC02	p3	(TAA)4	12	100685	100696	IGS(rps12,trnV-GAC)
BC02	p4	(AGGT)3	12	106871	106882	rrn23
BC02	p1	(T)12	12	109036	109047	IGS(trnR-ACG,trnN-GUU)
BC02	p1	(T)10	10	111030	111039	IGS(trnN-GUU,ndhF)
BC02	p1	(A)10	10	111369	111378	IGS(trnN-GUU,ndhF)
BC02	p3	(ATT)4	12	113408	113419	ndhF
BC02	p1	(T)10	10	114315	114324	IGS(ndhF,rpl32)
BC02	p1	(A)10	10	115984	115993	IGS(rpl32,trnL-UAG)
BC02	p1	(T)10	10	125254	125263	rps15
BC02	p2	(AT)5	10	125307	125316	IGS(rps15,ycf1)
BC02	p1	(T)11	11	128392	128402	ycf1
BC02	p1	(T)10	10	129707	129716	ycf1
BC02	p1	(A)10	10	130046	130055	ycf1
BC02	p1	(A)12	12	132038	132049	IGS(trnN-GUU,trnR-ACG)
BC02	p4	(CTAC)3	12	134201	134212	rrn23
BC02	p3	(TAT)4	12	140387	140398	IGS(trnV-GAC,rps7)
BC02	p1	(A)12	12	141482	141493	IGS(trnV-GAC,rps7)
BC03	p1	(A)13	13	1663	1675	IGS(psbA,trnK-UUU)
BC03	p1	(A)16	16	3873	3888	trnK-UUU(intron)
BC03	p1	(A)12	12	4420	4431	IGS(trnK-UUU,rps16)
BC03	p3	(GAA)4	12	4833	4844	IGS(trnK-UUU,rps16)
BC03	p1	(T)10	10	5571	5580	rps16(intron)
BC03	p1	(T)10	10	5671	5680	rps16(intron)
BC03	p1	(A)10	10	6519	6528	IGS(rps16,trnQ-UUG)
BC03	p1	(T)10	10	6564	6573	IGS(rps16,trnQ-UUG)
BC03	p3	(ATT)4	12	9635	9646	IGS(trnS-GCU,trnG-UCC)
BC03	p1	(A)11	11	12440	12450	IGS(atpA,atpF)
BC03	p1	(T)11	11	13143	13153	atpF(intron)
BC03	p1	(T)10	10	16950	16959	IGS(rps2,rpoC2)
BC03	p4	(AAAT)3	12	16987	16998	IGS(rps2,rpoC2)
BC03	p1	(T)14	14	17086	17099	IGS(rps2,rpoC2)
BC03	p1	(T)10	10	19204	19213	rpoC2
BC03	p4	(ATAA)3	12	23410	23421	rpoC1(intron)
BC03	p1	(T)12	12	26963	26974	rpoB
BC03	p4	(AGAT)3	12	28225	28236	IGS(rpoB,trnC-GCA)
BC03	p2	(AT)7	14	30580	30593	IGS(petN,psbM)
BC03	p3	(GAT)4	12	33034	33045	IGS(trnT-GGU,psbD)
BC03	p1	(T)11	11	33244	33254	IGS(trnT-GGU,psbD)
BC03	p2	(AT)7	14	33467	33480	IGS(trnT-GGU,psbD)
BC03	p1	(A)13	13	36696	36708	IGS(psbC,trnS-UGA)
BC03	p1	(A)16	16	43439	43454	IGS(psaA,ycf3)
BC03	p2	(TA)5	10	47571	47580	IGS(rps4,trnT-UGU)
BC03	p2	(AT)7	14	49599	49612	IGS(trnF-GAA,ndhJ)
BC03	p2	(AT)5	10	50250	50259	ndhJ
BC03	p2	(TA)8	16	51990	52005	IGS(ndhC,trnV-UAC)
BC03	p1	(T)10	10	55730	55739	atpB
BC03	p3	(AAT)5	15	60823	60837	IGS(accD,psaI)
BC03	p1	(T)11	11	61062	61072	IGS(psaI,ycf4)
BC03	p2	(AT)9	18	65005	65022	IGS(petA,psbJ)
BC03	p1	(T)10	10	66904	66913	IGS(psbE,petL)
BC03	p5	(ATTTC)3	15	71190	71204	IGS(rps12,clpP)
BC03	p1	(A)10	10	76271	76280	IGS(psbH,petB)
BC03	p1	(T)15	15	79483	79497	rpoA
BC03	p1	(T)14	14	81912	81925	IGS(rps8,rpl14)
BC03	p1	(T)10	10	83613	83622	rpl16(intron)
BC03	p2	(AT)7	14	85220	85233	IGS(rpl22,rps19)
BC03	p1	(G)10	10	94476	94485	IGS(ycf2,trnL-CAA)
BC03	p1	(T)12	12	99555	99566	IGS(rps12,trnV-GAC)
BC03	p3	(TAA)4	12	100648	100659	IGS(rps12,trnV-GAC)
BC03	p4	(AGGT)3	12	106833	106844	rrn23
BC03	p1	(T)11	11	109030	109040	IGS(trnR-ACG,trnN-GUU)
BC03	p1	(T)10	10	111023	111032	IGS(trnN-GUU,ndhF)
BC03	p1	(A)10	10	111362	111371	IGS(trnN-GUU,ndhF)
BC03	p3	(ATT)4	12	113401	113412	ndhF
BC03	p1	(T)10	10	114309	114318	IGS(ndhF,rpl32)
BC03	p1	(C)10	10	115968	115977	IGS(rpl32,trnL-UAG)
BC03	p1	(T)10	10	125245	125254	rps15
BC03	p2	(AT)5	10	125298	125307	IGS(rps15,ycf1)
BC03	p1	(T)11	11	128388	128398	ycf1
BC03	p1	(T)10	10	129703	129712	ycf1
BC03	p1	(A)10	10	130042	130051	ycf1
BC03	p1	(A)11	11	132034	132044	IGS(trnN-GUU,trnR-ACG)
BC03	p4	(CTAC)3	12	134228	134239	rrn23
BC03	p3	(TAT)4	12	140413	140424	IGS(trnV-GAC,rps7)
BC03	p1	(A)12	12	141508	141519	IGS(trnV-GAC,rps7)
BC03	p1	(C)10	10	146589	146598	IGS(trnL-CAA,ycf2)
BC04	p1	(A)14	14	1664	1677	IGS(psbA,trnK-UUU)
BC04	p1	(A)14	14	3875	3888	trnK-UUU(intron)
BC04	p1	(A)12	12	4425	4436	IGS(trnK-UUU,rps16)
BC04	p3	(GAA)4	12	4838	4849	IGS(trnK-UUU,rps16)
BC04	p1	(T)11	11	5675	5685	rps16(intron)
BC04	p1	(A)11	11	6524	6534	IGS(rps16,trnQ-UUG)
BC04	p1	(T)10	10	6570	6579	IGS(rps16,trnQ-UUG)
BC04	p3	(ATT)4	12	9635	9646	IGS(trnS-GCU,trnG-UCC)
BC04	p1	(A)10	10	12449	12458	IGS(atpA,atpF)
BC04	p1	(T)11	11	13151	13161	atpF(intron)
BC04	p1	(A)10	10	16959	16968	IGS(rps2,rpoC2)
BC04	p4	(AAAT)3	12	16986	16997	IGS(rps2,rpoC2)
BC04	p1	(T)14	14	17085	17098	IGS(rps2,rpoC2)
BC04	p5	(TATCC)3	15	17177	17191	IGS(rps2,rpoC2)
BC04	p1	(T)10	10	19207	19216	rpoC2
BC04	p1	(C)11	11	23194	23204	rpoC1(intron)
BC04	p4	(ATAA)3	12	23416	23427	rpoC1(intron)
BC04	p1	(T)13	13	26975	26987	rpoB
BC04	p4	(AGAT)3	12	28237	28248	IGS(rpoB,trnC-GCA)
BC04	p2	(AT)8	16	30579	30594	IGS(petN,psbM)
BC04	p3	(GAT)4	12	32997	33008	IGS(trnT-GGU,psbD)
BC04	p1	(T)10	10	33207	33216	IGS(trnT-GGU,psbD)
BC04	p2	(AT)9	18	33420	33437	IGS(trnT-GGU,psbD)
BC04	p1	(A)14	14	43380	43393	IGS(psaA,ycf3)
BC04	p2	(TA)5	10	47538	47547	IGS(rps4,trnT-UGU)
BC04	p2	(AT)7	14	49566	49579	IGS(trnF-GAA,ndhJ)
BC04	p2	(AT)5	10	50217	50226	ndhJ
BC04	p1	(T)13	13	51881	51893	IGS(ndhC,trnV-UAC)
BC04	p2	(AT)8	16	51965	51980	IGS(ndhC,trnV-UAC)
BC04	p1	(T)10	10	55704	55713	atpB
BC04	p3	(AAT)5	15	60803	60817	IGS(accD,psaI)
BC04	p2	(AT)7	14	64973	64986	IGS(petA,psbJ)
BC04	p1	(T)10	10	66868	66877	IGS(psbE,petL)
BC04	p1	(T)14	14	68815	68828	IGS(psaJ,rpl33)
BC04	p1	(T)10	10	70845	70854	IGS(rpl20,rps12)
BC04	p5	(ATTTC)4	20	71154	71173	IGS(rps12,clpP)
BC04	p1	(A)10	10	71623	71632	clpP(intron)
BC04	p1	(T)10	10	79444	79453	rpoA
BC04	p1	(T)14	14	81873	81886	IGS(rps8,rpl14)
BC04	p1	(T)11	11	83575	83585	rpl16(intron)
BC04	p2	(AT)9	18	85184	85201	IGS(rpl22,rps19)
BC04	p1	(T)10	10	85514	85523	IGS(rps19,rpl2)
BC04	p1	(T)12	12	99536	99547	IGS(rps12,trnV-GAC)
BC04	p3	(TAA)4	12	100629	100640	IGS(rps12,trnV-GAC)
BC04	p4	(AGGT)3	12	106815	106826	rrn23
BC04	p1	(T)12	12	108980	108991	IGS(trnR-ACG,trnN-GUU)
BC04	p1	(T)10	10	110974	110983	IGS(trnN-GUU,ndhF)
BC04	p1	(A)10	10	111313	111322	IGS(trnN-GUU,ndhF)
BC04	p3	(ATT)4	12	113348	113359	ndhF
BC04	p1	(T)10	10	114255	114264	IGS(ndhF,rpl32)
BC04	p1	(T)11	11	115109	115119	IGS(ndhF,rpl32)
BC04	p1	(T)10	10	125194	125203	rps15
BC04	p1	(A)12	12	128226	128237	ycf1
BC04	p1	(T)10	10	128331	128340	ycf1
BC04	p1	(T)10	10	129645	129654	ycf1
BC04	p1	(A)10	10	129984	129993	ycf1
BC04	p1	(A)12	12	131976	131987	IGS(trnN-GUU,trnR-ACG)
BC04	p4	(CTAC)3	12	134139	134150	rrn23
BC04	p3	(TAT)4	12	140325	140336	IGS(trnV-GAC,rps7)
BC04	p1	(A)12	12	141420	141431	IGS(trnV-GAC,rps7)
BC04	p1	(A)10	10	155444	155453	IGS(rpl2,end)
BC05	p1	(A)17	17	1662	1678	IGS(psbA,trnK-UUU)
BC05	p1	(A)14	14	3869	3882	trnK-UUU(intron)
BC05	p1	(A)15	15	4417	4431	IGS(trnK-UUU,rps16)
BC05	p3	(GAA)4	12	4845	4856	IGS(trnK-UUU,rps16)
BC05	p1	(T)10	10	5681	5690	rps16(intron)
BC05	p1	(A)11	11	6529	6539	IGS(rps16,trnQ-UUG)
BC05	p1	(A)10	10	7484	7493	IGS(rps16,trnQ-UUG)
BC05	p3	(ATT)4	12	9631	9642	IGS(trnS-GCU,trnG-UCC)
BC05	p1	(A)12	12	12437	12448	IGS(atpA,atpF)
BC05	p1	(T)11	11	13141	13151	atpF(intron)
BC05	p1	(A)11	11	13860	13870	IGS(atpF,atpH)
BC05	p1	(T)10	10	16960	16969	IGS(rps2,rpoC2)
BC05	p4	(AAAT)3	12	16997	17008	IGS(rps2,rpoC2)
BC05	p1	(T)11	11	17096	17106	IGS(rps2,rpoC2)
BC05	p1	(T)10	10	19205	19214	rpoC2
BC05	p4	(ATAA)3	12	23412	23423	rpoC1(intron)
BC05	p1	(T)12	12	26959	26970	rpoB
BC05	p4	(AGAT)3	12	28221	28232	IGS(rpoB,trnC-GCA)
BC05	p1	(T)11	11	30770	30780	IGS(petN,psbM)
BC05	p3	(GAT)4	12	33014	33025	IGS(trnT-GGU,psbD)
BC05	p1	(T)13	13	33250	33262	IGS(trnT-GGU,psbD)
BC05	p2	(AT)5	10	33475	33484	IGS(trnT-GGU,psbD)
BC05	p1	(A)12	12	36696	36707	IGS(psbC,trnS-UGA)
BC05	p1	(A)11	11	43433	43443	IGS(psaA,ycf3)
BC05	p1	(T)10	10	43456	43465	ycf3
BC05	p2	(TA)8	16	47543	47558	IGS(rps4,trnT-UGU)
BC05	p2	(AT)5	10	50219	50228	ndhJ
BC05	p2	(TA)6	12	51959	51970	IGS(ndhC,trnV-UAC)
BC05	p3	(TAA)4	12	53410	53421	IGS(trnV-UAC,trnM-CAU)
BC05	p1	(T)10	10	55709	55718	atpB
BC05	p3	(AAT)5	15	60819	60833	IGS(accD,psaI)
BC05	p1	(T)10	10	61064	61073	IGS(psaI,ycf4)
BC05	p1	(A)12	12	62541	62552	cemA
BC05	p2	(AT)6	12	64975	64986	IGS(petA,psbJ)
BC05	p2	(AT)7	14	64989	65002	IGS(petA,psbJ)
BC05	p1	(T)11	11	70853	70863	IGS(rpl20,rps12)
BC05	p1	(A)12	12	76229	76240	IGS(psbH,petB)
BC05	p1	(T)10	10	79460	79469	rpoA
BC05	p1	(T)14	14	81889	81902	IGS(rps8,rpl14)
BC05	p1	(T)11	11	83596	83606	rpl16(intron)
BC05	p2	(AT)8	16	85206	85221	IGS(rpl22,rps19)
BC05	p1	(T)11	11	99557	99567	IGS(rps12,trnV-GAC)
BC05	p3	(TAA)4	12	100649	100660	IGS(rps12,trnV-GAC)
BC05	p4	(AGGT)3	12	106835	106846	rrn23
BC05	p1	(T)10	10	109000	109009	IGS(trnR-ACG,trnN-GUU)
BC05	p1	(T)10	10	110992	111001	IGS(trnN-GUU,ndhF)
BC05	p1	(A)10	10	111331	111340	IGS(trnN-GUU,ndhF)
BC05	p2	(AT)5	10	111778	111787	IGS(trnN-GUU,ndhF)
BC05	p3	(ATT)4	12	113378	113389	ndhF
BC05	p1	(A)11	11	115953	115963	IGS(rpl32,trnL-UAG)
BC05	p1	(T)10	10	128369	128378	ycf1
BC05	p1	(T)10	10	129683	129692	ycf1
BC05	p1	(A)10	10	130022	130031	ycf1
BC05	p1	(A)10	10	132014	132023	IGS(trnN-GUU,trnR-ACG)
BC05	p4	(CTAC)3	12	134175	134186	rrn23
BC05	p3	(TAT)4	12	140361	140372	IGS(trnV-GAC,rps7)
BC05	p1	(A)11	11	141456	141466	IGS(trnV-GAC,rps7)
BS01	p1	(A)10	10	263	272	IGS(trnH-GUG,psbA)
BS01	p1	(A)15	15	1661	1675	IGS(psbA,trnK-UUU)
BS01	p1	(A)11	11	1929	1939	trnK-UUU(intron)
BS01	p1	(A)15	15	3868	3882	trnK-UUU(intron)
BS01	p3	(GAA)4	12	4877	4888	IGS(trnK-UUU,rps16)
BS01	p1	(T)11	11	5693	5703	rps16(intron)
BS01	p5	(TAAGC)3	15	7167	7181	IGS(rps16,trnQ-UUG)
BS01	p1	(T)10	10	9264	9273	IGS(trnS-GCU,trnG-UCC)
BS01	p1	(T)11	11	9676	9686	IGS(trnS-GCU,trnG-UCC)
BS01	p1	(A)15	15	12526	12540	IGS(atpA,atpF)
BS01	p1	(T)11	11	13227	13237	atpF(intron)
BS01	p1	(A)11	11	17050	17060	IGS(rps2,rpoC2)
BS01	p4	(AAAT)3	12	17078	17089	IGS(rps2,rpoC2)
BS01	p1	(T)10	10	19299	19308	rpoC2
BS01	p1	(T)12	12	27039	27050	rpoB
BS01	p4	(AGAT)3	12	28310	28321	IGS(rpoB,trnC-GCA)
BS01	p2	(AT)5	10	29719	29728	IGS(trnC-GCA,petN)
BS01	p3	(GAT)4	12	33127	33138	IGS(trnT-GGU,psbD)
BS01	p1	(T)10	10	33327	33336	IGS(trnT-GGU,psbD)
BS01	p2	(AT)7	14	33549	33562	IGS(trnT-GGU,psbD)
BS01	p2	(TA)5	10	47633	47642	IGS(rps4,trnT-UGU)
BS01	p1	(T)14	14	49228	49241	IGS(trnL-UAA,trnF-GAA)
BS01	p2	(AT)7	14	49685	49698	IGS(trnF-GAA,ndhJ)
BS01	p2	(AT)5	10	50334	50343	ndhJ
BS01	p1	(T)11	11	51271	51281	IGS(ndhK,ndhC)
BS01	p2	(TA)6	12	52067	52078	IGS(ndhC,trnV-UAC)
BS01	p1	(T)10	10	55829	55838	atpB
BS01	p1	(A)12	12	62642	62653	cemA
BS01	p2	(AT)7	14	65084	65097	IGS(petA,psbJ)
BS01	p1	(T)15	15	66987	67001	IGS(psbE,petL)
BS01	p1	(A)11	11	71937	71947	clpP(intron)
BS01	p1	(A)11	11	72591	72601	clpP(intron)
BS01	p1	(T)10	10	73525	73534	IGS(clpP,psbB)
BS01	p1	(T)10	10	76393	76402	IGS(psbH,petB)
BS01	p1	(T)10	10	79609	79618	rpoA
BS01	p1	(T)15	15	82042	82056	IGS(rps8,rpl14)
BS01	p1	(T)10	10	83748	83757	rpl16(intron)
BS01	p1	(T)10	10	84135	84144	IGS(rpl16,rps3)
BS01	p2	(AT)5	10	85360	85369	IGS(rpl22,rps19)
BS01	p1	(T)10	10	85682	85691	IGS(rps19,rpl2)
BS01	p1	(T)11	11	99693	99703	IGS(rps12,trnV-GAC)
BS01	p3	(TAA)4	12	100786	100797	IGS(rps12,trnV-GAC)
BS01	p4	(AGGT)3	12	106972	106983	rrn23
BS01	p1	(T)11	11	109137	109147	IGS(trnR-ACG,trnN-GUU)
BS01	p1	(T)10	10	111150	111159	IGS(trnN-GUU,ndhF)
BS01	p1	(A)10	10	111489	111498	IGS(trnN-GUU,ndhF)
BS01	p3	(ATT)4	12	113517	113528	ndhF
BS01	p1	(T)10	10	114427	114436	IGS(ndhF,rpl32)
BS01	p2	(TA)6	12	115178	115189	IGS(ndhF,rpl32)
BS01	p2	(AT)6	12	120174	120185	IGS(ndhE,ndhG)
BS01	p1	(T)10	10	125462	125471	rps15
BS01	p2	(TA)5	10	125852	125861	IGS(rps15,ycf1)
BS01	p1	(T)15	15	127958	127972	ycf1
BS01	p1	(T)13	13	128605	128617	ycf1
BS01	p1	(T)10	10	129928	129937	ycf1
BS01	p1	(A)10	10	130267	130276	ycf1
BS01	p1	(A)11	11	132279	132289	IGS(trnN-GUU,trnR-ACG)
BS01	p4	(CTAC)3	12	134441	134452	rrn23
BS01	p3	(TAT)4	12	140627	140638	IGS(trnV-GAC,rps7)
BS01	p1	(A)11	11	141723	141733	IGS(trnV-GAC,rps7)
BS01	p1	(A)10	10	155735	155744	IGS(rpl2,end)
BS02	p1	(A)20	20	1660	1679	IGS(psbA,trnK-UUU)
BS02	p1	(A)15	15	3870	3884	trnK-UUU(intron)
BS02	p1	(A)10	10	4378	4387	IGS(trnK-UUU,rps16)
BS02	p3	(GAA)4	12	4880	4891	IGS(trnK-UUU,rps16)
BS02	p1	(T)11	11	5696	5706	rps16(intron)
BS02	p5	(TAAGC)3	15	7170	7184	IGS(rps16,trnQ-UUG)
BS02	p1	(T)11	11	9671	9681	IGS(trnS-GCU,trnG-UCC)
BS02	p1	(A)16	16	12521	12536	IGS(atpA,atpF)
BS02	p1	(T)12	12	13223	13234	atpF(intron)
BS02	p1	(A)11	11	17063	17073	IGS(rps2,rpoC2)
BS02	p4	(AAAT)3	12	17091	17102	IGS(rps2,rpoC2)
BS02	p1	(T)10	10	19312	19321	rpoC2
BS02	p1	(T)12	12	27051	27062	rpoB
BS02	p4	(AGAT)3	12	28322	28333	IGS(rpoB,trnC-GCA)
BS02	p2	(AT)5	10	29722	29731	IGS(trnC-GCA,petN)
BS02	p3	(GAT)4	12	33136	33147	IGS(trnT-GGU,psbD)
BS02	p2	(AT)7	14	33556	33569	IGS(trnT-GGU,psbD)
BS02	p1	(A)11	11	33921	33931	IGS(trnT-GGU,psbD)
BS02	p2	(TA)5	10	37016	37025	IGS(trnS-UGA,psbZ)
BS02	p1	(T)10	10	45332	45341	ycf3(intron)
BS02	p2	(TA)5	10	47637	47646	IGS(rps4,trnT-UGU)
BS02	p5	(ATTTA)3	15	48744	48758	trnL-UAA(intron)
BS02	p1	(T)13	13	49237	49249	IGS(trnL-UAA,trnF-GAA)
BS02	p2	(AT)7	14	49693	49706	IGS(trnF-GAA,ndhJ)
BS02	p2	(AT)5	10	50341	50350	ndhJ
BS02	p1	(T)11	11	51278	51288	IGS(ndhK,ndhC)
BS02	p2	(TA)7	14	52074	52087	IGS(ndhC,trnV-UAC)
BS02	p1	(A)12	12	52318	52329	IGS(ndhC,trnV-UAC)
BS02	p1	(T)10	10	55845	55854	atpB
BS02	p1	(A)12	12	62652	62663	cemA
BS02	p2	(AT)7	14	65094	65107	IGS(petA,psbJ)
BS02	p1	(T)16	16	67012	67027	IGS(psbE,petL)
BS02	p1	(A)10	10	71955	71964	clpP(intron)
BS02	p1	(A)10	10	72608	72617	clpP(intron)
BS02	p1	(T)12	12	73541	73552	IGS(clpP,psbB)
BS02	p1	(T)10	10	76411	76420	IGS(psbH,petB)
BS02	p1	(T)10	10	79627	79636	rpoA
BS02	p1	(T)12	12	82061	82072	IGS(rps8,rpl14)
BS02	p1	(T)10	10	82152	82161	IGS(rps8,rpl14)
BS02	p2	(AT)5	10	85375	85384	IGS(rpl22,rps19)
BS02	p1	(T)10	10	85697	85706	IGS(rps19,rpl2)
BS02	p1	(T)11	11	99708	99718	IGS(rps12,trnV-GAC)
BS02	p3	(TAA)4	12	100801	100812	IGS(rps12,trnV-GAC)
BS02	p1	(G)10	10	104905	104914	trnA-UGC(intron)
BS02	p4	(AGGT)3	12	106988	106999	rrn23
BS02	p1	(T)10	10	109153	109162	IGS(trnR-ACG,trnN-GUU)
BS02	p1	(T)10	10	111165	111174	IGS(trnN-GUU,ndhF)
BS02	p3	(ATT)4	12	113532	113543	ndhF
BS02	p1	(T)10	10	114202	114211	IGS(ndhF,rpl32)
BS02	p2	(TA)6	12	115193	115204	IGS(ndhF,rpl32)
BS02	p1	(A)10	10	116188	116197	IGS(rpl32,trnL-UAG)
BS02	p2	(AT)6	12	120192	120203	IGS(ndhE,ndhG)
BS02	p1	(T)10	10	125481	125490	rps15
BS02	p2	(TA)5	10	125872	125881	IGS(rps15,ycf1)
BS02	p1	(T)15	15	127978	127992	ycf1
BS02	p1	(T)13	13	128625	128637	ycf1
BS02	p1	(A)10	10	130287	130296	ycf1
BS02	p1	(A)10	10	132299	132308	IGS(trnN-GUU,trnR-ACG)
BS02	p4	(CTAC)3	12	134460	134471	rrn23
BS02	p1	(C)10	10	136547	136556	trnA-UGC(intron)
BS02	p3	(TAT)4	12	140647	140658	IGS(trnV-GAC,rps7)
BS02	p1	(A)11	11	141743	141753	IGS(trnV-GAC,rps7)
BS02	p1	(A)10	10	155755	155764	IGS(rpl2,end)
BB01	p1	(A)14	14	1660	1673	IGS(psbA,trnK-UUU)
BB01	p1	(A)15	15	3864	3878	trnK-UUU(intron)
BB01	p1	(A)10	10	4372	4381	IGS(trnK-UUU,rps16)
BB01	p3	(GAA)4	12	4874	4885	IGS(trnK-UUU,rps16)
BB01	p1	(T)11	11	5690	5700	rps16(intron)
BB01	p5	(TAAGC)3	15	7164	7178	IGS(rps16,trnQ-UUG)
BB01	p1	(T)11	11	9665	9675	IGS(trnS-GCU,trnG-UCC)
BB01	p1	(A)16	16	12515	12530	IGS(atpA,atpF)
BB01	p1	(T)11	11	13217	13227	atpF(intron)
BB01	p1	(A)11	11	17067	17077	IGS(rps2,rpoC2)
BB01	p4	(AAAT)3	12	17095	17106	IGS(rps2,rpoC2)
BB01	p1	(T)10	10	19316	19325	rpoC2
BB01	p1	(T)12	12	27055	27066	rpoB
BB01	p4	(AGAT)3	12	28326	28337	IGS(rpoB,trnC-GCA)
BB01	p2	(AT)5	10	29726	29735	IGS(trnC-GCA,petN)
BB01	p3	(GAT)4	12	33140	33151	IGS(trnT-GGU,psbD)
BB01	p2	(AT)7	14	33561	33574	IGS(trnT-GGU,psbD)
BB01	p1	(A)11	11	33926	33936	IGS(trnT-GGU,psbD)
BB01	p2	(TA)5	10	37021	37030	IGS(trnS-UGA,psbZ)
BB01	p1	(T)10	10	45337	45346	ycf3(intron)
BB01	p2	(TA)5	10	47642	47651	IGS(rps4,trnT-UGU)
BB01	p5	(ATTTA)3	15	48749	48763	trnL-UAA(intron)
BB01	p1	(T)13	13	49242	49254	IGS(trnL-UAA,trnF-GAA)
BB01	p2	(AT)7	14	49698	49711	IGS(trnF-GAA,ndhJ)
BB01	p2	(AT)5	10	50346	50355	ndhJ
BB01	p1	(T)11	11	51283	51293	IGS(ndhK,ndhC)
BB01	p2	(TA)7	14	52079	52092	IGS(ndhC,trnV-UAC)
BB01	p1	(A)12	12	52323	52334	IGS(ndhC,trnV-UAC)
BB01	p1	(T)10	10	55850	55859	atpB
BB01	p1	(A)12	12	62657	62668	cemA
BB01	p2	(AT)7	14	65099	65112	IGS(petA,psbJ)
BB01	p1	(T)16	16	67017	67032	IGS(psbE,petL)
BB01	p1	(A)10	10	71960	71969	clpP(intron)
BB01	p1	(A)10	10	72613	72622	clpP(intron)
BB01	p1	(T)11	11	73546	73556	IGS(clpP,psbB)
BB01	p1	(T)10	10	79646	79655	rpoA
BB01	p1	(T)12	12	82080	82091	IGS(rps8,rpl14)
BB01	p2	(AT)5	10	85393	85402	IGS(rpl22,rps19)
BB01	p1	(T)10	10	85715	85724	IGS(rps19,rpl2)
BB01	p1	(T)11	11	99726	99736	IGS(rps12,trnV-GAC)
BB01	p3	(TAA)4	12	100819	100830	IGS(rps12,trnV-GAC)
BB01	p1	(G)10	10	104923	104932	trnA-UGC(intron)
BB01	p4	(AGGT)3	12	107006	107017	rrn23
BB01	p1	(T)10	10	109171	109180	IGS(trnR-ACG,trnN-GUU)
BB01	p1	(T)10	10	111183	111192	IGS(trnN-GUU,ndhF)
BB01	p3	(ATT)4	12	113550	113561	ndhF
BB01	p1	(T)10	10	114220	114229	IGS(ndhF,rpl32)
BB01	p2	(TA)6	12	115211	115222	IGS(ndhF,rpl32)
BB01	p1	(A)10	10	116206	116215	IGS(rpl32,trnL-UAG)
BB01	p2	(AT)6	12	120210	120221	IGS(ndhE,ndhG)
BB01	p1	(T)10	10	125499	125508	rps15
BB01	p2	(TA)5	10	125890	125899	IGS(rps15,ycf1)
BB01	p1	(T)15	15	127996	128010	ycf1
BB01	p1	(T)13	13	128643	128655	ycf1
BB01	p1	(A)10	10	130305	130314	ycf1
BB01	p1	(A)10	10	132317	132326	IGS(trnN-GUU,trnR-ACG)
BB01	p4	(CTAC)3	12	134478	134489	rrn23
BB01	p1	(C)10	10	136565	136574	trnA-UGC(intron)
BB01	p3	(TAT)4	12	140665	140676	IGS(trnV-GAC,rps7)
BB01	p1	(A)11	11	141761	141771	IGS(trnV-GAC,rps7)
BB01	p1	(A)10	10	155773	155782	IGS(rpl2,end)
BF01	p1	(A)14	14	1665	1678	IGS(psbA,trnK-UUU)
BF01	p1	(A)12	12	3874	3885	trnK-UUU(intron)
BF01	p1	(A)12	12	4421	4432	IGS(trnK-UUU,rps16)
BF01	p1	(A)11	11	4468	4478	IGS(trnK-UUU,rps16)
BF01	p3	(GAA)4	12	4892	4903	IGS(trnK-UUU,rps16)
BF01	p1	(T)11	11	5733	5743	rps16(intron)
BF01	p1	(A)10	10	7549	7558	IGS(rps16,trnQ-UUG)
BF01	p1	(A)10	10	9165	9174	IGS(trnS-GCU,trnG-UCC)
BF01	p1	(A)13	13	12516	12528	IGS(atpA,atpF)
BF01	p1	(T)10	10	13216	13225	atpF(intron)
BF01	p2	(TA)5	10	13913	13922	IGS(atpF,atpH)
BF01	p1	(A)12	12	17045	17056	IGS(rps2,rpoC2)
BF01	p4	(AAAT)3	12	17074	17085	IGS(rps2,rpoC2)
BF01	p1	(T)17	17	17178	17194	IGS(rps2,rpoC2)
BF01	p1	(T)10	10	19286	19295	rpoC2
BF01	p1	(C)10	10	23273	23282	rpoC1(intron)
BF01	p1	(T)12	12	27024	27035	rpoB
BF01	p4	(AGAT)3	12	28295	28306	IGS(rpoB,trnC-GCA)
BF01	p3	(GAT)4	12	33155	33166	IGS(trnT-GGU,psbD)
BF01	p1	(T)14	14	33363	33376	IGS(trnT-GGU,psbD)
BF01	p2	(AT)7	14	33589	33602	IGS(trnT-GGU,psbD)
BF01	p1	(A)10	10	36811	36820	IGS(psbC,trnS-UGA)
BF01	p2	(TA)6	12	37666	37677	IGS(psbZ,trnG-GCC)
BF01	p1	(A)13	13	43562	43574	IGS(psaA,ycf3)
BF01	p1	(T)11	11	45379	45389	ycf3(intron)
BF01	p1	(A)10	10	46168	46177	IGS(ycf3,trnS-GGA)
BF01	p4	(ATAG)3	12	46665	46676	IGS(trnS-GGA,rps4)
BF01	p2	(TA)5	10	47802	47811	IGS(rps4,trnT-UGU)
BF01	p6	(GGGAAT)3	18	49694	49711	IGS(trnL-UAA,trnF-GAA)
BF01	p2	(AT)6	12	49841	49852	IGS(trnF-GAA,ndhJ)
BF01	p2	(AT)5	10	50489	50498	ndhJ
BF01	p2	(TA)5	10	52223	52232	IGS(ndhC,trnV-UAC)
BF01	p1	(T)10	10	55963	55972	atpB
BF01	p4	(TTAT)3	12	58385	58396	IGS(rbcL,accD)
BF01	p1	(T)10	10	60835	60844	IGS(accD,psaI)
BF01	p1	(A)12	12	62810	62821	cemA
BF01	p2	(AT)7	14	65245	65258	IGS(petA,psbJ)
BF01	p1	(T)10	10	67140	67149	IGS(psbE,petL)
BF01	p1	(T)10	10	71145	71154	IGS(rpl20,rps12)
BF01	p1	(A)10	10	71919	71928	clpP(intron)
BF01	p1	(A)10	10	72740	72749	clpP(intron)
BF01	p1	(T)16	16	73674	73689	IGS(clpP,psbB)
BF01	p1	(A)11	11	78031	78041	IGS(petB,petD)
BF01	p1	(T)10	10	79756	79765	rpoA
BF01	p1	(A)10	10	81301	81310	IGS(rpl36,infA)
BF01	p1	(T)16	16	82180	82195	IGS(rps8,rpl14)
BF01	p1	(T)10	10	83887	83896	rpl16(intron)
BF01	p2	(AT)10	20	85495	85514	IGS(rpl22,rps19)
BF01	p1	(T)10	10	85827	85836	IGS(rps19,rpl2)
BF01	p1	(T)11	11	99838	99848	IGS(rps12,trnV-GAC)
BF01	p3	(TAA)4	12	100931	100942	IGS(rps12,trnV-GAC)
BF01	p1	(G)10	10	105035	105044	trnA-UGC(intron)
BF01	p4	(AGGT)3	12	107118	107129	rrn23
BF01	p1	(T)14	14	109283	109296	IGS(trnR-ACG,trnN-GUU)
BF01	p1	(T)10	10	111279	111288	IGS(trnN-GUU,ndhF)
BF01	p1	(A)10	10	111618	111627	IGS(trnN-GUU,ndhF)
BF01	p3	(ATT)4	12	113669	113680	ndhF
BF01	p1	(T)10	10	114340	114349	IGS(ndhF,rpl32)
BF01	p1	(T)10	10	114582	114591	IGS(ndhF,rpl32)
BF01	p1	(A)10	10	116140	116149	IGS(rpl32,trnL-UAG)
BF01	p1	(A)10	10	116273	116282	IGS(rpl32,trnL-UAG)
BF01	p1	(T)10	10	129988	129997	ycf1
BF01	p1	(A)10	10	130327	130336	ycf1
BF01	p1	(A)14	14	132319	132332	IGS(trnN-GUU,trnR-ACG)
BF01	p4	(CTAC)3	12	134484	134495	rrn23
BF01	p1	(C)10	10	136571	136580	trnA-UGC(intron)
BF01	p3	(TAT)4	12	140671	140682	IGS(trnV-GAC,rps12)
BF01	p1	(A)11	11	141767	141777	IGS(trnV-GAC,rps12)
BF01	p1	(A)10	10	155779	155788	IGS(rpl2,end)
BM	p1	(A)14	14	1650	1663	IGS(psbA,trnK-UUU)
BM	p1	(A)16	16	3848	3863	trnK-UUU(intron)
BM	p3	(GAA)4	12	4757	4768	IGS(trnK-UUU,rps16)
BM	p1	(T)10	10	4787	4796	IGS(trnK-UUU,rps16)
BM	p1	(T)10	10	5598	5607	rps16(intron)
BM	p1	(T)10	10	7042	7051	IGS(rps16,trnQ-UUG)
BM	p1	(A)11	11	9127	9137	IGS(trnS-GCU,trnG-UCC)
BM	p4	(TTAT)3	12	9245	9256	IGS(trnS-GCU,trnG-UCC)
BM	p3	(ATA)5	15	9571	9585	IGS(trnS-GCU,trnG-UCC)
BM	p1	(T)10	10	13013	13022	atpF(intron)
BM	p2	(AT)5	10	13694	13703	IGS(atpF,atpH)
BM	p2	(TA)5	10	13714	13723	IGS(atpF,atpH)
BM	p1	(A)15	15	16861	16875	IGS(rps2,rpoC2)
BM	p4	(AAAT)3	12	16893	16904	IGS(rps2,rpoC2)
BM	p1	(T)10	10	18702	18711	rpoC2
BM	p1	(T)11	11	19099	19109	rpoC2
BM	p2	(AT)5	10	20463	20472	rpoC2
BM	p1	(T)12	12	26842	26853	rpoB
BM	p4	(AGAT)3	12	28102	28113	IGS(rpoB,trnC-GCA)
BM	p2	(AT)5	10	29158	29167	IGS(trnC-GCA,petN)
BM	p2	(AT)7	14	33170	33183	IGS(trnT-GGU,psbD)
BM	p6	(GTATAT)3	18	36622	36639	IGS(trnS-UGA,psbZ)
BM	p4	(ATTT)3	12	42809	42820	IGS(psaA,ycf3)
BM	p1	(T)10	10	43044	43053	IGS(psaA,ycf3)
BM	p1	(T)11	11	43166	43176	ycf3
BM	p2	(AT)7	14	43646	43659	ycf3(intron)
BM	p2	(TA)5	10	46961	46970	IGS(rps4,trnT-UGU)
BM	p1	(T)10	10	47050	47059	IGS(rps4,trnT-UGU)
BM	p2	(AT)5	10	49015	49024	IGS(trnF-GAA,ndhJ)
BM	p2	(AT)5	10	49657	49666	ndhJ
BM	p2	(TA)7	14	51403	51416	IGS(ndhC,trnV-UAC)
BM	p1	(T)15	15	52089	52103	IGS(ndhC,trnV-UAC)
BM	p5	(ATATT)4	20	52881	52900	IGS(trnV-UAC,trnM-CAU)
BM	p1	(T)10	10	55193	55202	atpB
BM	p1	(A)13	13	55793	55805	IGS(atpB,rbcL)
BM	p1	(T)10	10	57578	57587	IGS(rbcL,accD)
BM	p1	(A)12	12	61702	61713	IGS(ycf4,cemA)
BM	p1	(A)12	12	64316	64327	IGS(petA,psbJ)
BM	p2	(AT)5	10	64813	64822	IGS(petA,psbJ)
BM	p1	(T)12	12	66693	66704	IGS(psbE,petL)
BM	p2	(AT)5	10	69045	69054	IGS(rpl33,rps18)
BM	p1	(T)10	10	70720	70729	IGS(rpl20,rps12)
BM	p1	(A)10	10	71397	71406	clpP(intron)
BM	p1	(A)12	12	72312	72323	clpP(intron)
BM	p1	(A)11	11	72417	72427	clpP(intron)
BM	p1	(A)10	10	76261	76270	petB(intron)
BM	p1	(A)13	13	76587	76599	petB(intron)
BM	p1	(T)10	10	79329	79338	rpoA
BM	p1	(T)11	11	81775	81785	IGS(rps8,rpl14)
BM	p1	(T)11	11	83882	83892	IGS(rpl16,rps3)
BM	p2	(AT)8	16	85106	85121	IGS(rpl22,rps19)
BM	p1	(T)11	11	85438	85448	IGS(rps19,rpl2)
BM	p1	(A)10	10	97438	97447	IGS(ndhB,rps7)
BM	p1	(T)11	11	99441	99451	IGS(rps12,trnV-GAC)
BM	p3	(TAA)4	12	100554	100565	IGS(rps12,trnV-GAC)
BM	p1	(T)12	12	103437	103448	trnI-GAU(intron)
BM	p1	(G)11	11	104660	104670	trnA-UGC(intron)
BM	p4	(AGGT)3	12	106744	106755	rrn23
BM	p1	(T)11	11	108909	108919	IGS(trnR-ACG,trnN-GUU)
BM	p1	(T)10	10	110898	110907	IGS(trnN-GUU,ndhF)
BM	p1	(A)18	18	111572	111589	IGS(trnN-GUU,ndhF)
BM	p3	(ATT)4	12	113276	113287	ndhF
BM	p1	(A)10	10	115326	115335	IGS(rpl32,trnL-UAG)
BM	c	(C)13(A)15	28	115858	115885	IGS(rpl32,trnL-UAG)
BM	p1	(T)10	10	125222	125231	rps15
BM	p4	(TTTA)3	12	125256	125267	IGS(rps15,ycf1)
BM	p2	(TA)5	10	125337	125346	IGS(rps15,ycf1)
BM	p1	(T)19	19	127708	127726	ycf1
BM	p1	(T)15	15	128363	128377	ycf1
BM	p1	(G)10	10	128999	129008	ycf1
BM	p1	(T)18	18	129339	129356	ycf1
BM	p1	(A)10	10	130021	130030	ycf1
BM	p1	(A)11	11	132009	132019	IGS(trnN-GUU,trnR-ACG)
BM	p4	(CTAC)3	12	134171	134182	rrn23
BM	p1	(C)11	11	136258	136268	trnA-UGC(intron)
BM	p1	(A)12	12	137480	137491	trnI-GAU(intron)
BM	p3	(TAT)4	12	140361	140372	IGS(trnV-GAC,rps12)
BM	p1	(A)11	11	141477	141487	IGS(trnV-GAC,rps12)
BM	p1	(T)10	10	143481	143490	IGS(rps7,ndhB)
BM	p1	(A)11	11	155480	155490	IGS(rpl2,end)
