# Supplementary material for: Phylogenetic relationship and comparative analysis of the main Bupleuri Radix species in China
Source: PeerJ. 2023 Apr 14;11:e15157. doi: 10.7717/peerj.15157 (PMC10108860; doi:10.7717/peerj.15157)
Supplement: Supplemental Information 5 [file peerj-11-15157-s005.xls]

## Sheet: CandiSSR_Output_PolySSRs
Table S5. Polymorphic cpSSRs of five Bupleurum species.
SSRID	Type	BC01	BC02	BC03	BC04	BC05	BB01	BS01	BS02	BF01	BM01	Std_dev	MissingRate	Transferability (Similarity)	Upstream_100bp	Downstream_100bp
CPSSR_1	AT	5|33380-33589|+	7|33513-33526|+	7|33467-33480|+	N/A	5|33475-33484|+	7|33561-33574|+	7|33549-33562|+	7|33556-33569|+	7|33589-33602|+	N/A	0.87	0.2	1	ACATAAGAGCCTTTCTTTGATTACTTTGATTACAGACTTTGATCTTTAGCAAGGTTCATTTATATCTATATAAGATTTATAATAAGATTGATCAATTTAC	CTATCAGATCGCAGCTTCATGTACCAAACATTTACATATTACTGCATCCGATATTTTGGTTCCGCCCGCGTCGTGTATAATGGAGGCGTGAAAAAGACTT
CPSSR_2	AT	7|49513-49726|+	7|49657-49670|+	7|49599-49612|+	7|49564-49577|+	4|49574-49581|+	7|49698-49711|+	7|49685-49698|+	7|49693-49706|+	6|49841-49852|+	N/A	0.96	0.1	0.98	GACTGAAAATCCTCGTGTCACCAGTTCAAATCTGGTTCCTGGCACATGATTAATTTGTATGAGTCTTTTTTTTTCTATAAATTACTTAAGATAAATCGAC	TCATTAAAAAAAAGTTTAGATCATACTACATACTTTTCTCCATCTCGGTCTTTGGATAAATACCCCATCTATTTTATAGATGGGTAAAGTATGTAACAAA
CPSSR_3	AT	7|85210-85423|+	7|85264-85277|+	7|85220-85233|+	9|85182-85199|+	8|85206-85221|+	5|85393-85402|+	5|85360-85369|+	5|85375-85384|+	10|85495-85514|+	N/A	1.7	0.1	0.99	CATAGATATATGTTGACCTAAAGCGTATACTTCTTTTTTTATCTTCTTTATCTTCTTTAACATAAATAGAAAATTTGCCTCCTACTAATGAGTGATAAAC	CTTTTTTTACCTTCTTTTCTTAACGACGAGATTTATTATCGCTTTTTGCATGTCCTCGGAAATTCAAAGTAGGTGAAAATTCTCCCAATTTGTGGCCTAC
CPSSR_4	ATT	4|9532-9743|+	4|9670-9681|+	4|9635-9646|+	4|9633-9644|+	4|9631-9642|+	2|9714-9719|+	2|9725-9730|+	2|9720-9725|+	2|9707-9712|+	N/A	0.99	0.1	0.98	ATAACTTTTTTTTATTTAGTTATTTAAATTAGACCTCTTTTTTTTATGAATTCTTTTTTTTTGGAATCCCCTCGAAAACGTCAACCCTCCCATTTTCATA	TTATGATCCTGTCTTGATTACCCCAAATTCTCCCTCTTCGACAAAAGGCCCTTTTTTATATAATAATAGCATTGTGGCGGGTATAGTTTAGTGGTAAAAG
CPSSR_5	ATTTC	3|71171-71385|+	3|71236-71250|+	3|71190-71204|+	4|71152-71171|+	2|71163-71172|+	N/A	N/A	N/A	2|71460-71469|+	N/A	0.69	0.4	0.99	GTATTTCTGATAAGTTGTTTAATAGTTGGCATCTTGAATCATATCCTATAATGGGCTGGTTTAGATCAATCCTAACCTGATGATTATGAATTATACTTCT	TAGTAAATTCGGCAAAAAGATAAAATCTTAAATCGAGGATTTACGCGAAAAAATCCGGGCTATTTTCACTCAACCACCGCTACAAGATCAACAATTCCAT
CPSSR_6	GAT	4|32947-33158|+	4|33078-33089|+	4|33034-33045|+	4|32995-33006|+	4|33014-33025|+	4|33140-33151|+	4|33127-33138|+	4|33136-33147|+	4|33155-33166|+	2|BM01:32756-32761|+	0.6	0	0.99	AATAGGTTATCATCCTACTGAATTAGAATTTCGTAGAGTATAGTAGTTTAGTGAATAGGTAGAAAGTTGAACATTTGTTCAGTGAATTCTAATTCAGTAG	AAGCGGTTTCTGGAATCACCAAACTTTCCCTTTGTACGTTTTGCTAATCAACTGCATTGTAAAGATTAGAAATCAACAAAAAAAATAAGTGGACCTGACC
CPSSR_7	TA	5|51903-52112|+	5|52048-52057|+	8|51990-52005|+	N/A	6|51959-51970|+	N/A	N/A	N/A	5|52223-52232|+	N/A	1.17	0.5	0.99	AATTCTAATCTTTAGAATTTCTAATTCTTTTTTTATAAATTATTCTTAGTTAGATTATAAGTTGAAAGCCTTTTTTAGTATCTTTATATATCTTTATCTT	TTTTTTTCTATTCTTGTAGGAATATAGGAGGGTTTTCCCTTTTTCTTAGAGAGTTAGAATAGAACAAGTAAGATAATTTCTAAAAATTATCTTACATCTC
