# Supplementary material for: Phylogenetic relationship and comparative analysis of the main Bupleuri Radix species in China
Source: PeerJ. 2023 Apr 14;11:e15157. doi: 10.7717/peerj.15157 (PMC10108860; doi:10.7717/peerj.15157)
Supplement: Supplemental Information 6 [file peerj-11-15157-s006.xls]

## Sheet: CandiSSR_Output
Table S6. Polymorphic nSSRs of five Bupleurum species.
SSRID	Type	BC01	BC02	BC03	BC04	BC05	BS01	BS02	BB01	BF01	BM01	Std_dev	MissingRate	Upstream_100bp	Downstream_100bp
1	AAAC	3|300-511	2|117-124|-	2|134-141|+	2|400-407|+	N/A	2|119-126|-	N/A	N/A	N/A	N/A	0.4	0.5	TCGAACTTACTGCAGGCAACTTTTTCAATTGTTTGGAATCACATATCAATGTTGATACTTCAGTCTGTAAAATACAAGTGCATAATCAAGATCTATATCA	ACATAACCACAAATTTAGAATGAAAAGAAATGGAATTATAAATCATGGATATTTTTGCACTAGGGGTGATCAAACCTCATTGAGGGAGTGAACTAAAGCA
2	AAAC	3|69-280	3|449-460|+	N/A	3|944-955|+	3|97-108|-	N/A	N/A	N/A	4|137-152|+	N/A	0.4	0.5	AGTCCCGTCCAAAATTCCCGAGCAGAACTCCTAAAATGGCCAAGTCATGGAATGAACTTAGTAATCTGGTAAATTCAACGATAAGTCAACTCGGAAGAAA	AGAGAAATCTCGTTTCCACTGAAAGTTTAGAACCCATTCGTACTTCAGTTTTTGCTGGTGTTGGATCGGACTCCAGCAGATATTTGGAGCCAATCTTGTA
3	AAAG	3|76-287	2|817-824|+	3|406-417|-	N/A	N/A	2|376-383|-	N/A	N/A	2|293-300|+	N/A	0.49	0.5	AATGAAACCTATTTTTGTTATAATATGATATGAAATCCTCTAAAAATGCCATAATGCATTAATCTTGATTTAATCAACATATACAAGGCACGATGAAACT	GAACTTGATAACATATAACTAGCTAGATGAGGAAATTAAAAAATACCCATCCATTTCAGGCATTTGAATATCCATGAAGCATGCGTCAAAATTATGAGGT
4	AAAG	4|44-259	4|1035-1050|+	N/A	3|258-269|-	3|208-219|-	N/A	N/A	3|705-716|+	N/A	N/A	0.49	0.5	ATCATATGTAAGATTGACATTTGTTAGAGTGAAAGAGAGAAATGAAGCAGTGTTGATGCAATGCACTAAATAAATTTATGATTTATATTTTAACAGAGTA	AAGGTAAAAGATGCCATGAATATGCAGACATTAGAAACCTATAGCCCCCTAGTATTTAATTTAATGTTGCTAATATATCCTTTACTGGCTATCTGATGTC
5	AAAG	4|13-228	N/A	N/A	2|184-191|+	4|165-180|-	3|402-413|+	4|437-452|+	N/A	N/A	N/A	0.8	0.5	TATTTTTCATATATAAAACTTACAAAAAGAATATTTCAAGTATTTTTTGTAATAAATTTATATTCATTTGTGAAGGTATTTGGCTATTTTATTAATAATA	AAAAGCAAAGCCAATGTTTATATATTTCTTTCTTTGAGGGTAGAGATGTTTATAACAAACAGTCGGCCAGAGTAAGATAAAATGACATAAATATCCGGAT
6	AAAT	3|10-221	N/A	3|253-264|-	3|287-298|-	N/A	2|204-211|-	N/A	3|494-505|+	N/A	N/A	0.4	0.5	TTGATACTTTTGAATCAATTTCATGTAATGGCTGTGTCCAATTTTTTTGTATTAGAGTGCATGGTTTAAAAGAGCTCATGCAAACAAAAGCATTATCTAA	AATATAGATGGAAGCTCAAGTACAACTACCACAGGCAAACGTAGTGCTGTGATTCCATCAGGTGGAAAAGAAATATCATTGCCTGAAAAAGAAAATGATG
7	AAAT	3|145-356	N/A	N/A	N/A	3|106-117|-	2|265-272|-	2|130-137|-	3|339-350|-	N/A	N/A	0.49	0.5	AGTAAAATAAAACAATTTTAATACTGCCAGTTTTAAATAAGCGCTAACTAATACGAAGCATTTAGTTTACTTTTAAAATGGGTATAGCCCTTTTCATTAA	AGATAGATAAAGGGTATAGCCCAACTAAATAATGAAAATGATTCTAATAGACTGGTGAAAGTGAATAAGAAATTAGCTTTTGATAATAATAACTGTTCAA
8	AAAT	3|576-787	4|159-174|-	N/A	4|358-373|+	3|104-115|+	N/A	N/A	3|270-281|-	3|288-299|+	N/A	0.47	0.4	TTTCTATGCATTTTCTAGCTCCACAGCTTTTTTTTAATTAATACATCCCATCATCTTTTGCAAATACATGTTCATATTGGTAAACATGCTGTTTTTTGAA	AAACTTGTTTATCGTGTTACTTATATATTATTATTTTATCTGCAGGAGGTTGATAGATTTCATGACTTAGAGGAGGAGTTGAAGCTTAGGGGGTACTGCG
9	AAAT	5|299-518	N/A	5|230-249|-	4|227-242|-	4|210-225|-	N/A	4|103-118|+	N/A	N/A	N/A	0.49	0.5	AATACAGGCATTAACCTTTTCCGAACTTGATGAACGAAAATCTTCCCAGTATCTCTTGAAGTCCAGCTCCAAGTTATGTTTCTCATTGCTTATTCCAGAC	TTAGAAGACTTATATTTACAATCAACTATCAGCTATGACTAAGGAGCCAATACATACCCATCACCGTTTATTAAAACGCATGATCATGGAGCATGAATAT
10	AAG	4|94-305	N/A	4|521-532|-	N/A	3|114-122|-	N/A	4|208-219|+	4|137-148|-	N/A	N/A	0.4	0.5	GTGGTACGATTTCGATCCATTTGTAAATTGTGGAATGCTCTGTTTTCTAATCCCAGTTTCATGCAAAACCACTTTGATCATAATGGTTTTATATCTCACA	ATGATTACCTTATACTTTGCAAGTTTAGATGCGCATGTCGTACTCGTAGTCTAACTATCCTCTCCCACAATAATTTCTTCGAATCTCCCATCAACAATGC
11	AAG	4|105-316	N/A	4|347-358|-	4|428-439|-	N/A	3|298-306|+	N/A	N/A	4|376-387|+	N/A	0.4	0.5	CTTCTGTTGCTGCTGGTGTCAGAACCAGAGCAATAACCCTCTTTATCAACTCATATAGTGCTGCAGAGAGAAGAGTGAAGAAGAAACAATCCTCAAATCA	CATATTTCAATTACCTAATCTGATTGATACGCATCTGGAATATGCGCATAGATATACGCATATCAGAAACACGTATGTGATGTTGTAAGTAAGGGCCGCT
12	AAG	4|981-1192	3|182-190|+	N/A	N/A	3|158-166|-	N/A	3|329-337|-	3|339-347|-	N/A	N/A	0.4	0.5	ACAGGATTGAATGGAAGAAAGTGTACTTCTCTAATACCAGCTCGAGCCTGAAATTTGATATTTCACCTTATGTCACATCTACTAACTTCTTATAAATAAT	AATAAGGAATGGATATAAAAAGATATTGACCTCTTTAGGATCAGCAAGTGTTCCAACAATAGCAGCATCAATAGCATCTTGATTTTCGGTCCTCGAAGCT
13	AAG	5|188-402	5|380-394|-	4|99-110|-	5|102-116|+	N/A	N/A	N/A	3|183-191|-	N/A	N/A	0.8	0.5	GGAATGGAACATTGTTTTTGCCAAAAGTGACCAAACAACAAAGCTCTTGGTGGATTTTGTATAGACAATTATAGCAATGTTTGTCTACTGACTCCTCACC	AACAAGATCTAGAAGACGGACGTATGGATCTTTGTTAAATCTTATTATGACTTTTGATTATTTTTGTTATTATGATTAAAAAGCTATTATGCACTTATTA
14	AAG	6|79-296	N/A	N/A	5|453-467|+	N/A	5|175-189|-	5|204-218|-	3|259-267|-	N/A	N/A	0.98	0.5	CCATAATTTTCATTGTTGATTTGATCAAGATCATGGTCAACTATATTATACAATAACTCCATGAGTACTTGCTAGCTAGCTTATTGTAGTTTGAGTATGT	AGTAGTTGATTTTGAGAATCTGAGTGTGTGAAATGTGTGTTTATATAGAGGAATAAAATTTAGATTTTGAGTCAAAGTTTGGAGACACAAATATTTGAAT
15	AAGG	3|52-263	N/A	3|302-313|-	N/A	2|147-154|-	3|148-159|-	3|676-687|-	N/A	N/A	N/A	0.4	0.5	AGTTCTGAGATAAGCTTTAGTAGCATTTTCAGCAGACCAGCAGCCCATTTTAATTTATCTGCCTTGTGTGTGATATGGTGGTTAAAGCTTTGGGCTTGTA	CTATCTTAGTTGTAAAAGAAGAGTGTATATTGCCTTGATCTTCAGTATAGTGATTTACCGTGCGGAGGCCAATTGCCGGACCTCCATTGCAAGCTGACGA
16	AAT	4|121-332	4|510-521|+	4|103-114|-	N/A	4|114-125|+	N/A	3|126-134|-	3|538-546|-	N/A	N/A	0.47	0.4	TTCTAGATCTTTTTGTGTAGTTTTCATCAATGTTATGCAATTTAAGCATTTGGGTATTTGTAATCTTCTTCAATTAATTTGATCTAGACCAATCAAGAAA	ATCAAATTAGACCAAGAATATTTGCTTGAAGTTGAGTACCTGCTATGATAAGATAAAAGGTTGTAACAGCATGATTTGGTTTATAGGATTTGAGTGGTTT
17	AAT	4|183-394	3|282-290|+	4|212-223|+	N/A	N/A	N/A	3|666-674|+	4|426-437|-	N/A	N/A	0.49	0.5	TTAATATTTTCTGGCTAATAGCCCTAAGGTATGAGGCTATCTCCCGCTCTGAAAAAGATTAAGCAATAAGAGCATTAATATATTACATATTTACCAAAAC	GAAGCAACTATTAATGAGAATATTTATGAAACAGTGTAGATAAGAACAAATGTATAACATTACAGCAAACATAAACGAATTAGAGGAGCCAGGCTTCAGA
18	AAT	4|16-227	3|303-311|-	4|98-109|-	N/A	N/A	N/A	4|223-234|-	N/A	4|367-378|-	N/A	0.4	0.5	CAATGGGATCAACAGGTACATTATATTTTCAGTATAATGGTGCTGCATCTTGTTCATAAAGTTTTATTAGCCTACAAGTGACGTCTTTTAGGAATTGTCC	CACTGTATTGTCTGCATTTTTAAAATGGGATTGATGTTATATATTTTTCAATCTATATTCTCAGTTTGTGTTTATCATTACTTGTCATATGTTGCCTCTG
19	AAT	4|604-815	3|228-236|+	3|105-113|+	N/A	N/A	N/A	N/A	3|232-240|+	3|107-115|+	N/A	0.4	0.5	TCCTGTGAAACCAACCCCATACGAGTTCAAAATCCTCTCTGACATAGATGATCAGGAGGGTCTCCGTTTCCAAATTCCAGTCATCCAATTTTACAAGAAA	TTTCTTGGTGTGCAAGAATTGGACCCTGTGAAAGTCTTCCGGAATGCACTTTCCAAGGCCCTCGTATTTTACTATCCGTTTGCTGGTAGGCTGAGGGAAG
20	AAT	5|505-719	3|315-323|-	N/A	3|123-131|+	N/A	N/A	2|407-412|+	4|282-293|+	4|350-361|-	N/A	0.96	0.4	AACTCCTGCAAAACCAACTCCATACGAATACAAACTCTTATCTGACATCGATGATCAGGAGGAACTCCGTTTCCAAAATCCAGTCATCCAATTTTACCAA	TTTCTTGGTGCACAAAAATTGGACCCTGTGAAAGTCATCAGGAATGCACTTTCAAGTACCCTGGTATTTTACTACCCGTTTGCTGGTAGGCTGAGGGAAG
21	AATA	3|336-547	N/A	N/A	2|279-286|-	3|259-270|-	2|286-293|+	2|104-111|-	2|108-115|+	N/A	N/A	0.47	0.4	TTAATTTGTCTTTTTAAAAATGTGTTAATTATAAAATATGTATGAATGAATCTGATAAATATTCATGCAATAATATTTTGATTTTCAAATAATCAGACGC	CTAGCCTTATACAGCATGTGTGGCTGTTGGTTTATAATGTGTTACTTGGACTCTTTCTTTTGCACTTGTCAATGTATAATAGTGCCAACAGACTGCCTGG
22	AATA	4|373-588	2|320-327|+	3|241-252|+	2|437-444|-	N/A	N/A	N/A	3|185-196|+	3|378-389|-	N/A	0.69	0.4	AGAATGTTCCGTCAAGTGCATACTCAGGAGACATGTAACCACTGTAAGAGAGATAATTAAGCATTCCTAAGAAATTGAGTTCAAGTGAACTAATAGCATG	GAGGACTTGATATAAAATTCTTACAATGTCCCGACTACTTTAGTAGTCTTTGCTTCAGTTTCACTTCCCGTGAAACTTTTGGCCAACCCAAAGTCTGAAA
23	AATT	3|15-226	N/A	3|254-265|-	N/A	3|439-450|-	2|103-110|-	2|16-23|+	N/A	N/A	N/A	0.49	0.5	TACTAAATGCTTCTTTTCTTTTTTGTAGGTATGTGCTTCCTGATACACACCCATTGCTGGAAGGGGTTAGTATAAACTTAGTTTGATCATGAATAACTGC	GCTTCTTTTATATCAAAGCCTTTTTTGAGTATAATATAATATTACAGCTTGACCGGAGAGACTCTGATGACCCGTTCCATTACCTGCTCGCTATATGGAC
24	AATT	3|169-380	2|125-132|-	N/A	N/A	N/A	3|116-127|+	3|140-151|-	2|126-133|+	N/A	N/A	0.49	0.5	GATCAGTATCATTTTTCCCAGGAAACAGTGGCTTTCTTAACATTAATTCCGCAAAGATGCAGCCAATACACCAGATATCAATAGCATATGTATACTACAA	GGTATCACAAATAAGACAACATTACAGGAACATTATAGCAATTGTGAGTAACTAAACATGCCAAAGCTATAAATATGGCATGATCTCTATAATTTATTTA
25	AC	10|228-447	N/A	9|231-248|-	9|210-227|+	4|195-202|-	N/A	N/A	N/A	8|328-343|+	N/A	2.1	0.5	TGGCATAGAGTATTAAGAGGAGAGAACCTCTTATTAAGAGGGAAAAACACCTACTTAGCTACTTCTATCCTCTTAATAAGAGGTCTATACTCCAAACAAA	TATATACACCAATATATAATGGATGCAACAGATTTTCCAAGGAAATAGCTAAATGAGCAGGTGCAAAATCATGTAAAACAAGCTTAGGCAACATATTATG
26	AC	12|88-311	N/A	N/A	9|215-232|+	11|105-126|-	12|119-142|-	N/A	10|207-226|+	N/A	N/A	1.17	0.5	GTTGCTGGCCTTCAAATCTCCATTGGTGATCATGTGTGGGTCCCTGTCTCCCCTGACCCCACTGCCTTCTTTGTCAATGTGGGTGATGTCCTGCAGGTAA	AAGATGAATGCTCTTAGCAATAATCTTTGATGGCTTTTTGATTTTGGTTTTGCAGGCTATGACAAATGGAAGGTTTACAAGTGTGATACACAGAGCAATG
27	AC	5|31-240	6|244-255|+	N/A	4|184-191|+	7|280-293|-	N/A	N/A	N/A	4|248-255|+	N/A	1.17	0.5	TCAAAATTACAAAAGTAACAAAACCCAATTATTAGGGTTTATGTCTTCAATTTAAACCCTTCTTGCTGCTGCATCTTCTACAACCATCACCGTTATAATT	ATATATATTTGTCTGCATCAGAGTAATGGAGCAAAGATTGGCTAATCCATGGCGGATGACAATAAACGAGAAGAAATTCATTGAGACTTCTTTGCTCTCT
28	AC	5|32-241	5|825-834|-	N/A	5|116-125|-	5|127-136|-	N/A	5|301-310|-	4|317-324|+	N/A	N/A	0.37	0.4	AAGTAGTTAAAGTTTCATGTCAATAGTCTCATCTTACAGATGATAAGAACTTGAGACAGTTACAGTACCCACAAAGCAGAAAGCAACATAGTTAATAAAA	AACAGATGAAGCTGCATGGGCTGCAGCATTATTATCATAGTACAATATATGGAGAAAGACTAGCTGCTCTGTTAGGCACTCGTTTCCATTTCATCGTTAA
29	AC	5|39-248	5|535-544|+	7|398-411|-	7|107-120|+	N/A	N/A	N/A	5|147-156|+	N/A	N/A	0.98	0.5	ATGACCGCCTTATGGGATGTTCTAGGGTGTCACCACAACAAAAGACGATGTGACAAGACATCAGCCAGTAGGTTCAAGTAGAGATCTAGGTTTAATAAAT	ATATAAGGAAGGTTGAAACAATTTTTTAGACAAATAGGGAAATGGAAAAGAAGATAAAGTCATACCGAATTAGAACCCTGGTTACAGTGGGCCTCGCTCT
30	AC	5|5-214	4|104-111|+	N/A	3|769-774|-	N/A	N/A	5|105-114|+	N/A	5|133-142|-	N/A	0.8	0.5	CACCTTTTTGCCCATGTCTGCTACTAAATTTGTCACCAACCTGCAGATATATTATGCATACATAGGAACATCACATTATTTTGAGATTGATCTTACTAAT	GCACGTGCACATATATGCAAGAGATAAATTATTTACCTCAGGCCTACGAGTATGACGTATCATAAATGTGATACTTAAGTTGTCATTCCTATCTGTTGAA
31	AC	5|190-399	4|500-507|+	5|99-108|-	6|258-269|-	8|13-28|-	N/A	N/A	N/A	N/A	N/A	1.36	0.5	TAAATCAAAACGTATCCGAATCAAATCATCTTGGGTCCCCATTTTTGTATTATATCTCCTTGTAATAATCCAACCTATCTCCAGCACCATACACACACAA	ATCACTATATCAGCATGTGAATTTCCAAATTTACCCTCACATTGTTAGCTTGTTAATTGTTAGTGTTAATATTCACCTCTGTTTCTTCATACATTCATAC
32	AC	5|105-314	3|353-358|-	5|117-126|+	3|559-564|-	N/A	5|142-151|-	N/A	5|384-393|+	5|219-228|+	N/A	0.9	0.3	ACAAACCCTAACAATATGTTGGCTTTTTCTCCACCTTCATTTCCAACATTTGGATGGCCCATTGAGGACCCCATGATCAACCAAGAGTATAACAGTTTGT	AACACACATTCCAAATCAATTTCTTCACTTTCCTGATGAACCAGTGCCACAAGTTGGCAATAGAGATTCTTATGAGCCAACTGTTGGCGGTAATACGATG
33	AC	5|133-342	6|205-216|-	N/A	N/A	N/A	5|151-160|+	4|207-214|-	4|428-435|+	N/A	N/A	0.75	0.5	AGAGATGTTGCCTAAACATGCTAGGCTTAAAAATATGTCATATGCATCTAAGATGAAACTTCAGGTGTACCTTAAGGTACTGACTGTTGACAGTAATAAT	ATACATCTCTATATACTTAGGTATGTGATTTTTCCCCAGTGGCTGTGTAAGAATATAAGACCCTAATTTGTATAATTAGTAACATTTGAATGTTGTATTT
34	AC	5|6-215	5|1387-1396|+	N/A	5|1085-1094|+	3|214-219|-	N/A	5|197-206|-	N/A	N/A	N/A	0.8	0.5	ACTGATTAACACATACACTCATGTAATCAAATGACATGATGTTTGATCTAATGGAACTTTTTCGGAACAAAAGACCCTTTTTTTGAACATTGACAGAGAA	AAACACATATAACTTACCAGTATCTCGGAGATGACACGTGGTTGGCGGAAGGGTTTCAAAATGAAGACAAGAAGACGAGTTATAGTGACAACCATGGTGA
35	AC	5|339-548	5|422-431|+	N/A	5|363-372|-	4|162-169|-	N/A	7|254-267|+	N/A	5|173-182|-	N/A	0.9	0.4	AACACTGTCAGAAGGATTTAGCATATTAAAAGCTATACATAAAAACAACTATATAGATTATGTGTCAAGGTAAATATATTTTTTTCGTGTCAATATATAT	ATGTAATTTGGACCTTGACAAAAGAATCGGATGTAACAGGAGCTAAACCAGAATCAACAATTGACGTCTTGACGGAAACGGAGACCGGCAACATGTGCCG
36	AC	5|291-500	5|157-166|+	N/A	5|211-220|-	5|260-269|+	N/A	N/A	6|392-403|+	7|302-315|+	N/A	0.76	0.4	AATGGAAAAGGCTAAGGCAGATTTAGTACATGCTGAAAGTTTAATAGTCCCACATCATGTGCTACCTCCCGACATGGATTCCGTGTTCTATTATAATGTT	ATACATATTCAGGCACACTTGAAGCAGGAATTCCTTGTGGTCCATTATGCATAAGTGATCGTGATTAGAGAAATGATGGGGATTTTTATGATAAAATGTC
37	AC	5|179-388	4|131-138|+	N/A	6|116-127|-	4|413-420|-	N/A	N/A	N/A	5|545-554|+	N/A	0.75	0.5	TTGCTGCATCAGAAACAAAAATACACGTAAGATTTTCGACACCTTATGCAAGAGACTCGCCATTACATTCTGAGTGATCAACTAAATTTTACAACATTAT	CTGGCTGTTGAGGGGCAACATCGTACGAAGACGAGGCCATAGTTACACCAGAAGTCCCGTCTTTAACGAAAAGATTGTCAATATGAGAATATACCCCGCA
38	AC	5|411-620	6|121-132|+	5|117-126|-	N/A	N/A	5|179-188|-	N/A	N/A	5|117-126|-	N/A	0.4	0.5	ACTTGATGTTCCTCTAATATCTATGAAATTCACATCACTCACTTGTACATGAGAGCTTTTCTGCAAATCATCAAACAAACACATTATTACGACAAACAAA	GATTGAAGAGAAATTAATTATACATACACTGCATTGTCCGAAGCAATATTTCTGATCAATGACTATCGGATTTTGCGTGTTATCCATTTGAATATCTTCA
39	AC	5|24-233	5|378-387|+	N/A	5|716-725|+	N/A	8|223-238|+	7|281-294|-	5|166-175|-	N/A	N/A	1.21	0.4	AGATAAGAAGATAAAATATCTCCCACTTGTTTTTGTTGCATCTAACTGTTGCTTAACTGCTGCAAGTAATTCTTTCCGTTTACATATGATTCCTAAAGCT	CCACACAGTAAACATTCTTCGCAAGTATTGGCTAAATGGAAGACTAATGATGGCTAAAATATACAACACAAAAGGCATAATACATTTTTTGAGCATATTG
40	AC	5|547-756	N/A	5|176-185|+	4|303-310|+	3|129-134|+	N/A	N/A	4|105-112|+	N/A	N/A	0.75	0.5	ATCAAAAACTTTGAAAAAAACAAATTAGAAACATTATTAGAGTAATCCATCAAAATTCAGAAACTTAGAAGTCAAAATCCAAATTTACAGAATTACTGCA	TTGAAGGAGCAATTCTGAACTAGACAATACATCAAAAATGATACAGTATACTGATCTAAGAGACTAAATGAAAGAGTACTGTAACACTAATAAACAGATT
41	AC	5|749-958	N/A	5|504-513|-	6|335-346|-	5|333-342|-	N/A	N/A	5|211-220|+	N/A	N/A	0.4	0.5	TTCTCAACCCATGGGTATGATTCATAAGCCAGTTTTCGGTCTAATCCTAGTTCCTCAAGACTCCTGCAAGATCATAAACATTCATATATTATACACACAG	ATATCGAATATCACATTCAAATGAACAAATTAAACACCATACCTTAAACTTGGTCTAGTGTAAAATCCAGCATTGATGCTAGTGCCACCACCCAAAATCC
42	AC	6|148-359	N/A	N/A	5|238-247|+	7|95-108|+	N/A	6|491-502|-	6|225-236|+	6|203-214|-	N/A	0.58	0.4	AAACATTAACAGTAATAAGTTGCAAAAATGTGAGCATCTTATTCATCAATCTAGAGCCAGTTGGCAGCATGTTAATACTTCAAATGTGTGGTCACACCCA	AAAAAAATGTCATAGAAGATGGAAAAGTAAATATTGCACCTTGGAAAAACAGCTCCTAATATATCTTTCTGTCCATACTTTCTCCAACTATAACCATCAT
43	AC	6|273-484	6|655-666|+	N/A	7|104-117|-	6|292-303|+	N/A	N/A	5|704-713|+	N/A	N/A	0.63	0.5	TCTACAGCACAGTTCATCAAAACTTTCTCTCCCAACCTCCAAGATCGGGACAAAACATTCTAAAACAAATGAAAGTTCTATAAAAATATGATATACATTT	AGACAGAGTAAAACAAATGAAATCACAAAAGAATACAAGTACCTGATCATCTTTTTCTTTACTGACACTATTAAGGAGGATAATCAGAACCTCTTCAGGA
44	AC	7|36-249	N/A	8|365-380|+	5|315-324|+	6|211-222|+	N/A	6|478-489|+	N/A	N/A	N/A	1.02	0.5	CAGAACTCTGTATAAACATATATAACCAGGATAGCTGATTGTTACATCACATCAACAATAAAGGAATCAACTTACCCATAATTTATAGGTATCTGTTACT	ATGTCATTCCAAATCAGCAAACACATAATTAGGATTAACCTCTAAAACTTGCATTGGATCTAAAGAACCTCCATGATTGTGAAGCAGGCGAACAGCAGCT
45	AC	7|33-246	N/A	7|381-394|-	7|433-446|+	4|482-489|-	4|99-106|+	N/A	N/A	N/A	N/A	1.47	0.5	TTCTACACCTGTATGCATACACATGAAGTATATAACATCAAACCATAGACTAAATTCATTAAGCAGACCTTAACTGTGCCCCTGTAGGCCATGAGGTCCA	AGACACATAAAGTTGCATACCAGCAAAAGTGGCTGCAATTTTCATGGCCTTGGCCCGAGATTTCTTGGGGTCAGACATGTCAACTTTGATCACCACTTTT
46	AC	7|22-235	N/A	6|117-128|-	N/A	6|292-303|-	6|356-367|-	N/A	5|183-192|+	N/A	N/A	0.63	0.5	ATTCATCGTCTTCGTCGGCCGTACTGTCGCTACTCGCACTTCTCCATCTCAACGCCAATCCGTACAGCACGAAGGTCCTTCATTGTTTCTTCTTTCCATT	TCACATTATTATTCTTTTAAGACTTATGTGAAATATTGATTGGATTGTATACCTGAGTTTTTTTTGGTACCTGAATGATGTAATTTGAATATTTTGAGAA
47	AC	8|27-242	11|249-270|-	8|219-234|+	7|420-433|+	N/A	8|306-321|-	N/A	N/A	8|138-153|+	N/A	1.25	0.4	ATGTGCTTACACGCCAAGCAAAAATGGCCAGACCTCTGCTCTGATACTCGGATCAACACCCTACAACAGAATCCATTTTAAATGTTTAGCAGTAAAATAG	AAAGAATAAGAAGAATATAAAACATGTGTAACCGACTTACCCCGCTGCGCACTTGTTTCAAAAACTTAACTCCACCATCTTGGAATTTCCCCTCAGGTGT
48	AC	8|19-234	N/A	6|163-174|+	6|625-636|+	N/A	7|157-170|-	N/A	8|163-178|+	N/A	N/A	0.89	0.5	AGTTTTAATCATCCAGACCACAATCATAATCTTATTGGACATGTAAGTCATATATTTATATATACCATGCACTAGTTCCTAATCTCTTGGGTTGGTGTAT	ATTAATATCAGCTAATTTCTTAGGTATGGAAAAGCTATAATGAAGACAGTCTTTTGGCTGTAGTCGATGGTGTGATCTTGGAGTCATGTAATCAACTTGA
49	AC	8|25-240	N/A	9|108-125|+	N/A	7|333-346|-	8|332-347|-	N/A	N/A	8|185-200|+	N/A	0.63	0.5	AGCCCATACAATCTCATAGCTGATATGCAGATTGTTAACTTCATATTCAACAAGAAGCAATAGCATGTTAGTGTAGTTGTGATTTATGCCCCCCCACAAA	AATTCAAAAACTGATCAAACATTTTGCCAATCATTCATGGCTTTGAGCCAAAGTAGCAACAGAGACATTGCATGTTTCAAGATATTATTGGCTCTTTATT
50	AC	8|306-521	8|231-246|+	6|937-948|-	6|165-176|+	7|105-118|-	N/A	N/A	N/A	N/A	N/A	0.89	0.5	GGTTTCATTGTTGTTCGTTCATTAGTTAAGTTGAGGCACATTATTGTTCACCGTTGAATTTATTATCTTGTTCATTGTTGTTTGCTCCTATATATTCAGA	AGAGAATATTTAGTACAGTTGATCTTCCATTACTAATAGAGTTGGTTTGGCTTTTATACACAGATTGAAAGACTTGAAATTGCAAGTTCTAAAATATGCT
51	AC	9|85-302	6|165-176|+	N/A	N/A	6|322-333|+	N/A	N/A	9|238-255|+	6|390-401|+	N/A	1.47	0.5	CTGATAACTTGTCTCCATCAGATAATTTCTGTTTTTTGTGAGGAAAAGGATTTGAATCATCCTCATCATCATCTGCAAATTCAAAGCCAAACATTACAAA	AACTGAAAAACATATGTAATCATACAGAGAGAAGAAACGAACCGTCTAAATTAATAGGATCGAGAGGCTGAACGCGGCTGTAATCAAACAAAGGTTCCAG
52	AC	9|69-286	N/A	9|317-334|-	9|92-109|+	N/A	9|138-155|+	8|105-120|-	N/A	N/A	N/A	0.4	0.5	TTTATAGGCTAAAATGGATTGGAACTGTAAGGGATCATGAACAACATAGTAGAAGTAATTTCTGTTACAATCTACCAAACAATATATACACATCTACAGA	ATATCATATACAGTACAAAAAATCAAACCACATCTTTGCCTCTAGCTAGTATTTTTATATCCAAAGCACCACATTTTGTTTACATTCAAGAATATTGTAT
53	ACA	6|44-261	4|108-119|-	N/A	3|245-253|+	N/A	2|297-302|-	2|159-164|-	N/A	N/A	N/A	1.5	0.5	AGAGCAGGACTAATGCTCCAATTAAAAAGTACAAAGCTGTTGTGTTCTTCGCGCATGAGGACTTTACATTTTCTGAAGTTGACATAGATATTGCTGCATT	AATTGAATCATAATCTCAAATAATTTAATTCATTTCGTCAAAGTAGCTATTATATATCCAGTCCTCTGTCATGTAGATAGTAGTAGAATTCTTTCAATTT
54	ACAT	3|159-370	4|123-138|-	3|145-156|+	3|212-223|+	3|176-187|+	N/A	N/A	3|296-307|+	N/A	N/A	0.37	0.4	TTAACACATCCTAAAACTGAAAGATTTGTAAATGTGTTATTATTGATACCTCGTGAGGTATCAGTTAAGAAACTAGAAGACAGAAGCTGCAAAAGAGGTC	ACAAGTGATCCAATTATATTTAAACAAGTACCAGAAACAAACAGGTTGGTTCAGCTTATGCAAGCCGTCAGAATACACAAGGAACAAAACAAACATAATT
55	ACATAT	3|162-379	N/A	N/A	2|295-306|+	2|172-183|+	N/A	N/A	3|497-514|-	3|349-366|+	N/A	0.49	0.5	CAGATAGAGTAAGTGCAAAACTTACCAAAGGCATAATTATTTATCAAATAAACAAGTTATAAGCAGTAATGCACCAATTCAATTTGCAGAAATGTATCAA	CATATATAACCTTCTTTCCAGAAATCTCTAGGGTTCAGCCTAAGCAACCGCGACAATTCTCGATTAAGTAAATCCACAACAAGCTGCGACTCAACAGGAT
56	ACCA	3|81-292	N/A	N/A	N/A	N/A	3|155-166|-	3|155-166|+	3|107-118|-	2|257-264|+	N/A	0.4	0.5	TAATTAAGTAAAAACTAATTAAGGGCAATTAAGTAAAATCACAACGTACCATACCAACCAATCAAATTAAGGGCAATTAAGTAAAATCACAACGTATCAT	AACTTTTAATGTTTCGTCTATTATATAATAGTATTGATTAAAAAACCGTATTTTAAAATTTTAGACTCAGCTACGGAAGAGACCTAACTTTTTTAACCTA
57	ACT	4|30-241	2|101-106|-	N/A	2|131-136|+	N/A	2|132-137|-	2|119-124|+	N/A	N/A	N/A	0.8	0.5	ATGTGGGTCTCTACGAACTTTATGTTATGTTGATTGCAGTAGTTGAACCAGACTGAGTTTTTTATCTTGATTGATTGCAGTTGAATGTAGATATCATATG	CATGGATTCCAGATGGTAATATTTTGGTTTGATTAAGGCATTATTATACAAGAAAAAATTGTCACTGAGATTATGGTTCTTTGTTTGGCAGGATGTGTCA
58	ACT	4|124-335	3|93-101|-	N/A	N/A	3|179-187|+	N/A	4|125-136|+	3|319-327|-	3|628-636|-	N/A	0.47	0.4	AAAAGGGTTGACGGATGATGGTTTTCTGGGTGATGGTTTTCGAGACACAGAGTTGTGAGAAGAGAATCTCCCATCTCAGAAGATCTCCCTTCCTCTAAGG	AGTGATTTTAAAATTTTCATATCATGAAATTAACAGTGATTAATAGTATGGAATTGAACATATTATTAATCCCCTCAATTTCGGAAAACAGCAGAATGGT
59	AG	5|126-335	5|214-223|+	N/A	5|273-282|-	4|232-239|-	N/A	N/A	N/A	4|139-146|+	N/A	0.49	0.5	GGATGGCCCAGCACCAAAAGCTTCACTAACTTCTTTGTAAACAGATGGAAGGAGGTTCTCATCAGCACGTTCCATTACAGCCACCAGGTTGATGATAATT	AAACCCCAAAATATGTTCTTGCTCTAATTTAAGAAAACATATCACCACAAGTAAGCAACAAGGTACAATAGACCATTAGAAGTCCACCCATCCTTACTGT
60	AG	5|134-343	5|142-151|-	5|233-242|+	4|108-115|+	5|355-364|+	N/A	N/A	N/A	N/A	N/A	0.4	0.5	TGAATCGAGAAGACGAGTCAACGCCGATGAAGCTTCTAATTCTTCTCCATCAAAACAATACTGTAAGTACTCTTCTATAAAAACGATGAGATTGAGTTTT	TGAAGTCTTTACGGCTAAGAGAAGAGAGACAAAGGTCAAGGAGAGAAATCCCGGTGTACTTCAAGTTGGCCCATTTTTCGAGGCGTTGAGTAGCTCCGGT
61	AG	5|496-705	5|824-833|+	5|475-484|+	N/A	2|3-6|-	2|130-133|+	2|346-349|+	N/A	N/A	N/A	1.5	0.4	ATGGAATACCGTTCTCAAATGCATACCTCCTCCGCCAATCAACTCAGCCAATGTGATAAAATTCGGTCTATATTCCTGTCCATCAATCATCTGTGAGTAA	CTTCAAGAACAAACTCATTTCGCAAACAAGCCAAAATCATGGTATTATACGAAACAACATTTCTCTCAGGCATTATATCAAACAAGTTCCTGGCAACAAA
62	AG	6|12-223	N/A	7|767-780|+	6|229-240|-	5|356-365|-	N/A	N/A	N/A	4|95-102|-	N/A	1.02	0.5	TACTGCAACACCCCCACGTTTTTTCTCTGAATTGAATGGAAAAGCATGAATTATAGAAGAGCCTGATCTGACATCATCAAAAGCCATTCCTAGCTGCAAA	ATGATAACGACCCTGTCCGTGATGAATATTGGGGATTGGAAGAAGTTAAGAAAAGTACATTGACTCCCCACTGAAGTATAGCCTTCTCCGTTGGTGATCC
63	AG	8|218-433	5|298-307|+	N/A	N/A	5|185-194|+	N/A	5|208-217|+	N/A	5|226-235|-	N/A	1.2	0.5	CAAAATTAGAAAAGAATGGCTTCTGCAAATTGTGAGAACAAAGCAGACCTTAGTATCAAAGGAATGCAGTAATATGCACTGGAAAATAGGGGTAGAGATT	ATCTTACAGGTGCTAAACTGAAACCAGACTGAGTAAGCAAGGATCAAAGGTCAAGAGAAACAACATCTTATCGCAACAAAACCTGTATATTTATTCGATT
64	AGA	4|97-308	4|124-135|-	3|202-210|+	4|179-190|+	N/A	4|545-556|-	N/A	N/A	4|150-161|+	N/A	0.37	0.4	ATAATATATATTAGCCTAAATCAGTATATCTTCTTCTTTTTCAACCTTTCAACCAATCAGTCATGCTCTTTACTTCAAAATCAACTTGATTGATGGATGG	GCATGAGTTTGAGGATGAGAATCGTAGTATAAACATTAATGAGTTTGATAAACAGCTAGAAAAAAGAAAGATGAATAAAACAATAGCTTATACTTTTAAA
65	AGA	4|246-457	4|594-605|-	3|203-211|-	4|465-476|+	4|235-246|-	4|342-353|-	N/A	N/A	N/A	N/A	0.37	0.4	AAAACATGATTATGGATGGATTTTATTATCTCTTACATGTTTTTCTGTTGTCTGTATTCTTATGCAGAAAGCTGAACTTGCTTTCATTTGGAGAAGAAGC	GAAAGAATTGGCAGCTGTGAATACGAAAATTAGAAGTAGTCATGATGTATTAAATGATCCTCGTTTGCTGAAGGAAGACGGTTCATTTAGCAAATTGGTA
66	AGA	4|228-439	2|143-148|+	N/A	2|284-289|+	N/A	N/A	N/A	4|331-342|-	4|110-121|+	N/A	0.98	0.5	CCTTAACGACACTTAATAGCACAATACCAGTGATTCTAGATGATATGAAATAATCCTAATCAAGTAGTCTAATACTTAGTATGAGAAAGTGCTGTAGTAC	TAACTGACCTTACACCAGTTTAAACAATTAATAGCAGCCACATCATAAAGTTGGGAATGGTTCGAGTTATTTATCTGACGGAATGCACGCCACATTACCA
67	AGA	5|44-258	5|369-383|-	N/A	7|129-149|+	5|92-106|-	5|300-314|-	N/A	3|383-391|-	N/A	N/A	1.15	0.4	AAGAAGAAAATATGGCAACTTGTGATGAAAATTTTAGTGACTCTAGATCTTTTTTCTTGGAATCCTTGTATTGTGAAGAGGAAGTTGAGGTTGAAAGCTT	TCTCATGCAAAATGTTGTTAAAGATCAAAACTTTACTCTTTGTTTGGTTGATCAAGATTTGTTTTGGGAAGATGAAGAGCTTGTCTCTTTGTTTTCTAAA
68	AGAA	3|116-327	2|102-109|-	N/A	2|136-143|-	2|378-385|+	N/A	2|107-114|-	2|93-100|-	N/A	N/A	0.37	0.4	TAATCCAATCAACCCAAAGCGAAGCCCCGTAAATTCCAGCATCCATATACTGAAATTTCAAAAGAGAACTTGCATTAGTTGAACCTTAAAAGGTATACTC	AAGTGAGTCATACATGGACTTCCAAGGTTCCAGACTATAATAAAAAGAATCACTATAAGCTCAGACGTCATTTGTAAATGTGAAGGTAAGGGTTACAGTT
69	AGAC	3|159-370	3|939-950|+	N/A	N/A	3|593-604|+	3|102-113|+	N/A	2|293-300|-	N/A	N/A	0.4	0.5	AGTTGATATTGATAGTTTATATAAGATAAGTCCCAATGAACCAATGTAAAAATGATGGTACATAGAAATGTACTACAAGTTTTTGAACAATGAACTGTCA	ACACACAACCACTGTAGGAGAAATAGCTTCATTTAATGAACTCCGAAGTATTAATATATTATGAGTCCTAAGCACCAGTTACCAATCAAAAAATTATCTC
70	AGC	4|213-424	N/A	4|349-360|-	3|850-858|+	3|122-130|-	N/A	N/A	4|555-566|-	N/A	4|251-262|+	0.47	0.4	TAAAAAATGATTCTAGGTCATTATCATTCTTTTGTTGGCTTGTTCTTGCTGCAGCAGTAGCAGCTGCCCTATCTCTTGCTTCTGCTGCTGCTCTTTCTCT	AACCCGATCCACTGCAGCTCGTTCAGCTCTACGCCGTGCTTCTGATTCAGCCCTAGCAACAGCAGCTTTTTCCTTAGCTTCTTTCTCCCTTGCTTCTGCA
71	AGC	4|258-469	N/A	4|325-336|-	N/A	N/A	4|140-151|-	4|178-189|-	N/A	3|567-575|-	N/A	0.4	0.5	TACAAAGCGATGCAGCATCTGCCTTGCATATGAAAGCAGCAGGAGCACGCTCACATGCTTCACAAATCCAAACACGCTCATGCTGCGAAGCTATGCCATT	ATGGATACGCGCATCGCAGGTAGTACAGAGATACGCCAGGTCAGCACGGCAGTAAACCGTGCATGGCGCTGAGCGACATGTATCGCAAATACGTGCCCAA
72	AGGA	3|12-223	N/A	2|116-123|+	N/A	2|171-178|+	2|167-174|+	2|298-305|-	N/A	2|298-305|+	N/A	0.37	0.4	AACTGGTTGTAATGGAAATAAGATGAAAATGGGGAAGAAAAAAAATTGTGAACATACGTAAGGGGTGGAAGAGAAAGACACAAGGTATTTGAAAGATATG	ATGTGTATTCACTGACAAATTTTAAGGAAGAACTTCGTTTTGAAGGGGTTGAATGTATGCAAGAAGTAATTGTATCTTACACACAAAAGTTTATTATATA
73	AT	10|48-267	11|223-244|-	N/A	11|214-235|+	7|228-241|+	N/A	11|449-470|+	N/A	11|147-168|-	N/A	1.46	0.4	ATAGGATGGTGAACCATAGGCTGACCAACAAGAGGGAAAAGGGGTTTAGGTGTGTTGAATGAGAGAGGTCGAAATCGAGTACCTGCAGCCAACATACATA	GACTATAGGAGCGTGTGTATATAACAGAAAAGAAGAATAATTTTAAAAATTGGGATCGAAGACAACCAAAATTGAAGAAGAGAATCGCAGAGAGATGAAT
74	AT	10|362-581	9|456-473|-	N/A	11|394-415|-	N/A	11|240-261|+	5|406-415|-	N/A	N/A	N/A	2.23	0.5	TTGGGCAATTAGCGAACCAGAGATTTTTCATTCCGGCTTATAGGCCAGTAAATATGTTGGAAAATATCTCCCGGTAAATACAATTGATAGAGTATTGTCG	GTCATCCTTATTTACTGACTTAATATCAAACTATTGTCATGAAGAGTTATTGGCACACCAGATGAACAAATATGGCCTGGAGTGACCAAATTGTTTCCTA
75	AT	10|613-832	9|301-318|+	N/A	N/A	9|205-222|-	11|391-412|-	9|309-326|-	8|332-347|+	N/A	N/A	0.94	0.4	TTTAGTCCATATTATCACACTAAACTTCATGACTATGGTCACATCTGTGGCCCTGTTTTGGATAATGTTAGAGTTGTGTCTATAAGGTATCCAAAATAGA	GGACTTGTTATGCATATATGACCAGAAGGAATTTAGCAGCTGGTACTGTGTATGTGAAACTGCAGTCATAATTTGACCATCCTATATTGTTCTAGCATCT
76	AT	5|64-273	5|323-332|-	N/A	5|116-125|-	5|124-133|+	5|97-106|-	N/A	5|124-133|+	4|308-315|+	N/A	0.35	0.3	TAATTGACACCTCCCGTCATATTTAATAAAAATAATTTATATATGACGGATTATCGTCAAAAATATAATTTTCACAATGGCGGCAATTCTCCCGCCTTTA	GACGGATGAAGTTGGTGTTATAAATAATTTTTATTTATGACGAAAACTCATTGGAAAAAATTATGGTCAAAGTCAATTTTTTAAATTGATAAAATTGACG
77	AT	5|24-233	4|199-206|-	N/A	N/A	4|228-235|-	N/A	4|185-192|-	4|189-196|-	4|195-202|-	N/A	0.37	0.4	ATATCATTGTGTATTTGTATCCAAGTGTTGACTTTTGTCTGTCTAGCATTATTCATTGTAAAAGTGGTCGAATCTATCTTCTGTTTAGCCCTCACCAGAA	CTTATGATTAAGGCTTGGTGCTTCAAATTGTTTTTGGTCCCTTCCTGCTTTATAGTATGTTTATGAATGCAACTTAAGATAATTTAGTACTTTTGATCAT
78	AT	5|32-241	N/A	4|109-116|+	N/A	5|539-548|+	5|214-223|-	N/A	4|138-145|-	N/A	N/A	0.49	0.5	TCCCATATCCAAACTTTTCCATCTACACAGCCACTCACAAATCACAATTATGTATGAACCTAACCATGCCAAGCATGTTACGCCATCTGCCAACAAAACG	TGCAGGTTAACTAGCAATGCATATATAAGAATGTCAATCATAATTGACTCTTCTTGCTCTATTTGGAATTATATATTTTAAGATTTTTGTAATTTATACG
79	AT	5|72-281	N/A	5|368-377|+	5|798-807|+	5|346-355|+	N/A	6|483-494|+	N/A	N/A	N/A	0.4	0.5	ATTGGCTAAAAAATGTCAAGCTTCAAACCAATGGCACATTTCTTCACCTTATCTCCTGGCTCTACTAAAAGTTATTAGCTCTTAGTTGACCTTAATTATC	TGGCAGCTTGATGATTTTAAATCAAATGTCGATACAAGAAATAGAAAGATATCAACTTTCATGTTCTTAGTCCCTCAATTATTCACATTCTTTTCTATCT
80	AT	5|65-274	5|125-134|+	N/A	5|227-236|-	5|435-444|+	N/A	6|149-160|-	N/A	N/A	N/A	0.4	0.5	CAGCCAGCATTGTTACAGTTGATGAAAGTAGATGGAGTTGTCCTACAAGGCTGATCTGCACAAGGTTAAATTCAAATCAACATTGTAGAGTATACACTTC	TTGAGTTTGCTTCAGAATGTTTGAATGTATACTTAAAAACCAACAAATCCATCATCTTTAAACATGTTTTAACACAAATTTTGCAAAGCAAACACAAGAT
81	AT	5|90-299	5|399-408|-	5|197-206|-	5|326-335|+	N/A	N/A	N/A	3|446-451|+	N/A	N/A	0.8	0.5	AGGGCTTTACCAAAGAAATTTACTTAGAACAATCGCGGTGGCATGGGTATGTATCATAACTCCATTGCTTAATATCATATAGCTTTTGTTTTGCATAATA	CCTTGCAAAGCTGATGCTGAGTATTTATATCCTTGCCTTTTTGTTTCTGAATATTTGTTTATTCTATTCAAATTTTTGTTGGTATCGATGTACAAGTGAA
82	AT	5|104-313	N/A	2|42-45|+	2|30-33|+	N/A	N/A	N/A	2|179-182|+	2|413-416|+	N/A	1.2	0.5	AGGCCTTCGACCCCTACTCCCATCAACATATGCTATGGAATGTATAACCAAACCCTCCCTAGGAGTAAAACCAATTCGAAAATTCCACTGCCAGCAAATA	TAAATTTCGAATACTTGCTGCAAGTGGAATACTACTACAACTATACACATAAGAAAGAAAATACCTTCTGCCACTCTACATAGTGTCCACTGACTCGAAA
83	AT	5|147-356	5|166-175|-	5|153-162|+	5|118-127|+	N/A	5|184-193|+	N/A	N/A	4|427-434|-	N/A	0.37	0.4	TATGTATTAATGTCTTTTTATTACAATAGATTTAATTTTATAGAAATATGAATAACATATGATAAAGACCTTTGTTGAGTCAAGAAATTAAAATTGTCTA	AAATTATAGTGCTGGATAGCTCATTACTGTGCAAATTTCCAAGTGTTATCTTTTGTTGAACAGAGAAAAGAGCCAACATCTTGGTGTGGGATTATTGCAT
84	AT	5|190-399	N/A	N/A	N/A	3|86-91|-	3|86-91|-	3|86-91|-	3|315-320|+	3|131-136|+	N/A	0.75	0.4	GCTCCGTTTATATATTTAGTCTTTTGAAATTCTCCATTGTGGTAGAACCTGAGAGAAAAGAACTTTTGTGCCATATCCTGAGAATAACATAAACATACAG	TAGAGACCATAAACAAACTGTTAATAATCAACAAATTAAACTAACTAATTATCAAACTCTTGCACTTTGTTTGTAAATTCATTTAGCAATTATTATTAAT
85	AT	5|135-344	N/A	4|359-366|+	N/A	5|562-571|-	N/A	5|94-103|-	6|152-163|-	N/A	N/A	0.63	0.5	TTTTATCATTTAATTTTATTTTCCAACTTATGTATCTATCTTTGTTGAAGAGAAGAACTTTGAGGGAACGATACACGATTCTTAAGTTGGAGAGAAGTCA	AGGCTGATTCATGAAGGTCCTGCTAGTTGTGTTGAAAATCTTCGAATGGATAGAAGATCGTTTTATAACCTGTGTTTTATGTTGGAATCCAGGGGGTATG
86	AT	5|96-305	N/A	5|271-280|+	5|226-235|-	4|526-533|+	5|97-106|-	5|185-194|-	N/A	5|204-213|-	N/A	0.35	0.3	ACTGCACTGACACCAAATAAAAAGATCCTGACGCACCAGCTTGTGAATGCTGGCATTAAATGAATGGTCCTGACTTAGTATAAGAAGGATGATCAGCACC	GATTGGATCTCCTTCTTGCAGCATCATATAATGTTTCCAGCAACGGCATCAACTGTTGATTTCAATAGTGTTATATGATAAGTGACAGCTGCATTGCGTG
87	AT	5|122-331	N/A	N/A	N/A	4|447-454|-	N/A	5|143-152|+	4|759-766|-	4|119-126|+	N/A	0.49	0.5	TAGGGATAAAAACATATCCCCTAAAGCTGAAAGTAGTGGCTATGTTCACAATCAGGAATCATTCACTGAGGTATATATACTTGCATATATTTTTAATAAA	AATCATATTATGTATATGTATTTTGACGTATTTATAAATTGGATTGGTTAGGGATCTCCTTCAAGTTATCGGATTGAACAATATACTCCAGAGACTGTGA
88	AT	5|148-357	5|675-684|+	5|138-147|+	N/A	5|411-420|+	N/A	N/A	3|10-15|+	N/A	N/A	0.8	0.5	CAACTTGCAAGCATTCAAAGTACAAGCTGGATACAATAAAAATCGATCGCGACTTTCATCAATAAGGCAAATTAATATCATATAAAGAAAGTATACGTAA	AAACAGAGAGTAAAAGCCCCCAAATAATACAAATCTATAAAGTAAGGAACAAGATAATAAAACGATATAAAATTACACTGAGGAATTGTTTTGACATATA
89	AT	5|194-403	5|283-292|+	N/A	5|192-201|+	N/A	N/A	5|92-101|+	N/A	6|257-268|-	N/A	0.4	0.5	GCCGGAGCTAAAACCTTCAAAGCCCAGTGCAGGAAAGGATGCTGACAGCCGAATATTTGCTAGTCCTTTGGCTAAAAAATTGGCTGAAGAGAATAATGTA	CTGAGATAAATAGAATTGGAAACCTTTAATTAAAAATATGATATCATCATACGTCGTGCTTCATTTATTAAGAGCTCCATATTTTGTCTTTAATTAGGTT
90	AT	5|129-338	3|94-99|+	N/A	3|192-197|-	N/A	4|99-106|+	N/A	N/A	4|267-274|-	N/A	0.75	0.5	TTTATATCAGTTCGAATTCTATATTAAGCGTAAGTTTAATGTGGTGTGAATGACACTACATTGATTGATCACTGTTCTTTACAAAGCGAGTTGTTATCTG	CGTTGCATTTTGCCGGATTATTCCTTGCAGGATTTAATGTGGAGACTGTTGAATACAAGAACATTAGCTTCACTGTTTGGGATGTTGGTGGTCAGGATAA
91	AT	5|261-470	N/A	2|51-54|+	3|186-191|-	5|125-134|-	5|434-443|-	N/A	N/A	N/A	N/A	1.26	0.5	ACTATAGATTCATGTTTTTTGGTTTTGATAAGGCCTTTTAAAGAGGTGCTATCTTCCATACATAATACAAATAACTTTAAATCTATGGTACAAATATGTG	ACTGATGCACAGAAGGAGAAGGAACCAAAAACGGAGAGGAATATGGTGGTTCCAAAATTAATAATATGGTAGTAAATGCTTTCAGGTAAAAAGACTCATC
92	AT	5|49-258	4|193-200|+	N/A	4|192-199|+	N/A	4|128-135|+	4|163-170|-	N/A	N/A	N/A	0.4	0.5	AAAGTCAGAATACCTAAATCCAATTTTACACATTAAATTACAAGACAAAAATATACAACTAATGATTTCGCATAAATCTTGACACATATAATTCATTTAC	TTGATGGACATAACATAATTTGCAAGTTAATCAAAATAACAAAACTACAATCAAATATAATTTCAACCACTACAATCTGATCAAACTTTACATGTCCAGT
93	AT	5|20-229	5|111-120|+	6|663-674|-	5|127-136|-	2|189-192|-	N/A	N/A	N/A	N/A	N/A	1.36	0.5	AACCATTCAACATTTTAAAAAGTTGAAGTATAAAAAATGTTATGAAATTTTAATCTATTTTGATTTAAATATAAGAAGTATAATTATAATTATGATTTAA	GTTAATCAAAATTTCTAATTTAGTGTTGATTTTTTAATTAAATTATCAGACAAGGGTATTCTTTTAAAATATGTTGTTGGAGTGGGTAACAGACAACGGA
94	AT	5|332-541	N/A	N/A	4|432-439|-	N/A	5|373-382|+	5|269-278|-	N/A	5|468-477|+	N/A	0.4	0.5	GAAAGATGTATATTCACAAAAAGTGAAAGAGTCAATTTTAAGGCACAGCTGGTGAAGCCACCTTCTATTTGTAAACAAAATACATGTCAACTTATTACTA	TGACTTGTTGAATAGTAATAATATACTTGTTGGTTAACTTTGTTTCTAGTTGAAATAGTTGACCATATAATAGTCATTGACATAATCTTGCCCCAATAGA
95	AT	5|232-441	5|348-357|+	5|477-486|-	5|498-507|+	N/A	4|94-101|-	N/A	4|359-366|-	N/A	N/A	0.47	0.4	AAAACCTCTGCTGCGCAAGTTTGGAAGTTTATTGAAAAAAAGGGCTTCTAGCAACCAGAAGTGAAAGACCAGATAAGTCCTGATTGATTTATTGATCGGA	GCGGTCTGTTAATGTAATTGTATCTTGGTAATTCCACAATTTCCATATCTTATTTTCTTTATTGGAAAGAATATTACTTTGATGCTCATATCATCTTTAT
96	AT	5|335-544	N/A	N/A	5|275-284|+	6|94-105|+	5|142-151|-	N/A	N/A	5|137-146|+	N/A	0.4	0.5	TATGACAATCCATTACTATATGAGAAGGGGTAATAATCTTGTAATCTGGTTTTATTTAATATTTATAATGTTATGATTCTTCAAACTTTACTATTACACA	TTTTCTATTGGCCAAGTCAATATCATTTTCTTTTCTTGAAGCTGGAAGAAGAATCTTAGCTATGTAATTGCCATTGCAAGAGATGGAGCCTATGATGTCA
97	AT	5|602-811	5|614-623|+	5|312-321|+	N/A	6|264-275|-	6|1452-1463|-	5|539-548|-	N/A	N/A	N/A	0.47	0.4	TGCAAGTAGGAACATGAGAACATGACTCAACTGATCATCTTGATTCTTGAAACAAACATATGTATCACAGCTAAAATTTGAAGCCTAACAAAGTTGGTGA	GATGACCACCAAATTTCCACCTTACAGTGTCATAGCGGTAAGTATAATTAATTGCACTTGAAATCACAGATGAGTAAATATCTCATATATATTTCCATAT
98	AT	5|567-776	N/A	5|398-407|-	N/A	4|351-358|+	N/A	4|270-277|+	N/A	4|401-408|+	N/A	0.49	0.5	TTTCGACTTGATCTCTTCTCAAACACCTACAAGAAAGCAATAGGTAAAGATGGTTACCAATAGGCAGAAAAGTAAAAATTAGAAAAGATAAAGGATCAAA	TTACATACCATCTTGAACCTATCCATAGTACCTGACATAATTCCCCTTGAAGCATCCATTTCATTTCCCTGGGTTACAAACAGAACAGCTTCAAATTTAC
99	AT	5|303-512	N/A	N/A	3|230-235|-	N/A	3|348-353|+	3|3-8|+	N/A	3|54-59|+	N/A	0.8	0.5	ATATAAAACTAATATATTCATACCGAAAACCAACAGCAATCATCCAAAAATCTAAATAACTTATGCTAGTGAGTGAAGAAACTAGAAGGTGCAATCAATA	ACATCTACAACTATACATAATAATACATATATAACAAAGAAATTATACCCTATAAGCACTATTATAACTGCGACTGAAAATTTCTCCATAGCCCACAAAG
100	AT	5|736-945	6|163-174|-	5|294-303|+	5|106-115|-	N/A	N/A	N/A	5|1432-1441|-	N/A	N/A	0.4	0.5	CTCTCATATACAGGATGATATTATCCCAAGACTAAGTGTAGCTTCTCTAACAAGGTTGAGGAACGAAATTCTTCAGACAGATTGGTATGAAAATCAGCTC	AATGTCCTCTAATTTACAACACGAGTCTTTGTTGTAACTGATTCTTTTCCAAAAAAGAAGTTGATGGTAGTATAAAACTACAGCAGGCTCATGTGGTTTT
101	AT	5|971-1180	5|296-305|-	5|209-218|-	5|100-109|+	N/A	6|254-265|-	N/A	5|120-129|-	N/A	N/A	0.37	0.4	TCAGCCATATGTCATAGATTATTAGATCTAGCTAGCCTTTGGAAGTCGATTAGCTTTACTTCTGCAGGCTGCAAATAAGTTTTTTTGACCTAGCTACGAG	CTGGTTTCCTTGTCATTTTTTTTTGTCTAAGATCTTGTTGCAACTTTCGATTAGGTTCTGCACAGACGACCACTTCAACGCACATGCCTGCTGCTTCTGA
102	AT	6|37-248	N/A	N/A	8|288-303|+	4|108-115|+	N/A	N/A	7|206-219|+	5|181-190|-	N/A	1.41	0.5	CCTTGAGAAAGAGATAGAGAACTCAAACTTTTCCGATTTCTTGATACCGCGTGCTCCTGATAAATTAAAAATCATTAAGAAACAACAGAGATATACATAC	CGATGATCAAAAGCGAAAACAGAAAGAACAGTGATTAGTACCGCGTTTGGGTGAGAAACAATAGGAGAAGAGTGACGAGTACGGACGTCTCTGATTCCGA
103	AT	6|13-224	N/A	N/A	5|181-190|+	5|263-272|-	N/A	5|489-498|+	5|239-248|+	N/A	N/A	0.4	0.5	TGAGGTATATACTGTGTATGGAGAAAATTATTTATGAATCAGCTACATAACAATACAAGTCCTTGAAGAAGAATAATTCAATGCAAGTAACTATCATCCC	ACTGTTGTCAGTTCAGGTGAATAATAGTACCTGTGAGAAGATCACTAGAATAATGAGTTGGGGCAGTCCAATCTCCACACATTTTGTGAGCTAGTCATAA
104	AT	6|53-264	4|122-129|+	4|255-262|-	4|576-583|+	4|115-122|-	N/A	N/A	N/A	N/A	N/A	0.8	0.5	AATTAGGATCACTCATAACCTTTTCCCGTTCTGTAGCTTCCTAAAAAAGTTCATACTTAATCATAGTTGAGACAAGTAAGCTACGAGTATATATCTGATG	TCATACATAATAAGCCAACAAATTAGGTCCATAGATCAATTTATCTGTCAAACTCGCAGTAGTACTACAATATATTCTTGACTGATTATGTATTAACTAA
105	AT	6|20-231	5|226-235|-	5|159-168|-	7|116-129|+	N/A	N/A	N/A	6|261-272|-	N/A	N/A	0.75	0.5	CAAACTATCAACATATAATAAAAAGAGAATTTAGTATCTGTTCTTTTTATAAGCTGCCACTGTATCTAATATTATATCAATAACTATAATGTACGTACTC	ACACAATTTACATACAAAGATAAGGTTTAACATATAGTATAGATTAAAACAAATAACTATTACTTATCTATAACCTTATCACACGTAACAATTTTTTTTA
106	AT	6|2-213	N/A	4|223-230|-	N/A	10|152-171|-	9|186-203|-	N/A	N/A	4|162-169|+	N/A	2.5	0.5	GTGCTCAAGATTTCCCTCTGGGAACACATGTTTTGGCAGTCTATCCAGGAACAACTGCATTGTACAAAGCAACTGTCGTCCATGCTCGTAAAGTAAGTGG	AGTTTACTTCACATGTAATTTTGAATTATCTTCACACTGATGAAATAACTAATGATAAATTCATATGGGCTGCTTGGTGGCACTTCTAACCATGACCTAA
107	AT	6|173-384	5|295-304|-	4|229-236|+	4|372-379|+	N/A	6|676-687|+	N/A	4|168-175|-	4|81-88|-	N/A	0.88	0.3	AAGCCTACTTCACCAATATTATCACGATTGTTGAACCTTCATGTTGAGCAACTTTTTATGACAAAACAATAAAACATATAATGCACGTGTGGGAATTCAG	AGTGCTAGACATATAAAGTAAACACTAGGGTGCTAAAGATACAGCTAAGTGTATATTAAGGTGCTAAATTGTATCTTTAGCATATATATTATAAATTGTG
108	AT	6|58-269	6|486-497|-	N/A	N/A	7|315-328|-	N/A	N/A	4|459-466|-	4|401-408|+	N/A	1.2	0.5	ATAAACCTTCCATGTCCTAAGAGCTTGGAAAAAGTCTTAGTAACACACAATGTCATAGTGGCACAGATAGATATCTAATATCTTCACATAGAACACACTC	GGAAAAATATATATAAACTGATCAGATGTATTGTCTTCATTATAAGGAGCAGATATTTGAGTTGAGATACCAATAAAGATATCATTTACAGAAGAATTTT
109	AT	6|21-232	5|107-116|-	N/A	4|109-116|-	4|392-399|-	4|351-358|-	N/A	N/A	N/A	N/A	0.8	0.5	GACTATGCATACATGGTGTGGATTACTGAATAAAATAAAAGCATGCATATAATAACATTTTCTGGCACAAACTATTCAATTAAAAGCATGCAACAGAAGC	TGCATGTACAAATCAGATAACAAAGCATGGTCAATATATTGCACATATAATACCATATACACGTAAAGACTGTATACCTTGAAGAAATTATGAGGCTACT
110	AT	6|300-511	5|175-184|-	6|285-296|-	N/A	N/A	5|144-153|-	N/A	9|89-106|+	N/A	N/A	1.47	0.5	AGATGCAGACTTGCCTGACAGACCATCTATTAGAGGATATTTGGGAGATTCACTTAAACCAGGAACCGTAATGCATCCACCCTGACGAGATGTAATATAA	AAACATGTTCAGTTGATTTATTATAATCATATAATAATTTTACCTAAATCACTTGATTATTACCCAACACAACATTAGCTTCGAAATGCCTGTCAATAGT
111	AT	6|605-816	N/A	6|95-106|+	N/A	N/A	6|502-513|+	N/A	6|109-120|+	5|182-191|+	N/A	0.4	0.5	CTATAAAAACTAGTTTTGACATCATTTTGTGGATCCAGGATTCTCTTGGTGTCCAAAATCGTCAATTGAGCACTAGATATACGTAAAACACACAGATTGA	ACACACATAGCTATATCATAAAAGCATAACAACATCATCAATTAAATTCAAATAGAATATGAATCGATTGCCTCTTTTTGTCACAGATCTAAAACTTTGT
112	AT	7|90-303	5|544-553|-	4|489-496|-	5|118-127|+	5|205-214|-	N/A	2|29-32|-	N/A	N/A	N/A	1.49	0.4	TGTGCTTTGTACATTTTGTCAAACCACCTTGTGAGAACGTTATCCTAAAATCTCGTCTAAGCAATAAAATATCAATACTATCTCCTCCCCGCTCGCTATA	CATGAATTGCTTCATAATTGTCCATAGTTTTTATGCGCAACTCTTGTTTGACATATAGTTTAGCGGAATATTGTTGTGATACTAGTTCAGAATATTTACC
113	AT	7|169-382	6|313-324|+	8|126-141|+	N/A	N/A	4|20-27|+	5|222-231|+	N/A	N/A	N/A	1.41	0.5	TATCAATATATATAATCCTAAATTCCTATTAATGTACAATATATATGAATCAGCTAGCTGGTAAAGATTATAAGAACAAGCAGTACTACTAGTGAGATCG	ACCCAATAAGCAGCCACCAAACCCGCGATCCCTGATGAAAGATGAATGACATAGCCACCAGAGTAGTCAATGACTCCCCAGTGGAATAAAAAGCCGCCAC
114	AT	7|268-481	11|101-122|+	8|243-258|+	8|269-284|-	N/A	N/A	N/A	N/A	5|225-234|+	N/A	1.94	0.5	TACAATGAAAACATAGTTGAGGCAGGCAACCTTAAACAACATGCAGTATTAGATATACTTCAACATACATATACATAAAGTCTACACATATATAGTTGCA	ACTGACCGTGGGAGTATCACATTTAACTCTGACAGAAACCCTAGCTTTCTTCGCGGGGTTCTGCTGCACTGAACCTTCATCATCTCCACTTGATCTCGCT
115	AT	7|211-424	8|227-242|+	N/A	7|199-212|+	N/A	10|108-127|+	N/A	8|377-392|+	N/A	N/A	1.1	0.5	GTCTCAACTATAGATGGCTTCTGCGATCAAAATTTGTAGACCATACTCTCTGTATATCCCAGTTCTTTGAGTATTCCAGTTAGCTGTAAGAAGAACCGAA	AAGAAATCCAAGGAAGATATCTGAGTAATCTCTAGAAAAATGTGTTATATTCCATATACCTCGCCTTGTGATCGGTCTTTTGCCTTGTCGCCGGATATAT
116	AT	7|151-364	3|265-270|-	N/A	3|413-418|-	N/A	N/A	3|195-200|+	3|268-273|-	N/A	N/A	1.6	0.5	GATCAACCCATCATAACAAAACCCAAAACAACTCTCTCTCAATAAAATTCAACTAACAGAGATAAATATATCCAAATCATGTGTACCATATAAGTGGTGC	ACACACACAGAAAGAAACCTGAATAATATAGTGGGCAAGGTCTGGGAAGTTGTTAAGAGAAACCCACTGAAGTGCATAATATCCATTGGCATCCGGAATG
117	AT	7|148-361	6|72-83|+	6|153-164|+	6|251-262|+	6|175-186|+	8|125-140|+	N/A	N/A	9|172-189|+	N/A	1.12	0.3	GGGCATTACCGAGCCAAGGCCTTTGAGTAACAAAGAAACTTGCAGACTTCAACTGAAGAGCTGATTCAAGCTCAGCTGCAATTTCCAAGCCATGATCTAA	AGAATTCCCAACAAGTATATTCAGAACCAATAAGGCAATAACTAAACTTTAATAATTTATTCAAGGGTCAATTTAAATTAACTGAATTGCACAAAAGACC
118	AT	7|494-707	11|590-611|-	7|268-281|-	7|1665-1678|-	8|94-109|+	N/A	5|100-109|+	5|91-100|+	N/A	N/A	1.88	0.3	AAGAGAGAGACCATTGATTCATCTATTCATTCAGTGACTAAGTTAAGATTTGGTTTAGAATCATGGTTAGATTTGTTTGACAAGTCTGGAGCTAGTAAAC	GGTCCCTATTTTTCAAAATGGAGGGAAGAAAAAAAGAGATTTCATATGGATATATGATGATTAGTTTATTAGTTTCCCAATCATTGAGTTGTCTTGCACC
119	AT	8|32-247	10|747-766|-	N/A	10|455-474|-	N/A	N/A	8|122-137|-	9|145-162|+	N/A	N/A	0.89	0.5	TTCGCCGGGAGAAGAATTCAGTTGGCAATATTATTAAATTGTAAATTATACGAGTTTGATGATTTCTACTATCTAGCGTCTTGGATGTTATGCTACTTAA	CATAGTGAAAGATGAGTAAATGATATATCATATATTTTTTTAGCCATTGGAAAAAATTCAGATATTTGCGAGCAGGGATAAATTGATTGTAGATGATATA
120	AT	8|26-241	9|152-169|+	N/A	N/A	9|169-186|+	7|423-436|+	11|144-165|-	N/A	N/A	N/A	1.33	0.5	GAAATTATATCTCAATGACAAAATAAATTTTATTTTAATCCTTGAAGTGAGTTTGGCCACTCGAATGCCCTACAACTTTAATATCATTATATGCGAAACA	ACACTACCATTTGTCTGTTACTTGAATTTTATTGGTGTTGATAACAAAGATAGCAAGTGCTACTTTTTAACGTGCATTATTTCAAGTGCTAGATAGTTGT
121	AT	8|209-424	7|479-492|+	7|174-187|+	7|238-251|-	N/A	9|520-537|+	12|403-426|+	N/A	N/A	N/A	1.8	0.4	TCGGAAACCTGCCTTCTCCCCAAGTAAAGCACAGGGAACGCAATATTTCCGGTGGTGGCTCCGGCGGCCGCGATTGTGTTGGTGGCCGTGATATATATAC	AACACTTTCATGGTTATTTACAATTTTACCCTTAATTTTTTAACGGAGTTAATCAAAACAGACGGAATTCATTTAAGTGTATTATTGTTATTTGTTTTTG
122	AT	8|440-655	6|191-202|+	8|431-446|-	N/A	7|99-112|+	N/A	7|106-119|+	N/A	N/A	N/A	0.75	0.5	ACATATTCTACTTCTAATTTACACTATGTTATGCATTTCTTCTATCATTGTCCACTCCAACAATACAATAGTAGCAAGCTTACACTATACAATGTATAGA	ACAAGAAAACAAACCTTCAAATGTATCTCCCCAAATGGTTTCCATTGCTTAAAACTCCCAACCCCTGCACCAAGCCTATAACTTTCAACAGCTTTCCTCT
123	AT	9|58-275	N/A	N/A	N/A	N/A	7|133-146|+	7|407-420|+	7|91-104|-	8|146-161|-	N/A	0.8	0.5	GCTTCCATTCATCATCTCTACAACCTTCTATGTTTGAAAATAATTAGCCAAACTACTCTCCAAACATGATAAATTGCTAGAGGCCGATGAACCCTAGACA	GTATCATATATCCGTTGGAATGTAATAATATAATAGATAAAAGTTATTTTTTAAATAATTACCATTGTTAAAATCCATGTCATGCCACCTGGGTTGCCAC
124	AT	9|42-259	9|192-209|+	9|155-172|-	10|182-201|-	11|114-135|+	N/A	N/A	N/A	N/A	N/A	0.8	0.5	ATTACTTTTCCTAAATATACACCGCCGGATAATTAATATACAGATAATTAGTGAAAGTTCCTCTAGATTCGCAACTTTCTCTCACACATCAGCGTGTATA	AAGTTTATGTTGGAGAGATCGGAGATGCAAGTCTTATCTTCGTAATAACACTAGCGGATGATGCAAGGAGCAGTAACTCATTGGCCATGCCGTGGTGACA
125	AT	9|137-354	11|573-594|+	9|197-214|+	N/A	N/A	N/A	N/A	11|112-133|-	8|326-341|+	N/A	1.2	0.5	CGATAGATAAACTTATGACTTATCAAAACATACTAATGTACTAGTACTAGTGAGAAACATCATTACAGATATAAACCAGAATACATTCACTAGAGATTAC	TACCTTTTTCCGCACTATTTTCACCATCTTACTCAGCACATCTTTCTCAACAACATACATGTGAACAAAATCCCCACAGTTTTGCATGACAGTTTCCAAT
126	ATA	4|132-343	4|265-276|+	4|271-282|+	3|143-151|+	N/A	4|196-207|+	N/A	N/A	N/A	N/A	0.4	0.5	AAGTGCTCTTTTTGCTTTTGCCTCGTCCTCTTCCTATATGAGGACATTTATATAAATAAAACTTAACGAAACTAGTTATTAGAAAGTTCAGAGAAAAATT	TACCTGAAGCAAAGGAAATAAAGTGTTTTGAAGTGCTCGGTTTTTAGCTTCATTCCTGTGTTTCTGATTCATACGCCTGATGGTATGAATAACATGCGAG
127	ATA	4|185-396	N/A	N/A	2|383-388|-	N/A	2|240-245|-	2|279-284|-	N/A	2|279-284|-	N/A	0.8	0.5	TGAAATGAATCTGGGCTGAAAACATGGCAAATTGGCAAGGGGAATACTTGCATGCTAAGTTGGTGCCATGGTAACAGTGGACATGAATGAAGAAAGAGAG	CTTATAGCTTCACAGAAAAGATAATGATGGATAAGTTTTCTAATCGAGTGTGTGATAGTAATTGTTAACTCATGTTTCATAAATAAATATCAAAGAATGA
128	ATA	4|521-732	N/A	5|374-388|+	N/A	N/A	N/A	4|387-398|-	4|493-504|-	4|1437-1448|+	N/A	0.4	0.5	GACTACTCATGTCTGTCTTGTTCTTTTGGAATAAATTTGGAAACTGAATGGTTATTTATTTTTGAAGAAAAGAAATTTGAATGGTTATGAATCATTATTT	TTATAAGCTAATATAAAATTAATAATTTATGAATACATACCAATGAGATGTATAATATTTCCAACTTTTGTTTTTGCTTGGTTGAATGGTAAGCAATGAA
129	ATAA	3|14-225	3|129-140|+	N/A	2|122-129|-	N/A	3|101-112|+	N/A	3|105-116|+	3|207-218|-	N/A	0.37	0.4	TACATACAATTACAAAATATTTAAATCATCAATCTTCGTAATTTTTAAAAAGTTATTTCATTTAATTGATTATAATATTTATATAATACACTTTGCTAAT	ATTTGTATAAATGTACCCAACTTTTATTAGAATAATAAATATCACGTCATACATAATATCATATGTAATAAATTTAGTTTTAAAAAATAGGATTGTTAAA
130	ATAA	3|125-336	N/A	2|73-80|+	2|296-303|-	2|31-38|+	N/A	2|75-82|-	N/A	N/A	N/A	0.4	0.5	AGAATCTTAATTATTAATATAAATAAATTAAAATAGATTCTAATCAACATAATTTAGTAGAATCCAATTAATTGTTTTACATAATTAACTCTTAATTAAT	AAATATACAAGTTTTTATTTATATATGCAATTAGAATTTAAATTATGTATATGCATGTTAATTTAAATATGGTTAGTAATAAAGTTTTGATTGATTTGTT
131	ATAC	3|125-336	3|370-381|-	N/A	2|187-194|-	N/A	3|458-469|-	N/A	N/A	3|314-325|-	N/A	0.4	0.5	CCATTTCGGTTATCTAAAATAAGTTATCACTTAAAAGTTACTTTTATACGTGTAAGTTATTATCTGTTTGGCTAGTATATCTGATACAAAATTACGTACA	AATAATAATAAAAGAGGTAATTGAAGTTGTGATACGGGAGTATAGTATTAATTAATAGTATTGACTAAAATATGTCAGGAAAAAACGTAGCTATTTTCTA
132	ATAC	3|117-328	3|159-170|+	N/A	3|259-270|-	N/A	2|344-351|+	N/A	3|227-238|+	N/A	N/A	0.4	0.5	GATATCATGCTAAAAGATTTGGAAGATCAGAAAATGCTGAAATCTAACCCTCCCTTAACTTTAGGCTCGGTTAATGTAAAGGGAACCCTCAATGAGGATA	CAGAGGGTCAGATATATAAGCCAGCTGAGACTTCTACAGAATATGAATGTGGGAAGGCTGGGAATGATCTGTCTCATGTTTCAGGTTGTGCAGAACAGAT
133	ATAC	3|181-392	3|238-249|+	N/A	2|114-121|+	N/A	4|145-160|+	N/A	4|208-223|+	N/A	N/A	0.75	0.5	GCAAACTTTGTACTTTCTTCGTCCTCACCATGATGATTTTTGTTCTCAATTCTTTAGTTACCCTTTCTGTTAACCTAAATGAAGGTCCATAGTTTTTCTT	ATGCATGTATATATACATATAATATTGAATATTTTTTTTACTCATAATATATATTTTTTAATAATATTTTTCACACACATAATATGTTCTTGTTTGATTG
134	ATAC	3|20-231	N/A	N/A	N/A	3|231-242|-	3|649-660|-	4|272-287|+	3|420-431|-	N/A	N/A	0.4	0.5	TGTTGATTTTTAGTGAAGAATGCAACAAGGATGTTGTTGCGGAATTGATTGGGATGCATAACTGCAGTAGTGAAGCTAAATTGAAGATTAATCTCGGTAA	ATATGTATATATGATATTTCAATTGCTATTAATTGATTTCGTTGGAGACATATTGTTCTAGTTATAATTAGCTGTTTAATTTTGGTTTCTCTGTGTGATT
135	ATAC	3|357-568	N/A	3|185-196|+	3|235-246|-	N/A	3|99-110|+	N/A	4|232-247|-	N/A	N/A	0.4	0.5	ATATTTAATGAACTTATTTGATGTTATGAGTAAGGGATTTTGGATTTTAATAATTATACATCTAAACAAAGTTCAGATTTCAATTATTGCATAATTAGTT	TAAACTTATCTCTCAGTTGAGCATGCAGGGTTGCTGATTGGTCACTCTCTTAATTTCAGGCAATTGCAATTGCAGGCTGTTTCTTAGATGAAGGTCCTAT
136	ATAG	3|13-224	N/A	2|541-548|-	N/A	N/A	3|123-134|-	3|135-146|-	N/A	2|280-287|-	N/A	0.49	0.5	TATAAAATACATATAATGTCAAAACATATTAGTATACACCTTGCTAAATAGCCATAGAATGAAGTAAGATACCCCCACCCACACAGACGCATACATACAA	ATGCTGGACACGATCCGTAGTTACAGTCGGCTATTGGTCAACTATTAGCCAACTCTAAATGCTTGAAATCTAACAGTAGACTAGTAGAGGCAACTATAAT
137	ATATC	3|107-321	N/A	N/A	2|238-247|+	2|193-202|+	2|98-107|-	N/A	2|108-117|-	N/A	N/A	0.4	0.5	TGAAATGCGACACTCAGAACAACCCTTGTGACGATCAGTGCTAAATTTTCATGGAAGCATGAATGCATTCCGAACTCGTACTGCATATATCACATCATTA	ATCCTTTCGTTACAGTAAAACTTAACCATTGTATGTTTTAATGCTTCATTATCTTTCTTACCCATGTCCACAAAAAGTAAGCCATCTGGAAAGCGTTCTG
138	ATATT	3|366-580	2|774-783|-	3|367-381|-	3|242-256|-	3|152-166|-	N/A	N/A	N/A	3|115-129|-	N/A	0.37	0.4	GTGAACCTGAGTCGAAGGGCAATTCCTATGTTTAGAATGAGAATGCAAATAATCATTTTAATAGCAAATTATTCCAGAAAGGAATGTAACAGGTGCATGC	TAACTCTCTAAGGAGTGATGATATTATTTTTAGTCTAAAGTAAAAGTTGTATATCTAATGGAGCAAATTGTTGCTTCTCTAGTTAAACAACTCAATTTAA
139	ATC	4|10-221	2|144-149|-	4|111-122|+	N/A	N/A	2|275-280|-	N/A	N/A	4|206-217|-	N/A	0.98	0.5	ATTCCTTTACAAACATTGCCTCATCGTACAAACTCCTCCTATCCTCAATCATTTGATCATCCTCCCTCTCACCCTCCTTCAAGAATTTAAGATCAAGATG	AGATTTCTCCTGATCAGCCTCTAATGTATGAATAGACTCCACGTACAAATCAAGATCAGCCCTAAATATGCTTCTAAATATCTGATCAACTTCATGGAAA
140	ATC	4|48-259	N/A	2|204-209|-	N/A	3|209-217|+	N/A	3|399-407|+	3|242-250|-	3|190-198|+	N/A	0.58	0.4	GATTAGCAATTCTAGAAGATTTTCTAATAGAAAAATCAGATGAATCAGAAGAAGATGATGAATGATGACTATCATTATTTGATTCTGAAGTGATAAGCAA	AATAAAAGGCTGAGGTTCAGTATGTGGTAATGACTAAGGAACTGGATGCATGTATACTTGAGATGAGTCTTTGTTAAAAGGAAACACAGTCTCATGGAAG
141	ATC	5|168-382	5|95-109|-	N/A	5|136-150|-	4|420-431|+	5|159-173|-	4|276-287|+	N/A	N/A	N/A	0.47	0.4	TTGATTGTGAAGACGCAAGCGGAACTACCTGATTATCAATATCCTCTACCTTCAATTTTAACTTTTGTTCATCTGGATCGTAATCAATTCCAGATTCAGA	AACACAGCCACTTTCAGCTTTATTTCTTCTAGCTCTACGACAACCACTAACACAAGTCTGGCAGACCGAGATTGTCCGACCGAGTTTTTCGCCGGAAGCA
142	ATCA	3|34-245	3|122-133|-	N/A	3|146-157|+	3|518-529|+	N/A	N/A	N/A	2|197-204|+	N/A	0.4	0.5	GCAGCTTCAACGTAATCTTCACAAGGAGTTTTACTATATAAGGTTTGCACAGGGAATGTTCTTCCTGGAATATGGAATATTGGTACACTGCAAAATGCAG	AATGCCAGAAATAATAGATAAAGATCGCACAAGATAACTGTTTCAACATAATAGTATTACCTCCCGAAAAAAAGTGAGAATTTTTCAGCGTTTAATGTGG
143	ATG	4|15-226	4|335-346|+	N/A	4|399-410|-	N/A	N/A	N/A	4|595-606|-	N/A	3|635-643|-	0.4	0.5	GCTCAAGTGCAATATATGTCATCGAATAGTAGAATGGCTATGGAGTTTATGAGCGGTCATGGTAATGAAAAAGTGACTAAAGAAGAGAATAATATTGATA	AGAATAAGAATAACAAGGATACGGGAGAGAGTAGTAGCTCAATGGCATCTTATCCACACCATGAAAATTTCAGCAGTTACCATCATGATTTGAATGTAAC
144	ATG	4|280-491	4|101-112|-	3|187-195|+	4|303-314|-	N/A	N/A	N/A	N/A	3|144-152|-	N/A	0.49	0.5	GATTTAGGTATCATCTTCTTAATTCCTGTGTCTGTTTTCTTTGTGCACAAGTTATTACTTGTTTATCGTAAATTTTATTACGAAAAGGAAGTCCATAAGA	AAGAAGTAATGACAGATACAAATAAGTATCATGTATCACGTGTACTTGATAATATGTTAGGAGGTGAAATCATGAAAAGACTCAGCATTTTGGATCAGGC
145	ATG	4|315-526	4|210-221|-	4|168-179|-	5|225-239|-	N/A	4|409-420|-	N/A	N/A	4|111-122|+	N/A	0.37	0.4	ACATATATTTTAAATGATACTAGTATAACAAAGTTGAGTACTACACACATCAATAATTATATATATTTTTATTTAAGTTTTTATCAATCGATGAGATTAT	AATGTAAATTTTATTTTAATTTATGTAAAAAGATATGTATAAAACTGCTACTAATAGTATTAGCAATTTTAAAAAATGATAATATTTTTAATACATAATT
146	ATG	4|103-314	N/A	3|121-129|+	N/A	4|49-60|-	N/A	2|330-335|+	4|254-265|-	N/A	N/A	0.8	0.5	CCGGAAACTCTATTAACACAGTGTCTTGAACTAAACAACAAAAAGGGGGAAGCAGTGGACGAAGGAAATAACTGTCATGCGAGTGAAGAAACACCTGTAC	CTCATCTTGAACCTGTAGATTTTGAAAATAATGGTGTACTTTGGCTCCCTCCAGAACCAGAGGATGAAGAGGATGAGAAAGAAGGTGTTCTGCTAGAGGA
147	ATG	5|155-369	N/A	2|107-112|+	N/A	N/A	N/A	2|353-358|+	N/A	2|205-210|+	3|100-108|+	1.17	0.5	CAATTGCGATTGAATTCTATTAGGAGGCTTTCAACTATTGCCCGTGCTCTTGGTGAGGAACGGACAAGAAGGGAATTAATTCCATTTTTGAGCGAGAACA	AGGTTCTTCTTGCAATGGCTGAAGAGTTGGGAGTGTTTATTCCATATGTTGGAGGTGTAGAGCATGCACATGTTTTGCTCCCCCCACTGGAAACCCTTTG
148	ATGG	3|149-360	N/A	N/A	2|152-159|-	3|277-288|-	N/A	3|137-148|-	N/A	3|111-122|+	N/A	0.4	0.5	CCTCGTGGGGTAGTGAACCCTAAAACACAAGGAGTATGCAAATTAAAAGACAATATTTCTTGTAAAAGGCTCAAACAACTACTATGCATTACTAAATAGC	ATTACTTCTCATCTGCACTGTGATACATAATAAAGTCAACTATAAAATAGAAATAAAGTTTTACGATTGTTAATGATATCATCATTCTTTAATCACCGTG
149	ATT	4|337-548	5|1253-1267|-	N/A	N/A	4|250-261|-	N/A	N/A	3|497-505|+	4|598-609|+	N/A	0.63	0.5	CCACGAACTCAATGAAGGAGGCAGCTGAGCTTTCCCTGCATGGCAGCGCATTGTCGGAGTAACTAACAGTAGATGTAGGAGACTCGTTGTGTATAATGCC	AGTGACAGTACTTTTAATGCATGGCTTAGTCATTGTCCAAGAACCATTCCATGCTTTTAGTATGTCAAGGCAAAGAGGTGGCGAAAGTGGCGCCATTGGC
150	ATT	4|75-286	4|379-390|+	4|431-442|-	N/A	4|166-177|-	4|170-181|-	N/A	4|189-200|-	4|261-272|-	3|187-195|-	0.33	0.2	GGTCTACAATGAACGTAAAATTCTTGCTCATTCGCTGAATGACACCAAAACAGCCATAGAGGAGCTGACCAAAGTTACATCTGTTGTAGTAATTATTATG	TGGCTACTTTTGATGGGCTTTGCCACAACCCAGGTCTTAGTTTTCATCACATCTCAGCTTTTACTATTGGTGTTTATGATTGGCAACGCTTGTAAGACTG
151	ATT	4|142-353	N/A	3|171-179|+	3|718-726|-	4|146-157|+	4|101-112|+	N/A	N/A	3|101-109|+	N/A	0.5	0.4	TGACTCTCTTCCTGCTGCTGATAGGCACTCAAAAAAGCAATTACGGATTTCAAAAAATACAAAAGTAGCTAGCTCTCATAGAAACATATAATAGACAATG	TATTTTTAACACGAGATTTATAAAAAAAGAAATGTACAAACCCCAGCTCGCATCTGATTTAGACCACCATTTGTATGTACTAGCAGGTAACCTCAAGGCT
152	ATT	6|316-533	5|585-599|-	5|143-157|+	N/A	N/A	5|131-145|-	N/A	N/A	4|113-124|-	N/A	0.63	0.5	TTTATTGAATTTATATGATAAAAAATATTCAAATTATAATAATTTAATATATATTAATAATAATTTTATTTAATAATTTTTTAATTATAATTTAAATAAA	ATCATTTTTTATAAGTATCATTCTTATCCATAATATATTAGTTATAACTAATAATGAATTAAAACAAAAGTTTTTGAGTTTATATTTCTAAAAGTACATA
153	ATTG	3|119-330	3|395-406|+	3|119-130|-	N/A	N/A	N/A	3|655-666|-	3|676-687|-	N/A	2|159-166|+	0.37	0.4	AGTGGCAACCCATGACATTAAATTACACATCAGGTACAACATCAGCTCCCAAAGGAGTAGTTCATTCCCACCGCTCCATTTTCATCATCACTGTCGACTC	GTCAGTACCAAAACAGCCAGTATACTTGTGGACCCTACCCATGTTCCACTCCAACGGATGGAGCTTCACATGGGGAATGGCGGCTGTAGGCGGCACAAAC
154	ATTG	3|477-688	3|675-686|+	N/A	2|683-690|-	N/A	3|130-141|-	N/A	N/A	3|332-343|-	N/A	0.4	0.5	AACAGGTTTCCCACCATGTTGCAGAGTTGCTGAAAGAAGCTGGGTTCATCTTGAGTACTAATGATTCTGATATAAGTGATATAACGAGGTTAGGCTGGTT	TTATTAGTTATTACACATGATGTTGGTGCTTAACACTGACTCTAATTTAATCATGAAAGCTCACCCAAGCTTGGCCAGGTGACTTTGGACGCCACAGTGA
155	ATTT	3|9-220	2|317-324|+	N/A	3|318-329|+	N/A	2|249-256|-	3|311-322|+	N/A	N/A	N/A	0.49	0.5	AGAAATGAAGTTGTTTTTAGAGAGAGAAAGCAGCTGTTAATTATAAAACCAAACTGCTCACTTTAACACCTTATATTGTGACTTAATTACATGAATTGTA	TCATATCATGTATTAATGTAGGTATAAACATACCTATACATATATATAATTGGTTTTTTGTATTTTAATTTAGATATGTTAAGTTGTAAATATTCAAATT
156	ATTT	3|90-301	3|579-590|-	3|250-261|+	3|484-495|+	2|222-229|+	N/A	3|96-107|-	3|122-133|+	N/A	N/A	0.35	0.3	AATAATACATACATCAAGGAAACAACACATAATCACCAAAAATGTCATTCATAGCATGTAAAAGAAGCATATGCAACCATGTAATAATTCATATAACGCA	TTTACTTTTGATACCTGGAAATGAGGGCTATTAAGGCAGTGAGCTATCTGTTTAAATAGTAAAACCATGCAGCGCTGAAATTCTCCTCCTTGTGTAGCCT
157	ATTT	3|77-288	N/A	2|164-171|+	2|155-162|+	N/A	3|104-115|-	N/A	2|154-161|-	N/A	N/A	0.49	0.5	TGGGGTATCTTATTATTATTTTTAAGTTGTGCACCATTTAAACTTGCTTAAGTTGTAAGATAGTCGAGATATTTTCTGATTTGTCGAAACCTCACATTAC	ATATGACAGGGTACAAGTCGACCAGCGCATTACCATGTTATTTGGGACGAAAACAATTTTACAGCAGATGGAATCCAGTCATTAACAAACAACCTTTGCT
158	ATTT	4|74-289	4|240-255|+	3|168-179|-	N/A	N/A	3|466-477|-	N/A	N/A	4|677-692|-	N/A	0.49	0.5	GACCATGTTTTACAATTAAATTGATTTTTATTTGAAAATTGAGTAGAAACATAATAAGGTTATGGCCTACACAATCCCATCAAGTTTAAGTAACATTATA	TTTGTTGATGGTCTACATCTTGTTTACCTGCATGTATTACAATGCATCTAACTGCTCTATTATGTTTTCACAAGGCATATTGCTTTAATGCTGACAAGGA
159	ATTTT	3|90-304	N/A	N/A	3|134-148|+	3|263-277|+	N/A	2|585-594|+	N/A	3|366-380|-	N/A	0.4	0.5	GATCAGCATCTACATAAGTGATGTTAATTCATAAGACGCAGATGATGATACTGCATCACAGAACATCTTACAAATTTATTGTCTTCCACTTGATGTGCAA	CTGCTAAGTGAAAATAATCCGACCTGCCGGATTCATACCTGCGACCTAATGCACAAATTAGAAAGAAGAATCATACAAAATCCTAATTTTTAAAGTTTAC
160	ATTTT	3|518-732	N/A	3|308-322|-	2|303-312|+	N/A	N/A	3|110-124|-	3|407-421|+	N/A	N/A	0.4	0.5	ATCTCTTTGTAAAGTTGTTGTCTCAAAGCACCATTTCTCGACATATAGTTCACAATGTATGCCCGTTGACCTTCATATGGTGTAATCACCCCAATCTGTC	AGGCATAATGTGGCAACTTACTTAAGGTCCACCAACCGGAAAGAAAACATAAAATGGGTCAGACAAACCAACCTGACTAGGAATTACGCCACTTTTTAAG
161	ATTTT	3|238-452	N/A	3|257-271|+	N/A	2|191-200|-	N/A	3|149-163|+	3|693-707|+	3|209-223|+	N/A	0.37	0.4	ATTACCCTGGATGAAGAAGATTTATTAGGTATAACTTACAAATTTTCCCATTGAGCTTCTGAAAACAGTGGACCTGCTTTAAATTTCTGAGCTAACTGCA	TTTATTAATGATGCAGGGTCTTTGCCAACAGGGCATATGAAAGCTGAACTCTGATCGCATTTTTGCTCTAACTGATTCACAGCTTTTGCCATTCTCCTGT
162	CA	13|368-593	N/A	9|107-124|-	7|143-156|+	12|293-316|+	N/A	N/A	9|209-226|-	N/A	N/A	2.19	0.5	AGAAGTTGCTTGAAACCTGCACTCTACTTTAACTTCAGCACCTAAAGTACAAAAAATGAAATTGTTGTTCAAAATTTTAGGACCCAAAAATCTGTATCAG	CCTGGGAGGAAGTAGCTGCTCCTGGAGAAGGTGTTATTGGAGCAAATGTCACAATACACAATGCCCATAACTGTGATTTGTGGGAGTGGATGATGAACTC
163	CA	5|4-213	N/A	6|86-97|-	5|1402-1411|+	5|139-148|-	N/A	5|158-167|-	N/A	10|15-34|-	N/A	1.83	0.4	AGTATATATCATCATCAAGAACAATAATTACTACATGTATTGCCAACAAAAGAGAACAACCCTTCTTCATTAATCTCAAATCTTGAGTACAATCAATAAT	GAGTATCAAAACCATACACAAGAACAAACAACCTAAAAAGAATGAAGAAATACCCAAATTCAAGAGTCAGTTGCATCTTCAGTTAGCTCAGTAGAGCTGC
164	CA	5|49-258	4|254-261|+	5|165-174|+	4|190-197|+	N/A	N/A	4|362-369|-	N/A	N/A	N/A	0.49	0.5	TAAGTGCAATAAAGAAGGGGTCCATTCTTAACGAAGAAAGTGAAGAAGCTAGAGAGAGAAGAGAGGTGCGCACGTTAAGAATCATCTTTCTTTACAGATT	ACACACAATAGATATATACACATTTCTGTTTTATATTTAAACATATAATTTCTTGTTCAAAACCCTTCCAATTTAGAAAACCTCCATTAAAATTCCACAA
165	CA	5|50-259	N/A	N/A	5|148-157|-	N/A	6|818-829|-	6|112-123|-	6|111-122|+	N/A	N/A	0.49	0.5	TGATACAAAAAACACCCTCCACTATCTACTAATATTACCTCTATTAGAATTCCTCAAGTTTCAGGACTCGGGTAATGCCCTTAATTTCTTCCGTCTCTCT	TGTTATATGGGCTAATTTATTCAAAAATACAAAGCTCATAAGTAATTATTTTGTTTAGTTGATGATGGGGTCTTAAAATGCTATGGAAGAGCCAAGGTGT
166	CA	5|111-320	9|427-444|-	4|214-221|+	5|181-190|-	5|218-227|-	5|144-153|-	N/A	N/A	N/A	N/A	1.61	0.4	ATGGAAATGGATGTTAAAGGAGTATATAATACAAGCAAATAACAAACATATGAGAGGCCATGGAATTTGACACCAAGAGATAATATTGCCTACACACACT	TTTGGCATATCAATTTCCTCCTCTTCAGGATTTGATTTAACAAGAAAATGATGACACTCCTTCATTTTGTATTTTGTAATGAGCTTGAATTTTGATGAAA
167	CA	5|217-426	5|250-259|-	N/A	5|426-435|+	5|350-359|+	N/A	4|188-195|-	4|131-138|+	N/A	N/A	0.47	0.4	TTCAACGTGGTTGCCGCACCAAACACCAACACATGAGTACATAGTTCCAAGATCAATGCCAATTGCAGGTCCTTCGTCTCTTCCAGCCATTTCGCAAAAC	AAAAAAGTATATGAAAAAAGAAAGGCAAACCGAAAATGAAGAATTATTCTGTTTAGATGACTTGTGTAAAGAAAAAGAAAACAAGGAGTGTTGACTTACA
168	CA	5|159-368	N/A	4|188-195|+	4|360-367|-	5|408-417|+	N/A	N/A	N/A	6|471-482|-	N/A	0.75	0.5	CCAATTATACCAACTAAATCCCATATATGTTTTTTTGTCTATTTGACATGAATGGCATTTTTTAATATATTTTTTCTACGACCTTACAAAAACACACAGT	TATATATTTATATATATGCTTCCCTTTAACAAACAATTATAGTGGATTTCTCTACTTTAGTACGTACTATCACACTTTCACAAAAGAATAAAGAAAAAAG
169	CA	5|178-387	N/A	3|140-145|+	N/A	5|100-109|+	5|249-258|-	N/A	5|528-537|+	N/A	N/A	0.8	0.5	TAAAGACTCATTATCTGCCATTACAACTTTCTCTACTCTTAAGCAAAGCTCCCTATTTAAAAACTGAAACTTTCAGGTTCCAAAACTTCATACCAGTGTC	TATGTAACATATGTAGATACTACAGAGGTAGATAATACACACCTGAAATACTGTAGTAGAAAACTGCCATGCTTTGGAAGTTGGAAGAGATGGAGCTCCA
170	CA	5|236-445	5|262-271|+	N/A	N/A	5|468-477|+	4|155-162|+	5|271-280|-	5|601-610|-	N/A	N/A	0.37	0.4	GATATAGTTGTAATGCTTGAGTCACTCTGTTGTTCTATGCTTCCATAAACTGAATGGTGGCTCTGGGATTAAAAACCAAATGTCAACACACAAGTGCACG	TATTGGTGTTTACCTTAGTTCACCCATATATGCAACTATCAACTAAACCATGTATCAGACATTATGTTTAACTTGATTTTTTCCATGAGGTCCGTCTGAT
171	CA	5|375-584	4|64-71|-	4|135-142|+	N/A	4|64-71|-	N/A	N/A	4|64-71|-	N/A	N/A	0.4	0.5	ACTTGCTTGAACAACATATTTAGTTTTTATCTCCAAATTGTTTCCTTGATTATGACTATAATTATGATTTATTAGATTCTCTCGTGGTCATAAATAATCT	ACATGTTATTGATTTTTGTGTTTATATGTAAATCTCCTTCCTCTTCTTCTATTTCCTTTGGTGCACTCACATGCACAGATACTGGTGGCAATAAAACTGA
172	CA	5|251-460	N/A	6|269-280|-	5|200-209|+	N/A	6|148-159|-	N/A	N/A	6|309-320|+	N/A	0.49	0.5	ATAGTGCCACAAAATATGAAGAGTTCTTATGTTAAGACTGCTAATGAGTTGGTGGATAACATGTCTAAGGTATGTTCAACATTGTATCATATAGACAATC	CTTGGTTGAGTAAATGATTAACTGGTGAATTTTCTGTGTTTCAGTTTGATTCATTTGTGAGGTCTCCAAAGATATATGAATCATATCTGTACTATGAGAA
173	CA	5|668-877	N/A	N/A	4|348-355|-	N/A	N/A	5|130-139|-	5|141-150|+	5|150-159|+	N/A	0.4	0.5	ACAGTCTTGCTCGAGCTCTTTTTGGTAATATTATGAACTGTAAATCTTTTGTATTGTATCCGTTTTCTCACCCTATGGTTTCTTTTGTATCTCTATATCT	TACACACTTGGTCTTCCGTTTTTTAGGTCGTGAAGGACAACGACTAAACCTGGATTGGACAACAAGAAAAAAGATTTTATTGGGGATAGCAAGAGGCTTA
174	CA	6|18-229	4|809-816|+	5|152-161|-	5|196-205|+	N/A	5|349-358|+	N/A	6|126-137|-	N/A	N/A	0.69	0.4	CAGGAGGTTGCCTTTCTCCACTTTAGCTAAGCTGGCTATGCCCCGGACTGTAACTTGAGATGATTCGCCAACAAGTGCATTAAAAAAATTGGATCGCAAT	CGTCATTTTCTTGCAAGTTATCAAGTAACAATGGGGAAAAGAAAACTTACAGCTTATTATTAAGAACCACCACAGAATGGCAACCTCTCTTTTTGCCCAT
175	CA	6|91-302	7|471-484|-	N/A	6|291-302|+	N/A	4|135-142|-	N/A	N/A	4|197-204|+	N/A	1.2	0.5	GCCTTGCAAAAATATAAACAAAATATTCAGTTGAAACAAGAAAAAGGATAAATGGAATATAATTTCATCTTACATTCATTTAGCATTAAAACGTGTAATT	CGCACAGGCACAATATGCAGGCAAACCTTTGAATATATGAATATGATACTGTACTATACTTAAATACCCAGAGTAATAATTCAGGACCACAGTATTCAAG
176	CA	6|260-471	N/A	8|494-509|-	7|662-675|+	N/A	5|14-23|+	5|197-206|+	5|113-122|-	N/A	N/A	1.15	0.4	TCCCTTTCTTACTTTCCCACACTCTGTCCTAGTAGCACCTCTTCAATAATTCATCAAGCAAATTGTTCAAAATATCTTTATATTTTTCCCTTCAGAATAT	CCTCCATTTTGTTGATCAACTCCTGTGGTGTATGTGCAGAGAGCACAATATGTCTTGCTGAATCATCTATGAAACCATCTTCCACTCCTTTGTCAAACAA
177	CA	6|316-527	4|286-293|+	N/A	4|276-283|+	7|156-169|+	N/A	N/A	N/A	6|294-305|+	N/A	1.2	0.5	AACCCCATGCATAAAAATGTTAAAGATCAATAAATCATGACATCTTGTTTCATCTTCTTGCGAAATATAAACTGAAGTGGAATTTCCACCCAGAACAAAT	CTGCATATATGTATGTATAAAGCAAGTGTGCCTCCTCAGCCCCAAGAGTCTCATGGTGCACAACTGTTTTCCTCCATTTTAATACATAATGCTGCCAGCC
178	CA	6|66-277	N/A	6|303-314|+	6|745-756|-	6|232-243|-	N/A	N/A	N/A	3|132-137|-	N/A	1.2	0.5	CCCAAACCGAGGCTCCAAGTCCCAGTCAGACTCATCTCCAACCCAACTGCAAATGAACACGAAATATAGATGTACTGATTTGAAGTGAGCAGTAATCAGC	TATGAATATAGTTTGTATTACATGTATGTATATTTCAAAATATTTGGATCAAATACAAGATAGATCGAGCAAATAGAATTGTAATATCACGAGTAACATG
179	CA	6|386-597	N/A	5|118-127|+	5|156-165|+	5|144-153|+	N/A	N/A	5|190-199|+	N/A	N/A	0.4	0.5	TAATAATAGTAACATAAGAATAATCACAAACATCTATCCAATCAGGAATCATGTTAACAGTCACCTCATACTTAAATACTATGAATTAGAAACACTCTGT	AACAAAGAGCTATGATTGTATTACAGCAAGAATCATCATTTATATAGTGAAGAAATCAGTCTCAAAGGTCGATTTACAAAACCTAAACACAAAATTAACA
180	CA	8|6-221	6|208-219|-	8|325-340|-	N/A	9|278-295|+	N/A	8|414-429|-	N/A	N/A	N/A	0.98	0.5	GTTAGATGGAAGTGTAGCGCCGCGTGTCAAGATATGTGATTTCGGCTATTCCAAGGTAACAGATTTATAGATTATTCTTGGCTACGTATAGTTTTGCGCG	TATAGTGTATATACTAAGTTTGCTTTCCTCCCTTTCTCTTCTTTGGGAGGGTTTGGATTTTGTCAGTCATCAGTGTTTCACTCCCAACCAAAATCGACAG
181	CAA	5|77-291	N/A	N/A	N/A	6|99-116|-	5|357-371|+	N/A	6|415-432|+	6|346-363|+	N/A	0.49	0.5	GTCTGGTTTATGGGAATGGACAGAGTTGCCAGAGCTTGGTCCAATTGGAGACTTTCTTGCTTCCGCCGATATTGATAAACCGGTTTCTGTCTTGGTCATT	TCATGATCAAGTTCAAAGGAGAAATCCTTGGCCTATTTTACTGATGGTAATCTCTATACATATTGTCAAAAAGAACACTTTCCATTGCAAGTAGGTATCA
182	CAAA	3|34-245	3|111-122|+	2|177-184|+	N/A	N/A	2|250-257|+	N/A	N/A	2|261-268|+	N/A	0.49	0.5	AGAAGCACATTTTTATGTAACCTACAAAATACATAATTATCACATTTAAACTATCATAGTAAAGAATACATTTAATGGAAAAATTCAAAACACACGTAAG	GCAACCGATCCTCTTAGAACTAGATTTAAAGCCAAATTAAAACCTAAAAACGTACACGAAAAAAATAAATCAAAATAAGTAACATGCATAACAAGTAACT
183	CAAA	3|16-227	3|124-135|-	N/A	3|185-196|+	2|186-193|-	N/A	N/A	3|142-153|-	N/A	N/A	0.4	0.5	TCATTAATTTTCAATATATATACATATAAATCACATGACGATTGGCTATACATGCACACAGCCAGAACACTAATCACCGCAAATAAGGCAGACTTGTCAT	CTTAAATCTGCCCAAATGTCCATGCATGATATTTACTTTCTTTTATACTTAATAGAGAAACTAATAGAATAGGAACTCTGCATTTTTTATGTCTCTCCCC
184	CAAA	4|316-531	N/A	4|139-154|+	2|174-181|+	4|203-218|-	2|300-307|+	N/A	N/A	N/A	N/A	0.98	0.5	AGTCATAAATATGTTTGATCCTGTTTAAACTGAAACGATGGTCCCTGCATATAGTGTAAAATCAGGTGAAAAAACAATGGATGTCCACTGCTGAGACGGT	CATGCCGATAGCAAAATACAACATACACTAGGGCATATTTAGATGTTTGTAGAAATCCTAAAGAGTAAAACTCAAACTTATGTCGATAATTTATAATATT
185	CAAG	3|180-391	N/A	3|168-179|+	3|1089-1100|+	N/A	N/A	3|875-886|-	2|486-493|-	N/A	N/A	0.4	0.5	CAACAGCTGGACCATACTTGGTAACACCAAGAAGCAGCTCAGGAGGTCTGTTTAGAACAAATAAAGCTTAACAGGAGGTCGAAACTTGGAATAAAAAACA	CAACACCGAACAGGTTTTCAAATATTATATTCAAAGATTTACCTATACCACAGAGTAATAACACGATTTGTGAGATTTCCATTGTGATCATTGGAAAATG
186	CAATT	3|36-250	N/A	2|168-177|+	2|151-160|-	2|151-160|+	N/A	N/A	2|232-241|-	2|160-169|+	N/A	0.37	0.4	AGAAATAATGAACTTAAACTATCATAATGAACATGATATGCAATCACACATTAACAAGAAGGAAGCCCATTGCTTCAGAAAAATATTGATATCAAAAGAA	TTTTAACAAGATCTTTGACCCACAGGAAGCCCAGTATTTTCTTCAATGACTTGGCCTTGCTAGAACCACTCTTGCCTTTCTCATTATGCAGAGGTTCAGC
187	CAATTA	3|119-336	N/A	2|150-161|+	2|494-505|+	2|286-297|+	2|158-169|-	N/A	N/A	N/A	N/A	0.4	0.5	TTGTGACATCTTCCCAACCGTATTTCGGAGATGAAACAGAAGCCTTTACTCTAACCCAGTCACCAACCTGATTACATTCAAAACAACACAAAGTCAAAGG	TGAAGCAAAATACAAGCTTGAAATGATTTGACTTCACCCACTAAGCTTCACCTGAAAAAATAATAAGAGAGAAGAAATAAATCCTTATACAGCGAAGACA
188	CAC	4|30-241	3|128-136|+	3|172-180|-	N/A	N/A	3|122-130|-	3|655-663|+	N/A	3|502-510|-	N/A	0.37	0.4	CCTAGCAAAACACCTCCCAATAGATGTTGTAACCAAAATTGAAGAGCTCCGCCTCAAATCAAACCTAGCTCGTCGATCTCTCTTGTCTCAACAACACCAT	CATGACCTCACCGCAGACCTAGAAGATCAGAAAATACGAAGAATGAGACGAGCACTAGACTCTTCTGATGTTGAACTTGTCAAGCTCATGGTCATGGGAG
189	CACT	3|37-248	N/A	3|117-128|+	3|495-506|-	N/A	3|124-135|+	N/A	2|269-276|-	N/A	N/A	0.4	0.5	ATTCCTTCCCAACATAACCCCACTTATGTTTCCAGATATGGTGGTGAGAACATAAGACATTCCAACAACTCCCATTTATAAAGAGAACTCTAGCTGCCCA	CATAATCTTATGACCCTTTAACTCAAAAAAGACTTCTCTTACATTCTCATCCTCCAAACAACTATGGCTTTACAGAATATGCAGAAAGATGATCAAGATA
190	CAG	4|34-245	2|132-137|-	N/A	2|322-327|-	2|119-124|+	2|423-428|-	N/A	2|147-152|+	N/A	N/A	0.75	0.4	ATTATTAGGACTTTGGAGTTTCAATAATGTTTATGAAAGATGGGTTTCTGGTAGACCTAGAGTTTAGAGATATAGGCAGAGTTCTGAAGCTAGATTCTAT	AAGCAAACAATGGGAAAATATTGACATTTTGATCTTTAATAGTTACCATTGGTGGATTCATACGGGTCGTCTCCAGACGTACGCTTGATTTCACAATTTA
191	CAG	4|40-251	4|805-816|-	N/A	N/A	N/A	N/A	3|257-265|-	4|477-488|+	4|303-314|-	N/A	0.4	0.5	ATTTTTGAAGGAGGATGGCAGGTCTCTGCTAGATTGCCAAATGCAACTGAGACAAGATATCAAAGGTAGGAGTTTTACTAAAGAGGTGAACGGTGAACAA	CATCAGGATGAGAATGACTATATATGTTCAGTCTGTCACGATGGGGGTGAGTTAGTTATGTGCGATCGATGCCCTTCTTCATTCCATATAGAATGTGTTG
192	CAG	5|121-335	6|198-215|+	5|196-210|-	N/A	N/A	N/A	N/A	5|115-129|+	6|228-245|-	N/A	0.49	0.5	TGTATCTACCATGTACAGTGAAGGTAAGATAATCCTTTCCACTTCACAAGATACTGCTTCACAAATATTTGATTCGAACCCAGCTTAGAGCCATCAGTAT	TAGGCCGCATTTCACAGTCCAATATTTTGTCAATATCATTTAAGGGGCTAACCTGTGAGAACAACAACATCTCAGAGACCAGTTGTAACAAAAGATAAAA
193	CAG	5|58-272	2|121-126|-	5|414-428|-	N/A	N/A	5|132-146|+	5|95-109|-	N/A	N/A	N/A	1.2	0.5	GTACTAGAATTATTTGAAAACACCACATAATGAGGACGGCCTTGAGTAGAGGACCTATTCCTTTGTCCTTCCCTTCTAGAAAAATGACGCGCTCTACCCA	CTAAGTGTTGAATTATACGTTCTTCAAGTTCAGCATCAGTTGCACTGACTGGTAACTGTATTAAAGAAGAGCCCTGCGATGACTAATTTATTATCACGAG
194	CAGGAT	4|104-327	3|201-218|-	N/A	3|117-134|-	N/A	3|271-288|-	N/A	3|90-107|-	N/A	N/A	0.4	0.5	CCTTCATCTTGCTGGAAGTTTCCAGTTGTGCAACCATCATTGTGCATCTGTCCGTTTCCTTGCTTTGATCTCTTGTGCGGTCGATCTATCGGTTCAATGA	CTGAAGCAGCATAGTTTAGCATTCCCAGCTGCAAGTCAGTATTTGCTTCTGGGGGTGTCCATGAAGAGGGGCTTGCTGCAATAAGTGGTGTAAACACAAC
195	CAT	4|283-494	4|110-121|-	4|198-209|-	2|289-294|-	N/A	2|81-86|+	N/A	N/A	N/A	N/A	0.98	0.5	TGAATCTTAATGGAGAACCCATTTCGTAGGGCATAAGCCTTAAAATAGTTTTCAGCTTCCTCCAATGTCTTAAACATTTGATTCAAATAAGGCACAATTA	TTGATTTATCACCATCCACTTCAAATATATCTTCATTTTCCTCTACATCTTCGTTATCAAAGTATATATTTTCATCATTTTCATCTATATCAGCAGTTTC
196	CAT	5|168-382	N/A	6|766-783|-	N/A	5|402-416|-	N/A	N/A	3|374-382|-	2|438-443|+	N/A	1.47	0.5	TCTTCTTTATCAGCAAACATCTGGGGGATCATTTGCTTTGCTTTTCTTGCATTTATTCGAGCAGTTTTAGCTGGTTTGACATCTTCATCATCACTAGACC	CTTCGTCGTCACTTTCTACTTCTACATCAAGCAGATGAATCTCCTTATCTTTTGGACCACATCCCAGCCTCTGCATAAGATTGTCTGTTCCAGCTGCATC
197	CAT	5|97-311	5|125-139|-	5|477-491|+	N/A	N/A	N/A	N/A	4|351-362|+	5|251-265|+	N/A	0.4	0.5	ATGCCAAATAGCTATAATGATGAAGCCATGCAATTACTGATGTCACAAAACTACAATGTCTATCCTGTGATGAGGAGTGATGGTTTGACTCAAACACTTG	CTTCATATCAGAAAGATGAGAACCAAGATTTCTATTTTTACTGAGATGCTAATGTAGATGACTATAGTAGTAGGTTGACTACAATTAATGTATTTACTTT
198	CATA	3|205-416	2|175-182|+	N/A	3|215-226|+	2|171-178|+	2|241-248|-	N/A	2|155-162|+	N/A	N/A	0.47	0.4	TTCAAAACGCAATGTGGTGAAGCTCTGAAAATTTTAAAATAAAATGCAAGTCAGAAATCCAAGTCCATATTGTGATTGACCAAGCACCCTTTATGAATTG	GAGTTAAATTTAATCAGGAAGACCGTAGATCAATCCCGTGTTCTAGCAATCCACACAATTAATAATTGACTAATGTGAGCAATCACCATAACAAATCATA
199	CATG	3|192-403	N/A	2|659-666|+	N/A	3|214-225|+	N/A	3|173-184|+	N/A	3|544-555|+	N/A	0.4	0.5	ACCGATCTTCTGAAACCTTTGAGGCAATTCGAAACAACCTTGTGTGGACCATATTATATTACTAACGGATACATTGTCAGCAAAGAGAGCAGATATTATA	CCAAGTAAACTAGAAGAAGACATACAAAGCAAGTATATCAAAGACAAAAATTTCTGCAAAACAGCTAAAGGACTACTAGCATCAACTACTACTAACTACT
200	CCAA	3|106-317	N/A	2|660-667|-	N/A	2|442-449|-	2|185-192|+	N/A	N/A	2|229-236|-	N/A	0.4	0.5	AGAATCAAATATATGGTAGCATGTGAGTTGACAAGAATGCATAGTAAGGTCTTTAGTAGCATCATCTAATTTTGCTTCATTCAATATATTTTCTAATGTT	TGTTTCTCAGCTTAGCCAAGCCTGACCTACATAATGGAAATGACAAAGAAATTAGCAATGGTAGTGGTGGGAAAGAAACTGTTAGTGATGGAGAAGGTGT
201	CCCT	3|28-239	2|330-337|+	2|255-262|-	2|163-170|-	N/A	N/A	N/A	N/A	2|344-351|-	N/A	0.4	0.5	GTTATATTAATTTAGAAGCAAAAGATCCCTGTGAATCATGGACAATTGCAGATACCCAAAACAAATACAGAAAATTCCTAATGATGGAAAGTGGAAACCC	AACAGTAAAAGTAAAACTTGTTGCAACTCTCTTAGACCAATGCTCATATTTTCGTTTTTGCTATATAAACTTCTTGCGCGGCAAAAAAGTGATGATGTGA
202	CCG	4|56-267	4|261-272|+	N/A	N/A	4|204-215|-	N/A	N/A	3|130-138|+	4|206-217|-	N/A	0.4	0.5	TCCTGCCTTTACTGTCCTCGAAAGTTCTACACATCTCAAGCTCTCGGTGGCCACCAGAATGCTCACAAGCGTGAAAGAGCCGCCCTCCGCCGAACCACCA	ACGTCGTCAAAGCTGCTGAACATTCCACTGGAGTTCAACCTTCGATGGATCACTATTCGTCCTATAGTTGTCATTCGGGCCTCATGGATCCGAATACCCA
203	CCT	4|379-590	N/A	5|258-272|+	N/A	4|121-132|-	4|316-327|+	N/A	N/A	4|416-427|+	N/A	0.4	0.5	TTCAAATCTGTATCTAAACAGTGGTTATCTATCATTACTAACCCACGTTTTTCTCGTCTTCATAACCGTCTCTCGCCTTCAGTTTCTTCCTTTTTCTTCA	GCAGCAGCAACCCTGAGTACCAGTTCATTCCTTATGATACTAGCGCTGAAGCCCTGACCCCCTTCAAAAGTCTTAATTTTGTTCGTGACCCTTCAGGTTA
204	CCT	4|787-998	3|304-312|-	N/A	3|1380-1388|-	3|389-397|+	3|344-352|+	N/A	N/A	3|151-159|+	N/A	0.37	0.4	AAAAATGAAGTCCATGAGTAATGATAGTAGTAATAGCAAAAACAGCAACAACTGGTTAGATTTTACTCTCTCCCCTGACCATATGGAGCCTCCTTTAGAC	CAGCATTCAACCTCCACTGCAACAATTCCAACATCTTTTCATCTTCATCCTCATTTTAACTACCCTAATTTTTACTATGGCATTGGAGGTGAAAATCATG
205	CG	5|124-333	N/A	N/A	N/A	5|173-182|-	4|156-163|-	5|354-363|+	4|140-147|+	N/A	N/A	0.49	0.5	AGTGACAGCTTTTCTTGAGGAGAATAACGAAACATAAATTATACCAAGTTTGCTTCTGTGGTCAAGAAAAAAACAGTATAAACTCCCTAGCTCGTAGAGT	CACATTTCAAATTAGAAGCCAATTAATTCTATCACTACTATGGCAAGCTTAAAATCTACAATTCTTCAAGTTACCAGCTACTAGAACACACTATATACAT
206	CT	10|264-483	9|507-524|-	N/A	7|611-624|+	N/A	N/A	N/A	5|188-197|+	6|102-113|+	N/A	1.85	0.5	GTATTGAGAAAAACACATACAGTGCTAACACTAGGTACAAACTGAGGCAGGGGGGAGGCCCACACTCACTACTACATAGATTTAACACCAAATTTATGTA	AGCAGTACAGGAACCCTTAAAATGTATTGAAAGTGTAAACGATACAATAAATAAGTGAAAGTACCTCTGCAAATGCACATGCCCGAACAATATGTTTATG
207	CT	5|225-434	2|310-313|+	N/A	N/A	2|463-466|+	2|255-258|-	2|137-140|-	N/A	N/A	N/A	1.2	0.5	TCTTCTTTGCAATATATGCTCCTTGATTCTGACATGTTTTTGGTTTTCCTGTCAGCAGTGTCTACAAGGTCTTTGACCTAAAAAACTATACGTTTTTATA	GATAAAAATGTGCAAGAAATAAAAATCAGGTGAGGTTTCCCATGCATTGTTGTAGCCATGAATTCTTACCTCTTCTCACAGTAGTTGTAAGAGTTTTAAC
208	CT	5|47-256	5|403-412|+	4|338-345|+	N/A	5|274-283|-	N/A	N/A	5|132-141|-	N/A	N/A	0.4	0.5	TCAGAATCCTACTTTGATGACAAAATGTTTCAGTATTTGACTTAATCTTGACGTACATATAGTCTTCACTTTTTGCAAGTTGTTTACAATGTGTTTTCCC	TTGTGGTTTGAGTAATATTATTCTATTTTTTCCTCTCTTCCAGCAATTAGATGGGCTTTTATCTAAGGTTGAGCAGGCACCATCGAGATCAATGCAAGAT
209	CT	5|18-227	5|628-637|-	N/A	5|161-170|+	7|158-171|-	N/A	N/A	5|803-812|-	5|366-375|+	5|293-302|-	0.7	0.3	GATATTGCGATTGTAAATTCTGCTATGCGTGTTTTCCTTGAGGAAAAGGATAATCAGTGGTTAGTTTCGGATGCATCAATTGTCTATGGTGGCGTGGCTG	TTCTGCAGCAAGAACTAAAGAATTTCTAATCGGGAAGAGTTGGAATAGAGAGTGTCTTCTTGGTGCTCTTAAGGTATTGGAACAAGATATTGTAATTAAT
210	CTA	4|113-324	N/A	N/A	4|221-232|+	N/A	2|192-197|+	2|146-151|+	3|348-356|+	2|130-135|+	N/A	0.9	0.4	CTCACTTACAAAATCAGTCATTTTATATTTTGCCAATTCACTACTTGAACTTATAGTTTTTGATTTTTTACGTGAAATAGCTAATTGAAGTGCAATATCT	GTTTCAACAGGAATATCACGTGGTTTTGCTCCATATAGTGTTTCATAATGGTCATAGAATGCATTTAGTGTTTCATTAAATTTTTGAATACTAGCATTTG
211	CTAG	3|80-291	2|325-332|+	2|121-128|-	N/A	3|248-259|-	2|201-208|-	N/A	N/A	N/A	N/A	0.49	0.5	TCTTGATGTTTGTAGAGTATAGATTATAGGTGATAATAATAGTAATGAAAAATGAAGGTGCCCATTGGATAAGAACTGAGATATTTTTGGTACTCTGCAA	AGGATCATTAAATACTATGATCTTGAGTAGTACCAATCTATGAAAGTGTAAGCATGAGTAATTTGTTTATAAACAAACTTCAAGAAGCTAACCCCTTTGC
212	CTAG	3|31-242	N/A	3|451-462|+	3|321-332|-	3|103-114|-	N/A	N/A	3|185-196|+	N/A	2|184-191|-	0.37	0.4	CCAAATATTAAATAAGCAAAGAGACAAACAAACCCTTAAATCTAGAGTAGAGTGACAATGAAAAATGGAAATAATATTTGGGGGTGAGTGAGGATTTATT	GAATGGGATGTCTGGTCCATACTGCCAAAATCTTTGTCGGAACCTCATTGTCTTATATTATCTTTATTCCTCTTCTTTTAAATTATTTTCTTAACATTTT
213	CTAG	3|370-581	2|133-140|-	N/A	N/A	N/A	2|117-124|+	N/A	3|139-150|-	3|163-174|+	N/A	0.49	0.5	AGCACTTGGCAGGCTCCATTGCAGCTTCATTGTTCGCCTCTATTGTGCTTGTTTTGCTCATTCTCCTCTCTGTTTTTACACTTTCCAGAAAAAAACGCGA	TCTATCATCAAGATATGCAAATTGTTACGTTGACAGGAATACATTGTTGTTGTTATCGTAGAAACGTATGTAATGATCTTCATTTTAAGTAAATAATAAT
214	CTC	4|23-234	N/A	4|101-112|+	N/A	5|90-104|-	N/A	2|200-205|-	4|187-198|+	N/A	N/A	0.98	0.5	GTATATGTTTTTTGTGTTGAAAAACTATATATACCACGATTATCACCAATCGAATTGTTTAAATGATTATATTTGGCTTCCTGTTGTAAATATATATAAT	CTTCTCCTTCTTCTTTATCAGTGTCCTCGCCATAACCTTCGTTAGAATCGTATTCGCAATCACTATACAACACTCCTGGCGCAACCTCTTCAGCAAGGAG
215	CTG	4|3-214	N/A	4|595-606|-	N/A	4|357-368|-	3|173-181|+	N/A	4|222-233|-	N/A	N/A	0.4	0.5	TCAGCTACTGCCAATTTTCTTTTAGAACCTTTGTTGACCAACACATCTTATGGAAAAAATGTGGATGGTGATTGGACTTATTTCCTTCTGGACATTCCTT	GGGGAAATATGCACATCAGACTTTCATCAGATGTGAAAATTGAGTATCAAATATATGCTAGATGTGGTGGACTATCATCTCTTGATAACTGGGATTACTA
216	CTT	4|382-593	N/A	4|135-146|+	N/A	4|299-310|-	N/A	4|437-448|-	N/A	N/A	2|206-211|+	0.8	0.5	GAAGAGTAATGAAGCCAGCAATAAGACCAGCAGCTACAAGAGTCCCAACAGTCCATACAAATATTTTTCTACTTACAATTATACAACCAAGATCCACATA	CTGCTCATGTGGACCCAACAGCCAACTCTGTTGAGTCTCATCCAACGGCCGAGATAGCGCCGCCCGATCAATGTCCTGCAAATTCCGGCTCCGGTCATCG
217	CTT	4|23-234	3|209-217|+	N/A	3|893-901|-	3|287-295|+	4|112-123|+	N/A	4|236-247|+	N/A	N/A	0.5	0.4	CTATACAATTAATTAGGTTTAACAAGAAGCAAAAGAAATGTATGTACAAAGTTAAATTAGTAATCGGAGAATTCAGCACTTTGAATAACACTCAGAGCAG	GATCATCAAAAGCAAGTGCAAAATATTGGTTCCTTTCTTGTGGTTGAAACATATAAAACATGGCTGTATAAAATCCCAATGTTGCACTCTCTGATATCAC
218	CTT	4|938-1149	3|200-208|+	4|143-154|-	N/A	4|134-145|+	N/A	N/A	N/A	N/A	4|357-368|-	0.4	0.5	AAACCCCTTCATCTGTAGTTGTCAGAACACTTTCTTCTTGAAGCCGACGCCTCTTGCTCTGTCTACTAGGCAAAGCATCAGAATCCAACGGCTCACGCTC	AGATTTCTTCATCTTCTCATCAAGCTCAGGAGGTCTCCCCCTAAATGCACGGTCACCAAAACTCTTTGGATCAATCCTACCATAAAGGGACTCTGGCTCC
219	CTT	4|475-686	N/A	N/A	N/A	18|2088-2141|-	N/A	12|28-63|+	18|4191-4244|-	14|2-43|+	N/A	5.15	0.5	TCTTCTTGTCCTTGTTGATTTTGTATGATTGGCGCATATTGGGAGAAATCAACGAACAAAGAAAATGACATAGAAGGTCTCGATTGATTTTCTTGAAAAG	CTCTGGATGAATTTATCGATTCATCAAAAGGACGACTTTTACTTGTAATAACCGTATAGATATTACCTTGTGGTGATAACACACTAGAAGCATAGTACAC
220	CTTG	3|46-257	N/A	N/A	4|436-451|+	3|277-288|-	N/A	3|297-308|-	N/A	3|280-291|+	N/A	0.4	0.5	GTTTCAAGGCTGGCAGCCTGGAATCCCAGAAAACTCGGCTGTTTGGGATGAAGAATGGGACAAGTTTGATGATGAAGGTAATTCTTCTTTCAGTGTTTTA	CTGTAACTAATTTGTTCTTTTAGTAACTATCGTCGTTGATACTGTTTACATCATATGTATCATGCAATTAAATTTCATTGTAACTACTGACTAAAATTAA
221	CTTT	3|21-232	2|918-925|+	2|129-136|+	2|111-118|-	2|263-270|+	N/A	N/A	2|502-509|-	2|202-209|-	N/A	0.35	0.3	TTCCTTGATTTTTTCATATATTGCATCTTTATCTGGATATAATTTGTCTCCTGCAACAAATACATGAACCCCATCCTTCATAGTGACCCAACTACATCCA	ATCGCTGCTTTACTCATAGCACTTCGAGTCTTTTCCATATCTTCCCTCTTTCCTCCAAAGTTAGAAAGAAGCACATAGTTGGCAGAATTGTGAGGTTCTA
222	CTTT	3|285-496	3|233-244|-	3|202-213|+	2|153-160|-	N/A	N/A	3|95-106|-	N/A	3|245-256|-	N/A	0.37	0.4	TCATTTCAGTTGCCTGGTAACAAATATTGTACATTTAGAGCAAATGAACCGTTAAGAAAAGTGGCAGCTAGAGAGAAGCAGAAACACACTCAGTTGGAAG	TAAATCAAAAAGATACCAATGCAAGAAAATACCTCTATGATGAGATACCTGAGCATTACGTATGGAACGAATCAGATACAATATGGAATCCCCGGAAAAG
223	GA	5|2-211	N/A	N/A	5|516-525|-	N/A	2|151-154|+	5|171-180|-	N/A	5|94-103|-	N/A	1.2	0.5	GGCTTGCGAATATGATTTTGAAGTCGAGTGACTATTGTACGCGTGGGTGGTGGAAGTGAGTCTTGAGAAGAAGATGATGAAGATGTTGATATAATGGTTG	TAATGAATTATTGTTTGATGATAACGATGAGGGTACTGGACTGTTTGAAGATGCAGAGGGAGATGATGATGAGTTTATGGAATTAGCATCAGTGGGTATG
224	GAA	4|187-398	3|188-196|-	4|113-124|+	3|110-118|-	3|135-143|+	N/A	N/A	3|279-287|-	3|264-272|+	N/A	0.45	0.3	TTAATTACTAACTAGGGCTAAGGTGTCAACAAGGAAGACGCGATTGCCATTATTAGATTGAACCAGCTTAGAAAATTGGCGGGTAACGATTTGATTGACG	GTAATCGGGGAAAGGTTTGCGAGTCGGGCGAGAGCAAACCCGGATTTGGATCCGAATTGAGCGGCTAGTGTAATTGTAGCCTCTTTACGTGTCGCCGCAA
225	GAA	4|400-611	4|596-607|-	N/A	4|533-544|-	4|349-360|+	4|533-544|-	4|184-195|+	2|214-219|+	4|224-235|+	N/A	0.66	0.2	TGAATTGGGTTAATTGTGACTTGTGATTTTGATTTTGGCGAGGTTTGTAGGAAATGGACACGAAACGAGATGATTTAAAGGCCCGAAGACAAGCGTATTT	CAGGGTGCCGCTTGAGATACTCAGAGATGGCCCGGATGGTGATAAGCAGTATCGGGTTAATGGTGTCAGAAAAATGACTCCCCGTGAATTAGAAAAACTA
226	GAA	5|158-372	5|128-142|-	4|358-369|-	N/A	N/A	N/A	5|277-291|-	5|310-324|+	N/A	N/A	0.4	0.5	TTCTACAAGCCACTTCAAGCAACTTCATTTCCAGTAACTGTTTAACAACTTTTTATCCTAAAACTCAATCCCCAAGTATTCATACTGAGATTAATCATCT	GAGATGTTCAAGAATAGAGGCTTCATTGCTTGAAACACCTGTGTTATGGGCTGGGAGAGTTTGTATCCATTATGCCCTTTTGAAAGCTGGTTTGGCTGGA
227	GAA	5|480-694	5|436-450|+	N/A	5|513-527|+	N/A	N/A	N/A	5|400-414|-	4|113-124|-	N/A	0.4	0.5	CGGGTTTGCATCAAGGAGGGAATGTGGTCCAAAAGAGTGGAAAGTCTTGAAAGCTCTGGAGCCTATTTCAATGGGGGCTGGTGTTTTACCAGCTGGAAAG	GGTGAAGGAGATGAGATCATGTATATGAGGGCCAAGTTTGAAAGAGTTGTGGGGTCTAGAGATTCTGAGGCATTTTACATGATGAATCCTGATAGTAATG
228	GAAA	3|143-354	3|185-196|+	N/A	2|1481-1488|+	3|722-733|-	N/A	N/A	N/A	2|1350-1357|+	N/A	0.49	0.5	GAAAAGTGTTTTTATGCAGACCTTTGGGAACTTAAAACAGCCATGCGTAAAAAGTACGATGATCATAATAAAGCTGCAAAAAAAACTGCCAGAAATAAAT	AAAAAACAAAAAAGCTTCTCAACAACAAGAGGTAAGATGGAAAATGAATAAAAATCTATTCATGTTTGCATTTTTTTTCAAGTAAATACATGTCCACATT
229	GAG	4|16-227	4|131-142|-	4|574-585|+	N/A	N/A	N/A	N/A	3|470-478|-	N/A	4|642-653|-	0.4	0.5	GAATATCTTGGGAAAGTTGTTTTTGACATGAATGAAGTTCCAACTAGAGTTCCACCCGATAGTCCTCTGGCTCCGCAATGGTATAGACTCGAGGATCGTA	GAAAAGTGAGAGGTGAAATTATGGTGGCAGTTTGGATGGGAACTCAAGCTGATGAAGCCTTCTCAGAGGCTTGGCATTCGGATGCTGCTTTTGTTTATGG
230	GAGG	4|131-346	3|160-171|-	N/A	N/A	N/A	4|179-194|-	N/A	3|230-241|+	3|175-186|+	N/A	0.49	0.5	CAATTTCAATTCCTCACCAGAATTAAATATATAATACATATGAAACATTCTATCAACAAGTTATATATATTTATAACTAACAAATAAATATATACTCACC	GAGATTCACACACTAACAAATAATACTCATGTGTTTCTGTATCAAGTAAAGTGTATGCATACCTTTACTAACACTACGCCCAAGGTTATTGTTTGCACGC
231	GAT	4|124-335	4|478-489|-	4|225-236|-	N/A	4|184-195|+	N/A	N/A	5|106-120|+	5|244-258|+	5|423-437|-	0.49	0.3	AGTTGTCCATTTTGGAGTCTAGCAAAGGCAAGGGAAAGGTCAGTTGAGTCATATGGCAAAAGTGGATGGTTGTGATTTGATGCAATGAGGGGTAGCTGTG	CTTGATGGATGGTTCTGATTTTTGATGATGCAGAGGAATTAGATGATGAGGAAGATGATCTTTTGTTGTTCTTCCTGCATCCTCCACCCACCGGAACATT
232	GAT	4|285-496	2|133-138|+	5|169-183|+	N/A	4|122-133|-	N/A	4|154-165|-	N/A	4|437-448|+	N/A	0.9	0.4	TTCCAAAATAGATTCTTTAAACGATAACATTTTGTTCTGAATTTGTTTTCGATGATATATACACCGGAGTAATCATATATTGTTCTGCACCTCTTAACCC	CAGCGGAAGACGGAGCCAATTACAGAACCCTAATTTTGGTATATATAATCATGTATCATCTTTTGTATCAAATGTAAGTCTTTATTCTCTCAAACTACCT
233	GC	5|2-211	4|382-389|-	2|352-355|-	N/A	3|152-157|+	N/A	4|369-376|-	N/A	N/A	N/A	1.02	0.5	CAGTTCGAGTTGTCTTCTGGATTGTTCTCTTCCTTTGCTTGATTGGTGAGCTTGATTGACTTTCTACTAGAGCTTTTCTAGTGTTTGTGTCTTATATAAT	GTGTGTCTCAATCTTTGGAATTAATTAGCTCATCAACCACATTTTGTGAGTACCGGAAGAGCATTACTATGTAATGATTCTATGTTTGTTGGTCTGCCTT
234	GCA	4|146-357	4|353-364|+	N/A	4|253-264|-	N/A	4|106-117|+	N/A	N/A	N/A	2|206-211|-	0.8	0.5	GAACCCATCCAAATGCCAAGAATCCATGACATCTAGATTATTCTTGAAGACGATTTCATGCCAGCCCTTGTGGATACCAGTGGCAACAAAAACTCCATGT	TTGACAGAGTTGATAGGAAACTTATCAAGGTTGTACACACCAGATCCATTGACAAAGTAATCAGCAAGTTTTACTGGTGTGTTTGGTGTAAAATACGACA
235	GCA	4|174-385	N/A	N/A	N/A	4|127-138|-	4|372-383|+	N/A	2|210-215|-	4|363-374|-	N/A	0.8	0.5	TTTCACTTTGCCATGGTATCGCTGGTCTCTCTTATAGAAAACAGTGACTGCAGGAATTTCTTTGAGCATCATTCGTTCTCCCAAAATCTTGCCTATTTTT	ACGTCCCGAGTATTTTCCATGGCTGACCTTAAGGCCTTCTCTTGAGAGCTTGCAGAGGAGGCTACTGATGCTGTTGGAGTGTGGACTACTTGAGCGCTTA
236	GCA	4|3-214	2|186-191|-	N/A	N/A	4|283-294|-	2|253-258|-	N/A	4|131-142|+	4|138-149|+	N/A	0.94	0.4	TTTTTACTTTCACATTATGGTATCTCAAATATTCACTTTTTTATTGGTTGCTAATTAGCTGTTTGTGCTTTTTCATGTTGTTGGGCTACATTGTAGATCC	GCTGCCATGATGGATGATGAGTATCACACATTTGGTCGCTGCCGGCATGATAGGAGTAATTTTGGTGCCTTCAATTACAGAGAACATCCAAATTCTAGCT
237	GCA	4|208-419	4|168-179|+	4|255-266|+	N/A	N/A	N/A	4|431-442|+	N/A	4|225-236|-	3|143-151|+	0.37	0.4	TGGAGTGCCTGACTGTGACAAAGCCACTAGTGGTGGCACAGCTCCTTCCTGAAGTACTGTATTGCAATATCTACTGCTGTTAGTGCAGAGTTGTAAAAGG	TTCTCCTTCCCTCGTGCAGATCCCAGTTCAACAACTTCAACCAGGACAGGGATGCCGCCTTCTTGGCCAATTGCTGTCCTTCCCTCATGAATAGTAGCAA
238	GCA	4|140-351	3|158-166|-	3|224-232|+	N/A	N/A	N/A	N/A	3|306-314|-	4|115-126|-	N/A	0.49	0.5	CGGCGAGAAGAATTTTGAAGCAAAGTACCAAAATATAGCTATTCTTATAATTCCTTGTATCGATTTTCCAAATCCTTGTTGTTCTGGTTGTCCACCTCCT	CCACCACCGGCGGCAACGGCTGCCGTTACCGGCGGCGCCATATTCTCTCTTTGAACCGCTAAACCTAAAACCTAACTTGGATCGCAGAAGAGAAAGAATA
239	GCA	4|602-813	4|103-114|+	4|482-493|-	4|676-687|-	N/A	N/A	4|293-304|-	N/A	N/A	5|255-269|-	0.37	0.4	CCAGTGGTCTGGTTCACTGCGAATTACCCAGTTATAGGCTTCAGGAGATATAGCTTTTAAGCTTTCAGCACACCGTTCAAAAGCATCAAGTTTTGGTGCT	TACAAATCTTGAACCATGAGACGCCTAGCTTCATATGAAAATGGCTCCTTCAAATCATCGCTAAGTTTCTCGGCAAGATAATGCAGACAATAGCTGTGGT
240	GCA	5|38-252	N/A	3|270-278|+	4|106-117|+	N/A	N/A	4|288-299|-	N/A	5|407-421|-	N/A	0.75	0.5	AATCGATGGCCCTTTTTACCGGTTTAATACGCATTTTGTACCACCGTAGCTACATATACACATTTAGAGCTTTTTGAAGACTAAATGAAACAACTCCATT	GTCTGATGTATATACACACATCACAGTCACATAATCACAGTAGACACCTCAAAGTCAAGACATAGTAGAGATGTATTTCGCATATATACACACCTCAAAG
241	GCAC	3|156-367	3|125-136|+	2|131-138|-	3|160-171|+	N/A	N/A	2|355-362|-	2|115-122|+	2|162-169|+	N/A	0.49	0.3	GTATTATTGTACATTTTAGTTTTTATAATTAATATCAATAGAATCTCCTTTCTTTTGGGGAACAAGAACAAACAGAGTTTCAAACATAAGCAAGAAGCGT	AATATTATAGTGAAATTGTTTTCTTGGATCATACTCAAATATCAACTTATAAATAGCCTTTTTGTGAAATAACAATTAACAAATACTAAAAGGGTGTTTA
242	GCAGA	3|165-379	N/A	N/A	3|112-126|-	3|107-121|-	3|117-131|+	3|410-424|-	N/A	2|127-136|+	N/A	0.37	0.4	ATCATCAAAGATCATGAACAGATTATCTATTGGTACCAATTTGGAAGAGTCGCCTATGAGTGACAAATTAAGTATTGAACATGGTCTCATGGAGAAATCT	ATCACAACGGCACCATTAACAGTAACAGAGAAGAATGTTAGTCGTATGGATACTGCTGGCCAAAATCTTTTGCCTCCACAGATTGACTTGGAAGGGAATC
243	GCT	4|54-265	5|291-305|+	4|347-358|-	N/A	7|385-405|+	4|854-865|+	N/A	N/A	N/A	N/A	1.17	0.5	ATACCAATTATTATCGTTATGATGATGAGGAGGCGAAGGCCTCATAATGTGACTCTGATAATTCCCCGATATCTGTTGCTGCAATAATTCAGTTGCTGTA	GCACCTGATGGAAAATTAAACATCTCCGATAACATCCCACCTGATTGATCATATCCATGAAGCACTCCACCGCTCACTTCTTCGCCTTCTTCATCCATCG
244	GCT	4|47-258	4|874-885|+	4|91-102|+	N/A	2|92-97|+	2|321-326|-	N/A	2|40-45|-	4|263-274|+	N/A	0.99	0.3	TGGAATATTGATTTATTTTAGTAATTGGACGCAGGCTCAAATTGACGGTAATTATGTTCAAGCTAAATTCACAATACCTGCACGGCCAGCACCTTTGAAG	ACAAGAAGAGATGTGTCCAGGAATGATAATATTGCTGCTGATGCCGAAAAAGATGGACCAAAGCGGCAGAGAGAGCGTAAGTTCTTTTTGATATGTATGT
245	GCTA	4|20-235	4|104-119|+	5|554-573|+	5|91-110|+	N/A	N/A	N/A	N/A	3|543-554|+	N/A	0.75	0.5	TTGTAACACAAGATAGAGTTTAACTACTGCATATACACAATTGTAAGCAACTGTTGTATACAACTTTGATACACTTGCTTAAAAGATGCTAAAATATGAC	ATTGAGTAAAATATATACCTGTCGATTCGAGCCATAATGTTCTCGGAAGACATGATCACAACAGGTATTTTTTTCAGTTCTGATGAAGTCTGCTGAGAAT
246	GCTTGA	3|13-230	2|163-174|-	2|343-354|-	2|1158-1169|+	N/A	2|270-281|-	N/A	N/A	N/A	N/A	0.4	0.5	GACAAGCTCGAGCTCTCCTTAATAAGGATTCGGGCTCAAGCTTAAAAAACGAAATTATGATCAAAAGAAACTCTAATCAAGCTAAGCTTATAGTTGTTTG	CTCGGCTGGTTAATCTCTAACCGACTCATTTATAGATCATAAGATTTGATCTGTCATACAACTTTAAATATGAATATATAAATACCTTGCATAAAATTTT
247	GGA	4|219-430	4|170-181|+	4|148-159|-	N/A	4|179-190|-	3|204-212|-	N/A	N/A	N/A	N/A	0.4	0.5	CTTCAATTCTGGATCATTGAAGCTCCAACTTTTGCCAATGGAACCTTGACTGTTGTTCTTGACTTTCTTGATCTGAATTTCTTTACCAATCACATAATTT	TGAAAAGAAGAAGCATGATTTGTACTAAAACTTCTCAGATCATTCATCCCAGATGGAGCTGAATCTGTATCAACATAGTTATATCTATCCATATGTATAT
248	GGAT	4|312-527	2|287-294|+	4|103-118|+	N/A	2|219-226|+	2|142-149|+	N/A	2|137-144|-	2|301-308|+	N/A	0.9	0.3	TAGTGATAACCTAACAGTATCAAACATCTAATAGCAAGATGTTTTCTAATCTAAGTGTGCCAATTATGCTCATTACAGACAAATCGACTAACAAAGAGAG	GGACCTTATTGCATTTGATTCTATCAAGAAGTTCTGTGTCTTCTGAAGTCCAACCGTCAAGCGCACTTACTGCCATTATAACCACATCAGCACTCATAGC
249	GGATC	3|520-734	N/A	3|163-177|+	2|253-262|+	N/A	N/A	N/A	3|462-476|-	3|251-265|-	N/A	0.4	0.5	TTGGTTAGTCATTTGGCTGTAAGTTTTTTTAAATTTTCCGGCGAGATCTCCACAGCTTCGTCGGGAAATTCGTATCTGCTTCGCGCAGTTGGTTCTAATT	AATGGCGCCGGTTTCAGCACTTGCCAAGTACAAGCTCGTTTTCTTAGGGGATCAATCAGTGGGAAAAACAAGTATTATCACTCGATTTATGTACGATAAA
250	GGTT	3|150-361	3|428-439|-	3|491-502|-	3|160-171|-	N/A	2|378-385|-	3|134-145|-	N/A	N/A	N/A	0.37	0.4	TGGATAATATTTTGCCTTGATCTATATGTTTAGCATGAGTTTGTTCTTAGATATGGTTATGAAAGATTATAAAGGCCTTTTTGACTATATAATATGGTTG	AAGGTTGGTAATGAGTTAAAGGAAAAACACTAAGTGTAGTGTAGTCATAATGTGAAAATCTGGAAGGATCAGATTGTACCCCATGATCCCAGTGATGTGG
251	GT	5|19-228	4|288-295|+	N/A	4|481-488|-	6|96-107|+	4|216-223|+	N/A	N/A	N/A	N/A	0.8	0.5	TGTGCATATACACACAGGAAAAAGCTGCCCGTGATGCTTCAGATCCATATCGTTATATTGAGAGATGCAAGCCAATTCCTGATCCTCAGGTATTACACAC	TATGTTTTAATTTTATAGTGATACAAATTGTTGGCAATAATATGATATGTAATGCATGTTTTAGGTAACAGGATTAATATATGGCAATAAGACCAGAGTG
252	GT	5|11-220	N/A	N/A	3|268-273|-	4|250-257|-	4|153-160|-	N/A	3|32-37|+	4|642-649|+	N/A	0.69	0.4	GGATGAGACATTAATACAATTAGTGGTGTGTTATACATACAAATCCCATAAAACTATAATACACATGACAGAACAATCACTCTCACAGTTATACATATGA	GAGAGAGTGTGTAATACTTGTCTACAGCAGAAAGAACATCATCTTTCTCAATCTTTCCACCCAAATGAGAAGCAAGATCCAAAGCTCCACCTGTCGACAT
253	GT	5|16-225	N/A	6|307-318|+	5|95-104|+	4|535-542|-	N/A	N/A	4|114-121|+	N/A	N/A	0.75	0.5	CTAAAGCTAGCAGAACTGATACTGCCGAACTAAACCTTAACGACTCTATAAAACAAAAAACAAGCAACACATATAAAGGGGTTAGTTAAACCAAAAATTA	AGAGAGAGGAAGAGAGATCTACATTGGCTCATTAAACTGACCTACACGACGCAAAAGGACCAATGGAAGTAAAATGAATACAAGAGTGAAAAAGAGAGCA
254	GT	5|96-305	6|699-710|-	N/A	N/A	N/A	N/A	6|157-168|+	6|238-249|-	6|263-274|+	N/A	0.4	0.5	ATGTAGAACCTACAAGAGATGCCAAGTTCAGACATGACACATTGACTAAGATAGTTTAGAATAGCTTCACCAGGACCAGTGATACAACAAGAACTATGGG	GATAGGTAGATAAAACAATTTTGCCACTATTACAGTTAAGAAAATGGGAATACAGTAATCTGACCTTATAACTCAAGGAATATGTATCCATCCCACTAAT
255	GT	5|361-570	5|178-187|+	5|130-139|+	N/A	5|378-387|-	5|408-417|+	N/A	N/A	4|169-176|-	N/A	0.37	0.4	TAGGGGAATATGGACCAGTAATATAACAAAGAATAGAATCTGAGATTTTGATGAGGAGGGGGCCTATTGAAATTTTCCTACCTTGTGAAAGGGGTGCCGG	TATGATGTAAACAACCACATAGTCCATCATCTTTGAATATCATTTCATTTTGTTTTCCATCATGTTTCTTTCAATACTTACTTGCACAGACATTCATAGT
256	GT	6|4-215	10|597-616|+	6|358-369|+	6|967-978|+	10|102-121|-	4|173-180|-	N/A	N/A	N/A	N/A	2.24	0.4	ATGATTCTTATCAGACAAAGATTCCACTGCAATAACAACATAGGCATGACCATGAAATGCCGACACAGCCAGCACTGTGGCAACACAGTGAAAAATATAC	TTACATAAGAAACCAAAGAAGATTGACTATTCAATAAACAATCTAAGATTTAAAAGGAAGGGTATGCTAAACCAGATGTATCAACAATTTACATGCCTCC
257	GT	6|107-318	N/A	3|240-245|+	3|478-483|+	N/A	3|3-8|-	3|125-130|-	3|118-123|-	N/A	N/A	1.12	0.4	GAAACTGCAACGATGGGATGAAGCCCTCAAGGCATATACATTAAAAGCTTCTCAGGCATCTAATCCTCATCTTGTTTTGGATGCTACACTAGGTTTGTGA	TTTTTTTTAAATAATATTTTCTTTAATTCCACACGAGGTTTGTGTTAGTGTTACTGTTATCGTTAGGTGTCAGTATGCATTTCAGTTATTATAAATTCTG
258	GT	6|211-422	4|137-144|+	5|404-413|-	N/A	4|177-184|-	N/A	N/A	N/A	4|368-375|+	N/A	0.8	0.5	TTTGTGACTATGTATATATGTATAGTAAAATACATACAAATTATACTGCACATGAAGATATGTATATGAGAGAGACAGAATTGGTTGTACTTCAATGACA	ATGTATATGTATATGTGTGTGATCTCGACTATTTAGATTTGAGCATTATTCAAGTTTTCCTTAGATTTCTTCAATTTGTTATTGCAATTAGTATTTAATT
259	GT	7|116-329	7|631-644|-	N/A	7|697-710|-	N/A	8|412-427|+	7|429-442|+	N/A	N/A	N/A	0.4	0.5	TAGGAAAACTGATCTTGCAACAAGGAGTTCTTTCAAGGTATAACAATTAGGCATTGTAATCATCATATGACAACCTCAAGATTTATGAAAATTGAAAAAA	CCTTGTTTTAGTGTTTATTTTGATTTTGTTTTACAGTATGGTTGTTCCAGAGGGGTATATGGGACACCCTTTTTCTTCGTAAATGGTTTCGTTTTACCTG
260	GT	7|257-470	7|112-125|-	N/A	7|920-933|-	5|212-221|-	7|209-222|-	N/A	N/A	7|917-930|-	N/A	0.75	0.4	GTTAATCTCTACTCCCTCTTACAAAGGGTTGGCCTGGTGTACAGATGGAAGGTCATGTTGATGAATTGATCGTGTAGATAGCTTAGGAACAAGCATTGGA	TGTATATATGAACGCTTAAGGTTGTGTAATATTTAATATAGTCCTACATTTTTATGCGAAATTAGTTTTATGATTCACTATAGCTCTCATTTTAAACATT
261	GTA	6|158-375	7|305-325|-	N/A	7|222-242|+	6|1012-1029|-	N/A	5|435-449|-	N/A	N/A	N/A	0.75	0.5	GTGTTTAACCATTTCGTATAAACAGAGTGATTCTATCATGTTTCCAGTTACAACTTTAATCATGGTTAATATTGACATATTTGATGCAATCAATCTTGTT	GGAATTTCCCCCCTCCATTCGTTCACGAATTATAAATGTTAAGTTAGAGTGTTTCGATAATCTGGTATGATTTAAGTTCCCACGTATATATAGAGTTCAT
262	GTGG	3|505-716	N/A	3|348-359|-	N/A	3|144-155|-	3|101-112|-	3|300-311|-	2|462-469|-	N/A	N/A	0.37	0.4	GTTCAGCTCAACCCAAAATTCACATATGCTCACACCCTCTGTGGCCATGAGTATGTCATAAGTTCTCTTATCGTGACTCAGAATGATTCTAGAGTCTTTT	GTGCAGCTTTGCATGTTATCTTCAGCGTTATAAGCGTTTTTACTTTAATTTTTATCTACAGATTTGTGGCCCTAGAGGATTTTGAGAATGGAATCAAGAG
263	GTTG	3|1212-1423	N/A	2|936-943|-	2|1328-1335|+	3|641-652|-	3|1345-1356|+	3|103-114|-	3|925-936|-	3|895-906|+	2|772-779|+	0.47	0.1	AATGGGTGGAGGCCTCTCATACTCATACTAAGACGGCTATTAGAGCTGATCCGACCAGTCGAATAGATTGGCATGCCGCAAGTAAACCTCTCCTTATGCC	GTCCGTAGGTGATGAAGAGAGACCATAGAGCGGCCTTTGTTGCAAGGAATTTCTTTCTCGCCAAGGTAGAACAAAAGACGTGAAAAAAACCGGTCCGTAC
264	TA	10|19-238	11|106-127|+	N/A	N/A	N/A	10|613-632|-	11|90-111|+	10|139-158|-	N/A	N/A	0.49	0.5	GCAAAGGCATCAAATGTAAGTCAATTTACTTTATATCAAAGTTTAAGACCAAGAGCAAAGGACTAAAAACATAAACATGATATCTGATTATTACTGTTTT	TTTCGCTTCCACTGAATTTTTTTTCTTCTTGTAATTCTTATAACATTGTTCAAGTTCTCAATAGACTCCAATATTAAGATCTCATGAAAGATCATGCTTA
265	TA	10|200-419	9|896-913|+	N/A	11|419-440|+	7|330-343|+	N/A	N/A	12|174-197|+	N/A	N/A	1.72	0.5	CAAGTACACAAAGGACCTGAGGCTTTAGAGAACGATACATATGTTTCTTGATTCAAAGAACAACAAAACCCCATATCTTTAAGAATGTGATGATCACAAT	TTCAGCGGAATATGATTTTAGTACAATGGGTCTAGCCCCTTTTCTCTGTATGTAAATAAAGCCCAGTGGTGTTTTGGGATGTATACACACATCTCACTCA
266	TA	12|195-418	11|276-297|-	13|122-147|-	N/A	N/A	N/A	9|279-296|+	7|150-163|+	N/A	N/A	2.15	0.5	TTACAAAATCCCTCAAGTGCTCTTGACAGTTACTGAGACAGATACATGTACGAATAGATGATTAATAAAAAATATTATTACACACCATCAACCTGCTACT	TCATTATACAAACCTTAATCCTTCAAGAGGCTCCCAAGTATCGTCATCTGAATCATAACCCTTCCAACGCACCTATCACATATTTGTCAATTAGTTATAA
267	TA	5|6-215	N/A	5|198-207|+	5|143-152|-	2|25-28|-	N/A	N/A	2|33-36|-	5|91-100|+	N/A	1.41	0.4	ATTTATAAGAAATATGCATGAACAACAGTAGTACACATTTATACGTGCGAGAGGAGAATAGATGGAACAATGACAATGGTGCATATTAGCGGACACAATC	GTGAGCTACAGACTCATGCATTACATAGCTGAATATATATTAACTTGATGAAGGTAATTTTAATGGGAAAACTGCCAGTTTAAATCCAATATTTATGGTG
268	TA	5|5-214	5|267-276|-	4|98-105|-	N/A	N/A	5|401-410|-	8|60-75|+	N/A	5|321-330|-	N/A	1.25	0.4	TTGATTGGTGGTATAGTTATTGAGGAATGTGGCTTTTTGGTGTTTGGGTGAACTTATATATAAATTTGGTTTTGAATGTGTTATTGTATACTCCAATATG	CGCATATATTTTGTCTGATGATGTTATGATCAATAAAGGATATAACACCACTCTTTTGTAAGTTTTGGAACTGTGAAACAATCAATCACTCAAAAGTGAT
269	TA	5|20-229	5|253-262|-	5|139-148|-	5|181-190|-	N/A	4|247-254|-	N/A	N/A	N/A	N/A	0.4	0.5	ACTCACTCATATAAAATGACATTACTTACATGATTATTCAGATTGCAATCTATGGCAACTCCAGCCAGCTGATCCATACCCTTCCAAACTCAAGAAAATT	GAAATAACATAAATATGAAGTGCATGATTTATTGTATGTTTATTATAGCCATTTGTCTTCTCTGTTTACCACAAGAATCATTTTGCATTGATCGACAATA
270	TA	5|30-239	6|156-167|+	N/A	N/A	5|352-361|-	N/A	N/A	5|369-378|+	5|424-433|+	N/A	0.4	0.5	ATTCTTGATCTATCCTCACAAGGTAATACTGTAGGTCCATATTTGACTTATGATATTGGCCTAATATAAAAGCAAAGAGATCATCCCAGAGCTTGGATTG	GAAACAAGTTACTCTAAGGAAAGATCACAGAAAAACTAACTCCATCAACTTGTCATATGATTTCTACCTTGGAAATCCATGCGGATTCATAATCAAATCA
271	TA	5|5-214	5|155-164|+	5|277-286|-	N/A	5|166-175|-	5|138-147|+	3|250-255|-	5|99-108|+	4|151-158|+	N/A	0.7	0.2	CTTTATTGAATTTGTATATCCTTTGTCTTTCATACTCTATTGATTAATGGAGACGTCAAATTGCACTGCGAACATGCCTAATTTTCGCACACACAAACAC	AGTTAATACATGAATATGAATGTACAGTTCATATCAATTGATTTGATCGCTGTGTCATCTTCACACTGATCAATTAATTTTGCTATTTGCATTTGTTTAA
272	TA	5|30-239	5|685-694|+	N/A	5|324-333|-	N/A	5|102-111|-	6|173-184|-	N/A	N/A	N/A	0.4	0.5	CATGATAATCTTTATTCTCTAGGTTTCTCAGACATCAAAGTACTATATAAATCACCTTCGACAAACAATGGAGATTCATTAATGATATTATCTATCTTAT	GTTCACCTAGTAGGGTGTTTCAAAAAAGAATGGGGCAGAATCTATGTTGTATGAAGCAAACCAGTTCCGAGAATGATCACCTCACAAAGGCAAGTCCAAA
273	TA	5|40-249	4|216-223|-	N/A	4|125-132|+	5|338-347|-	4|82-89|+	4|193-200|-	4|130-137|-	4|176-183|-	N/A	0.43	0.2	TATAGAGTGGGCATGATGTTTATTATATAATTGTTGCATGTGAAAATTGCACTATAAGAGAAACCGAGGACCTTAGTATCTTGAAATATGGTCAGTTGTG	ATATATACGAGTATTCTAATTCCTCTAAAAAAATTTCGGATGCCTAATTCAGGTTGGAACGAAAAACCGTCAAGAGGAAAAGGGTTTTTGCAACTCTTAA
274	TA	5|34-243	4|281-288|-	4|94-101|-	N/A	N/A	4|103-110|-	4|161-168|+	N/A	4|114-121|+	N/A	0.37	0.4	GCATGTTTGCTTCACGCAAAGAGCTAAATTGGGTTTGCTTCATCGCGTGGCTTTAAAGACTTGATTTAGTTCTTTAAATCTTCAGTTTCTCTTTGACACC	AACCTCACCAAACCCTATTATCTTTCCAATTCAAGACCCCACAAAAGTCTCTAGCTATAGCTAATCATGGTATAATCACCTAGCTTTCCAATCTGTATGT
275	TA	5|96-305	6|245-256|-	N/A	5|101-110|-	N/A	5|168-177|-	5|287-296|-	N/A	N/A	N/A	0.4	0.5	AATAAATTCATATTAAAATCTTTCATGATTTAAAAATATAATTTAAAATAAATTATATAAATCTATTTACATGTATGTTACTTCTTGAGTCAAATTTATT	CACGAAATTAATAAATAAAAATAATTTTATATTAAAAAATCTAAATTATTATTATATGTGTTTTTTATTTTATTATGAGTAAAAAGTATAATTCAATTTA
276	TA	5|75-284	6|102-113|+	6|92-103|+	N/A	5|98-107|+	4|263-270|+	N/A	7|93-106|-	N/A	N/A	0.96	0.4	AGAATCCAAAAATAACTATATTTTTAACAACATTTCATAATTAATCTACAATATTAATATTTTATATGTAATAACATTAGTTTTTATTAGGATGCATATT	AAATTATATTAATATTTTTCTGTAGAATATGGATGCAACTTCATTAATATAAAGTTGCATCTATATATGTATAAAATTATGAAAATAATATGAATTAATA
277	TA	5|93-302	N/A	8|863-878|-	N/A	5|124-133|+	9|359-376|-	6|1-12|+	N/A	N/A	N/A	1.62	0.5	ATGTTATTAGTGTTCCACAGTATGTATCTGTGCTTATTAATGCTCTTGAGGGAAGAGACTGTTTGATGTCGTGAACCGCTCACAAATTGAGATATATGTG	ATTGAAATGTTTGAATGTCTGCAAAGCGAGAATGTGAATACTTTGCTAGTTTGATACATGTGCTGAGTCACTGACTACAAACACTTGATCAATGAAATAC
278	TA	5|99-308	N/A	N/A	N/A	N/A	5|191-200|+	5|106-115|-	5|210-219|-	4|136-143|+	N/A	0.4	0.5	TTCAGGAACAACCCAAGGGAAACTGGTTTTGCCGCCTCAATTGCAAAGCTTTTTTCACGACTTTGCAAAACCTAGTAAAAGAATTGCGAGAGAGGAAAAC	GACATTTTGCTAGAATCCCTACAAAAGGAGAAAAAAGATAAAATGTGAATGATCGTGACCAGTAAATCTGTTGGATGGAGTATTCCCCGCACAGAGCCTT
279	TA	5|73-282	5|315-324|-	N/A	N/A	N/A	4|290-297|+	5|107-116|-	N/A	4|288-295|+	N/A	0.49	0.5	CTGACTTCAAGTGATTCTCATTCTTGCTTTCATTAGTACAAACTGTAGTAGCGTCTTCAGAACCATTACCAATGCCATCCTCCTTTGGAACCCTATAAGT	AGAGTTCTACGCTAAATTTCACTTGTAATCAAGATGTAGTCGATGAAAGTACTTATATATCTTATATCATATCATTCATAAATGAAAAATGAGCTATACG
280	TA	5|45-254	5|746-755|+	5|495-504|+	5|491-500|-	N/A	4|495-502|+	N/A	4|123-130|-	N/A	N/A	0.47	0.4	TATAATGACATTTTAAATTTTTTATAATGTTGGTGATTAGTGTTTAGCAGACAAGGAGGCATGGGCCATTAAGATTACCCTATCAAATGGAAAATGTGTG	CACATAAAATAAGTTTGCATCCAAGAATTGGAAATACAGACATGAATATGGGAGGTGGGATGACTGACACAAACACATTGGCATATCAATAGATAACACA
281	TA	5|14-223	N/A	N/A	N/A	3|23-28|-	N/A	3|48-53|+	3|250-255|-	3|4-9|-	N/A	0.8	0.5	TTAAAATGATTATTTATATTTTTTATAGTATGATATAATCAATTTTTATATTAAATTCAAAAAGTAGATTTTAAATTATAAGAACAATATCTTTTATATG	GGATTTATATGATTTTGTAACTGCAATTGAATTGATTCGAACCAAGTTGAAATTTTTAAATCTCGAACTAATGATTATAAAAAATGTTTTGAGTTTAAAT
282	TA	5|99-308	4|257-264|-	5|326-335|+	N/A	5|320-329|+	N/A	N/A	6|866-877|+	4|423-430|+	N/A	0.69	0.4	ATGATTACCTGGTTAAAATGTTGTTGTAACTTCTCATTTGTAAAATTAATACAGAACTGCTCGAAACTGCACAAATAATAAAATGTTTTAAATATATATT	AGGACATGTTTAGACATAATACATCGATTTAATAAGTTACGAGTAATTAACCTAGCTGCGACAACACAATCACATGTCAAAGGAGGTTTAAAGAAAGGCC
283	TA	5|143-352	8|143-158|+	N/A	9|3-20|+	N/A	5|807-816|-	N/A	N/A	5|141-150|-	N/A	1.74	0.5	ATCTGGTAAAGAATTGTGATAAGATTGAAATTCAGTTCTATTAATAATCCTAATTGATTTATGATTGTCTAATTAACTATTAGATAGACATATATATAGG	GATCACAGGGTATTGTTGTGTTATTAATCATAAAAGAAAGAAAAACAGGGCTTGAGTTATAGAGAGAAGAAACAGATTCAACGATTTAAGCCACGACTTG
284	TA	5|49-258	N/A	3|159-164|+	3|213-218|-	N/A	N/A	3|412-417|+	3|105-110|-	N/A	N/A	0.8	0.5	TGATGAAACTTTGTTAAGGTTTGCATCTTTCTACTTATTGTTTACAGACCCATAAGATGATCTCTTGGTTGTTTTACATGATCTTTGTAGCCATATCCCC	TCAAAAGATTGTCAATGGTGATCTTTCTCCTTGTTTTGACAAGCATAAGATTGGAAAGGGAATTTCATAATGTTACAAGGGTTTACACACTTAATTTTAC
285	TA	5|123-332	N/A	N/A	3|1-6|-	5|95-104|-	5|450-459|-	5|117-126|+	N/A	N/A	N/A	0.8	0.5	TCGTTCTGCTACCTTTTGTGATTATGTTGAAACACTTGAAACCACAGTCAGCCGGGCCCTTACAGTTGCTGGGGACGCTGTCCAGTGAGGTAATATCTTT	CAATGGCGAACCTATATGGAACCCAGGGTATCCCATGGAGGACCTAGGAATTTGGGTTTTTGTTTTTAGATATTTGACCTTGGAATCTAAATATGAGTTA
286	TA	5|109-318	6|785-796|-	N/A	N/A	N/A	6|430-441|+	N/A	6|197-208|-	5|99-108|+	N/A	0.49	0.5	CCAGACCAAATGAATATTCCACTTATTTAACAACATTAAAATGTCCCTACAATTTTATTTTTGTCATTCCTTAATTACTAAGGTTGATGGGATATGTGTG	CTTCTTTTTTCACTAATATACTTTGTGACCCACATATCATGCATTAACAAAATTGAGACTACTTTCAAACTAACAATCTTGAATATTCTTTAATTTATTC
287	TA	5|104-313	4|962-969|+	4|217-224|+	N/A	N/A	4|213-220|+	N/A	N/A	4|115-122|-	N/A	0.4	0.5	TTTGGGTTCAGATCAAATTTTCTAAAAACTTGAATAACATTTTGAAAACCAATTTTACAACTCTTTAGAAATTTAAGTTGTAGTAGAACAGCAGGGCGAC	CACCAATGAAACAACAAATTTAGGAGATAATTTGAAAGATGATAAAATTTTAAGTGAGTTTTCAATATCAGATGAACTGAAAGTGAGCAACAAATCATTA
288	TA	5|98-307	N/A	5|186-195|+	5|230-239|+	5|257-266|-	N/A	6|206-217|-	N/A	N/A	N/A	0.4	0.5	CACCCATCATATTATCGAGAAGAAGAGCTTGTCTATGTTGTTTCTTTAATAGCTTCTCTTTTCTCTGCACAGATAGCAACCACCAATGTACAGCAATGAT	GTCCACAGAAATAAAATAATAACAATAAAGAATTTAATATAAGTTAAGAACTTGTGAACATAATGAACAAATTTAGTCAAATAAACTACCTTGTGGACCT
289	TA	5|144-353	5|189-198|-	6|260-271|+	5|457-466|+	5|185-194|-	N/A	N/A	5|216-225|-	5|410-419|+	N/A	0.35	0.3	TTATCTTATAGATTTTATATGTGGCTTTACATCCTCATAGTACAACACAGAAGAAAAAAAGAAGCATATAAAAAGTTTACCATACAACCATTTCTTCTAG	CCAAACATATATAGATGAAGACCCGCATGCACTAACATGTTACATGACCTAGAACTTTTTGAGGCCTTTGGTTAACATTTGTTCTCCTTAGCTTACAGTC
290	TA	5|25-234	7|468-481|-	5|83-92|+	5|152-161|-	5|259-268|+	N/A	N/A	N/A	N/A	N/A	0.8	0.5	CACCGTTGGATAATCACAGATTTAATGGTTGTGATGTAAGTGTTAATATTAAATGTAAAACGAAAGGAAAGTACTTAAATGAAAAAAAGAAAAAGAAAAG	CATCTAGTTACTATATTAATTAGATTGATTATAAAGTTTGTATTACAAATTTAAAATATATTTTAATTAATATGAGTTATTGTATTAATTTTAAACTTAA
291	TA	5|21-230	7|163-176|+	N/A	N/A	N/A	5|211-220|+	5|244-253|-	9|486-503|+	N/A	N/A	1.6	0.5	ATGTTTGGCATGATCCATAATAGTTAATTTACCTAGTCTAAATATGGAGCAACCACATATATCATTTATAACACTACAGATATTCACAAAATAGTTTATT	AGATTTTCTTACTTATGGGTATTTTCTGTGATGGTTGATGAACATGGAGAATGCACAACTTGTTTCCACCAGAATTTTGCAATGCCCATTTTAAAGTCAA
292	TA	5|291-500	N/A	N/A	2|227-230|-	N/A	N/A	3|146-151|-	3|107-112|+	5|187-196|-	N/A	1.2	0.5	CTTGGACATTTGAAGACTTCAAGAATGTCGCCGCTGAAAACATTGATTCCCTTCCAATATCTGATATTAATATGAAGGTGTTTCTGACTGTCTTCTCGTG	CTGTTCTATATGCTAGTAGAATAATAATCTTCAACCTCAGATATATTATGACTTGAAACATGGCGAGTCCAATAAAAAGTGAACTTCTCTTACAATACTG
293	TA	5|24-233	5|514-523|+	N/A	5|178-187|+	5|108-117|+	4|169-176|+	N/A	N/A	N/A	N/A	0.4	0.5	TAAAGGATGTGATGAAACTGATCAATACTTTTCAGTTTTCATGCCATATCTTGCAATTTCATTGTTCCTAACCAAACAAAGCTTAAGCATTTAATCTATC	ACTTGGTTGTACTTGTTGTTTGATAGAAACAATGCAGGAGTCATGGCACCTCCATTCACTCTGTCTAAAGATAATATAGAACAGCAATTTGCAGTTAACC
294	TA	5|254-463	3|762-767|+	3|314-319|-	N/A	3|194-199|-	3|522-527|+	3|256-261|+	N/A	N/A	N/A	0.75	0.4	TCCTCTTTAACACATTTTTCTTCATCATAAACTATTAAACAACACAATAATGCAGAAGAAGAGAGAGTAAGATGCAGATGATTACACATACCCAAGATCT	ACAAAGCTTTCCATTAATTTAGCATTATGTTTACATAAACAAATGCAAGAGAGGGTCGGAAATAATAAAAGCAGATGCAAAAAAAGAATTACCTCAGGAG
295	TA	5|244-453	5|235-244|-	5|176-185|-	5|914-923|+	N/A	N/A	N/A	N/A	4|674-681|-	N/A	0.4	0.5	GCTCTGATACTGTGTTAAGTTAACAGCTCACTCAAGGTAACAGTAGATGGACTTATATGAATCATATTGTATTAATTAGTTTTAATCGATAAAACTAGCT	GACATGTGTAATCAAGATCTTACAGGATTATGGAGTACTGATTTCCAGACAGCTGCTAAGACAGAGACAATATCAGTTTTATTAGTCGTGTAAGTGATTC
296	TA	5|131-340	6|209-220|-	5|229-238|+	5|372-381|-	5|209-218|-	N/A	N/A	5|183-192|+	5|261-270|-	N/A	0.35	0.3	AATATACATTCATGCAAAATGGTTTTAGAAGTCAGCAAAATGGTTTTAGAATTCAACAAAAAGCAAGTGGGTTGGTGAAGTAAAAGTATGTTGCATGAAT	TGAAACGTGATTGCATACTCAAAGTTCAAAACTTGTTTGGAACACGGACCCGACTTGGAATGGTCAAAGTCGACACAACATGGAACTTATTTATATATTA
297	TA	5|126-335	5|225-234|+	5|161-170|+	N/A	7|49-62|-	5|194-203|-	N/A	5|182-191|+	N/A	4|359-366|+	0.83	0.3	AAAATTCCAATAAAAATTATTGCTTCTTAAATAAGAATTTCTATTCATTCACCTAAAATGAAAAACGACATTGCAGCAATGTCTTAGTTTAGTTGTGTTG	TGGTTCAAGTCTTGGACATTTCTCAAACACCTTAAACAAATTGAGCTACAAACATCATAATCAACAAGATTGAAAATGGAGTCTTGGATTCGAGTTTTGA
298	TA	5|20-229	5|327-336|+	N/A	5|662-671|+	N/A	5|144-153|-	4|146-153|-	5|95-104|-	N/A	N/A	0.37	0.4	GGGCACAATATATTACAATTCTCTTCTCCTTGAGAATTATCTATCGTGTTTATTTTCCCAGCTACTCGGTGTAAGGGATATCATGTGATTACGTTACATG	CAGAAGCTAGAGATTAATAGTTAACAATAAACTAAAAGGCACTGGGCAGATGCCAGGAGTAAAAACAGAATCTGTAGGCTGTGGTAGTCATATTGCATAC
299	TA	5|252-461	5|220-229|+	N/A	3|282-287|-	N/A	N/A	N/A	3|44-49|+	3|168-173|-	N/A	0.98	0.5	TAATTAAACGAAATGTCAAAATATTTATATAGGATTAATTTTATGAAGATTATAAAAAAATAAAGATGTCAAATTATTGTAGCTTATTTCAAATATTGAT	TTGGTCTAAAGAATTATTAATCTACTTGAACTTAAAATTAAATATTACAAACATAAAATATTTATAAAAGTAAGGAAGAAAATATCGTATATGATGAGGA
300	TA	5|322-531	N/A	N/A	N/A	5|323-332|+	N/A	3|369-374|-	3|107-112|+	3|119-124|+	N/A	0.98	0.5	TAGAAATAGTTCGATCCAGTTTAAATCGCTGGCAAATGAATTTTCTCTTAGTATCAAACTTAATGATATGTATCATTTTGTTTTTAAGTGGTTGTAACTC	TCACCTTATAAACTTCAGCAGTTGAGCATGCCTCTGGGGGCTTTATGAGTACCATTGGTATATCGGACGGTATAGGTGCTGGAAGATCTTGAACAATCTA
301	TA	5|154-363	5|310-319|+	4|129-136|-	N/A	4|251-258|+	N/A	N/A	2|73-76|-	4|203-210|-	N/A	1	0.4	TGTTTGTGTCAAATTCTGTTGTTCAAGTGTTCACTGAATTATCATTGGTCCTCCAAATGACATGTTATGCTAACATGCTTATTCATTATTAAGGCAAAAG	TGTTCATTCCTTTAAATTGTCCTGTGTGTATTTTAAGAACTTGTTTTCTGTCTGTAATGTATTCAAGTTTTATAGAGAATTGAATTGCAATATGCTTTGG
302	TA	5|245-454	4|851-858|-	5|195-204|+	6|828-839|-	4|398-405|-	4|504-511|-	N/A	N/A	N/A	N/A	0.75	0.4	CTCTTACATTAACAACTAACAGTGAAGTCCAGCAGCTTTACCAGTCATGAAACTGCTAATACATATAGTCATATACACGTTTTGACAGCCTAAAGAAACT	CCCCAGTTCAACAATTTTACAAGAGCTAGGGAAGGAAGACTAAGTTGTACATGGATGAGGTAAATAGTCTGGCAGCAACAACAATTAAATAAAGGTTATC
303	TA	5|209-418	4|151-158|-	N/A	5|215-224|-	4|233-240|+	5|193-202|-	N/A	4|169-176|-	5|92-101|+	N/A	0.49	0.3	ATGTAAATTATAGAACTCAATTTGGTCTAGGTACAGATCCTTCAAGTTCTCCATTGATGTTTTAAGCTTCTTCATATTAGGAGTGCCTCGTCCCAAAAGC	AAATGAAAACGTGAGACACATTTGGCAAGATCATTTATCACAAGTATAGGCAATCCAAAATCAGTTAACAACCATATCAATTAATCAAATCAATCTACCT
304	TA	5|50-259	4|208-215|+	N/A	N/A	N/A	N/A	4|379-386|-	4|358-365|-	4|114-121|+	N/A	0.4	0.5	TTTGAAGCAAAGGTGATAGAACTAGTTAGGATTCTAATCAAGTAAGAATATTTGATTACTACCTCTTGAGATCTTAAAGCATCTCCTACAGTCATGTATC	CATGCAAAAAAGAAGTCACTTGCGATTGAAGTATGCTAGTGCATTAAAAATTCAATTTGTTACAAATGCCAAGTTTTAGTAAATGGTTCCTTTATGAAGC
305	TA	5|408-617	5|150-159|-	N/A	6|271-282|-	N/A	5|100-109|-	5|321-330|+	N/A	N/A	N/A	0.4	0.5	ACTAGTTCCATATGTGGTATTTCTGTGGCTTATAGCTTGATTTGTGGTATTATATTTGGAACCCATTACCAGTTGTGAGTGTTGTTGTGGGCCTTGTGGC	CAGTGATATACTCGTAGTGGATTGGTCTCTATATTATTGTTTCAGTTATGCATCAGATCTTCTGTCCAACATTTGTGCAGGGGTACAATAAAATTTACTA
306	TA	5|419-628	4|110-117|-	6|130-141|-	4|92-99|-	N/A	4|151-158|+	4|1717-1724|+	4|355-362|-	N/A	N/A	0.73	0.3	CACATGCTAAGACAAAACATATTCCTTATAGAGATTCTAAGCTGACATTTCTTCTTCAGGTTAGCACCTGGAAATCATTTTTGTTCTTATAATTCTGAAT	ACTTTGAAGCAATACAGGACTCATTGGGTGGAAACTCAAAAACAATGATCATTGCCAATGTCAGCCCCTCAATCTGGTGTGTTCCTAATTGTTATTTTTT
307	TA	5|440-649	3|299-304|+	3|367-372|-	5|96-105|-	N/A	N/A	N/A	N/A	3|283-288|-	N/A	0.98	0.5	ACCTCTCACCTGCAATTGAAATTTAAACTTTTAAATAGATTGACAATTCACATAAGCAATTTAAATTGAATTTAAAGATAAATACTTTATTCATATGTTT	AGTTTAGAGATTTGATTCAAATTTTGAATACAATACTTTTTTTGGGAGCAATGATAATGTCTTTTATAAGGGAAAAGAGTGATAGTAATTAATTTTTTGT
308	TA	5|185-394	N/A	N/A	3|252-257|+	5|132-141|+	N/A	3|258-263|+	N/A	3|257-262|-	N/A	0.98	0.5	CCCGGTAAAGTCAAGGATGTGTGGTTGAAACTGGTCAAGGATTTGCAAATCCAAAGGGACAATAAAAACAGAGGCCAGGTGACTGATCCAACTCATTTTT	TTTTTTAAAGTTTTGATATCTCATTATAGTGTTGTAAATTTGCGAAACACTAGTGTTATCACGATTGTTAACAAGAAATTTAAGTTGTAAATCCATGGTT
309	TA	5|574-783	N/A	3|633-638|-	4|239-246|-	N/A	5|276-285|+	N/A	N/A	5|151-160|+	N/A	0.8	0.5	TTCAGCCCTGATGGAAAGACGCTTGCTTCCACTCAGTAAGTTTCTTTTTCTAATGTAGGACATATATGATATTTATTCATGGAATCAAAATTATTGAAGG	CACATCTGTGGTTGCAGCGGAGACCATACAGTGAAAATAATTGATTGCCAAACTGGAAGATGCTTAAAGGTGTTAAGTGGTCACCGGAGGACACCTTGGG
310	TA	5|599-808	4|364-371|-	N/A	N/A	N/A	4|439-446|+	5|102-111|+	N/A	5|423-432|+	N/A	0.49	0.5	TGAACTTTCCATCCACTATCAACATTGAATATCCGAATGTGACCATCCTAGAGGAAATGAAAGGCCAAATTTGATCTTAATATATGCATATATAATTTTG	AGAAAATAACTGAAACATTATGGATGGAACACGAGCCAGATAAGAATTAATACCTGAAATCCTGCCACAAAGAGTGAACCATCAGCAGAAAACTGAGATG
311	TA	5|330-539	N/A	8|353-368|+	7|531-544|-	6|334-345|+	N/A	N/A	5|189-198|+	N/A	N/A	1.17	0.5	GTACTAGCAGGTAACCTCAAGGCTCTCCATAAACTGAAGGTATCGTAGTGATAATTAGATAAAGTGGAGGAACATTATGTAAAACTTGAGACAATATGTG	TGTTCTTACGGGCATAGGATGGACTTGGGTTGACACATGGCACATAATCTCGATTTGGAGGTGGTTTCCACAGCTTTCCAAAATCCAATGATCCACTTGC
312	TA	5|148-357	4|356-363|+	4|181-188|+	7|515-528|-	4|648-655|+	4|185-192|-	N/A	N/A	N/A	N/A	1.11	0.4	CTTTATTCTCAACTATGGATCTTGGTACCTCCAAGAAGTTGCAGAATGAAAAGAGTTCCTTCCTGGCTATGCTGAGCGACCAGCAAACTGAGAATCCATG	TTCTTTTTTAACAATTCATCGATGGTAGTAAAAACAACTTTGTCGTGTCTAGCTATATCGCAATTGGCCAATTGCATTAGTATGTGAACTAATACACAGT
313	TA	5|222-431	5|2-11|+	N/A	5|111-120|+	N/A	N/A	N/A	6|95-106|+	7|109-122|+	N/A	0.8	0.5	TCTGCTACATAATTCTGCAGCTTAAGCAAGTGATGAGACATGGGGAAAAAAAGGTGCAAATAAATAACAGTTCTTCTCAATAATTAACATACATGAAAAC	AAAGCAAAACACATGTAATAAACTCAAAAATATGACTATATAAGATCAATCACACTTCTTCTCAATATAGAATTCAGGAAAACACATATACGTCATAATA
314	TA	5|488-697	N/A	5|211-220|+	5|113-122|+	5|112-121|+	N/A	N/A	N/A	6|121-132|-	N/A	0.4	0.5	TGCTACGAGTATAAGTTCGTTCTTCAACTCGACACACCCTTGTCCCGATGTTTTGGCAAGCCTTTTAATTGCAATTTCTCTCCCATCAACTAGTTTACCC	ACAATGCAGTATTGATATGCACTCAACTTGGAAATTGATTGAAATTTAAAGTGAGAGTTATAGATTGATTACCTTGTAAACAGGTCCAAAACCACCCTCT
315	TA	6|14-225	5|267-276|-	4|98-105|-	N/A	N/A	5|401-410|-	8|60-75|+	N/A	5|321-330|-	N/A	1.26	0.4	AACTTTGGTGGTATAGTTATTGAGGAATGTGGCTTTTTGGTGTTTGGGTGAACTGGTATCTAAATTTGGTTTTGAATGTGTTATTGTATACTCCAATATG	CGCATATATTTTGTTCGATGATGTTATGATCAATAGAGGATATAACACCACTCTTTTGTGAGTTTTGGAACTGTGAAACAATCAATCACTCAAAAGTGAT
316	TA	6|9-220	6|156-167|-	N/A	N/A	5|352-361|+	N/A	N/A	5|369-378|-	5|424-433|-	N/A	0.49	0.5	GATTTGATTATGAATCCGCATGGATTTCCAAGGTAGAAATCATATGAACAAGTTGATGGAGTTAGTTTTTCTGTGATCTTTCCTTAGAGTAACTTGTTTC	CAATCCAAGCTCTGGGATGATCTCTTTCCTTCTATATTAGGCCAATATCATAAGTCAAATATGGACCTACAGTGTTACCTTGTGAGGATAGATCAAGAAT
317	TA	6|2-213	N/A	5|106-115|+	5|73-82|+	6|104-115|+	N/A	5|363-372|+	5|13-22|-	N/A	N/A	0.47	0.4	CTAAACCAACAAGAAAGCCGAAAACTTGAAGAAACTGAGTTGGTAATTTTGAATATTACGTATACTACACATATATTATATATATGTATATCCAACACTG	AAATAAAATTTTTTTATCTTGTAGATATTTTTCCCAATTATCGCATATGGACACTATTACTTGGTTTGTTTCAATATGAGAACTCAATCAATCGACATAA
318	TA	6|15-226	3|97-102|+	N/A	3|122-127|+	N/A	7|379-392|+	N/A	7|50-63|-	N/A	N/A	1.83	0.5	CAGCGAAATTTACATTCTAGATCCATTGCCACAGACCCACAGTTATCTTGAATGGGAAAAGGCTTTAACAAGGTACATAATTAATATATTTAGAATGTTT	AGTACTATGAGTTTATACATTTTATATCATCATATTTTATGTTGCAGCGCCATCAAAAAGTTTAATGCGGAAACTGGCAGAGGCAATAAAATTCCTCCAA
319	TA	6|7-218	6|98-109|-	N/A	5|582-591|-	N/A	5|200-209|-	N/A	5|100-109|+	N/A	N/A	0.49	0.5	ATTTTTTATTTGAAAAGGTATGTACTTGCCCTTTTTGTCTTACAGTAAATTGTATAGACAACAAATTTTTTGGATAGTAGTTATAGGGGGTACTATTGGT	CACTTAATTGTCATTATTCCTAACAATTCATTCTTGTTTCCTATTTCATCCAATTATCAGCGTCTTCAGAATTATATCTTCGGTAAGTAGGGACAATGCT
320	TA	6|54-265	6|169-180|-	5|632-641|+	N/A	5|193-202|-	N/A	N/A	N/A	5|124-133|-	N/A	0.49	0.5	TAGCAGTAAAGAATGCCGTTCGTCCAATTAAGCTTACAGAAGTTAAAAGATTACCACCATACACCACTTGGATTTTCTTGGATAGGTAACTTGTTTCAAC	TTCAGATCTTGATATATTTTGTGGCTTACTTTTCTTATTTATTGCTTTTCTAATTTTATCTGTTAGTGCTGTCATTATAATTCTTTCTCAGATCAATATC
321	TA	6|111-322	N/A	6|250-261|-	N/A	5|94-103|-	4|162-169|+	N/A	N/A	4|159-166|-	N/A	0.89	0.5	GACATCATGGCACAGTGTTTCCAACTAATATTACTATGCTGGTCTAAATTATATTGATAAGTGGAGAGCATCATATTCATGAACTTTCTGATAAGGATAT	TTATTCCAAACAAGTGGAATAAGAGGATAAATTCAGAGTTTATTTATGCTTGAGGGAGCAGAATCCAATCTGAGCCTAGTATATGATTAACAACTAGAAG
322	TA	6|146-357	4|210-217|-	N/A	3|183-188|-	N/A	N/A	N/A	5|236-245|+	5|493-502|-	N/A	1.02	0.5	TGAAGAGATATCAATTACGACCTAACTTGGTAAGGTCTAATAAAAGATGTAATATTCATGTTCTTATTCTTCCGAATGAATTACACCTTCTGATGTTGGC	TTCTTCTTATTCTTCAGTGATTGCATTACGTTTTTTAACGTGTAATTTTGATCAAGATTCTGAAAATACATACGCATATATATTTTTCATAAGCTAAGCA
323	TA	6|243-454	6|838-849|+	8|869-884|+	6|202-213|-	6|232-243|-	N/A	N/A	N/A	N/A	N/A	0.8	0.5	GTTGTGGTCCAACACATGTCGCCATAAAAACAGTCCATCCTACAAGATCAGACCAACACGTGTGCCAGCGCCACCAGGGGATAATTTGTCAGTCATGCAT	CTTTAGTTTTAACAGAGGATTATTCTACTTCTCTTACGAAAGATATAAGTGATCGATCTATTCCCATCTTTATGGAAGACAGAGTCCATCTATATATTAA
324	TA	6|103-314	6|217-228|+	6|149-160|-	6|436-447|-	8|126-141|-	N/A	6|119-130|-	N/A	N/A	N/A	0.75	0.4	TCTTCTAGAGTTAGTATTACAGGATACTCAGATTTGACAAAAGCATGTTGTTTGATTGATCTCAAACACTTGATGAGTTCCACTGGATTTGTTAGTGTCC	CAAGAACAATCACCAGAATCTTATATGTATATATGCATCTAAAGCTGAAAAATTCCCCAGCCATAAGATACAAGCAAACAAGTATACACAAGCTGATCAC
325	TA	6|42-253	N/A	6|702-713|+	5|223-232|-	N/A	N/A	6|660-671|+	5|276-285|-	N/A	N/A	0.49	0.5	AATGATATATTTACTATAACCAATAACCTATATCTAATATATATACACACACATAAATATTGAAACTTTATGTATATTTTTGGGTATATATGTATGTGTG	AGCTTTTCCGTGAAGAGAGATTTGGGTTTCTCGTGGGACTGAAAATGGAGAATGTGAAAGCTTTAATGGCGGTGAACAACAAGAAAGATCGAAACTTTAG
326	TA	7|4-217	4|220-227|+	N/A	9|171-188|-	4|187-194|+	8|536-551|+	8|489-504|+	N/A	4|265-272|+	N/A	2.05	0.3	CCAACTCCATTATTGATTTCTTGAAGTACCTTCTGCAACACATACAAACCATTAAAAAGTGTAATCATACATTCAATAATATTCACCAAACAGATGTGTG	TTCAGTGCAAATAAACACTGCATGGATATAAACACTACCTTAGCATTCTTTTCAACTGCTGGTTGTCCCTTTGCACCTAGCTGTGCCAACAGACTCCTGA
327	TA	7|27-240	N/A	8|505-520|-	7|302-315|+	9|204-221|-	N/A	6|481-492|-	N/A	12|378-401|+	N/A	1.95	0.4	GTCTTCACCAATTGCATGGGAAAAATAGCTAAAGCAAGACAAGCATATGTGGTGTGCATTAATCTACATCAGATTATATAACTGAACAAATTTGTCTGCG	TGTAACATTGACTAAAACAAACAAGTGATACATGATAAATACCAGCAGCAAGTATAAATGCACACATAGAAACACATGACCCTACAAAATATATGTAAAA
328	TA	7|33-246	N/A	5|345-354|+	N/A	7|294-307|+	N/A	7|206-219|+	4|1092-1099|+	N/A	N/A	1.26	0.5	TATCTACTAGACTACATCTTAAAGATTGCAAGGCAACACACTTGGTGAACCTGGACTAAGCATGTTGGCAAGATTGTCTATAACAAGTGAAATACACGCC	TGCATAACCAACATGACAGCTATAATCAACTTTCCTAAAAGTAATATTATAAATGGAGAGTTTGTAGTTAAAGAGAGTACAGAATATGCATCAATTTTCA
329	TA	7|23-236	9|254-271|-	8|355-370|-	N/A	N/A	N/A	N/A	7|112-125|+	7|591-604|-	N/A	0.8	0.5	TTAATTCCAAAATACCAGGTAATTGTAAGTTCTTGATAAAATCACTAGCTAATAGTATATTTTAGAATCTCATCATGCTGGGATTAAATATTGCAACGCC	GGTAATTAGAAGGCAGCACCAGCATAATTTTTGGAGGAGGTATAGCCACCATCTACAACAAGGTTATGACCACTGAGATATTTGGATTCATCGCTTGCAA
330	TA	7|167-380	N/A	6|141-152|+	6|260-271|-	6|90-101|-	N/A	3|488-493|-	3|132-137|-	N/A	N/A	1.57	0.4	TCCTACAGCAAAGACATATGAACCCATGATAGCTGATTTTCACAAACTTGTGAACTCCAAATTAGATGCTGCTCCTTTTATCAATGTAAGTCTTTATATC	GTTCTGTTTGTTTTAGCAAAGTGTTCAAGTCTCGTTTTGTTTTATGCTTCCCTTCCCTAATTTGATGATCACCTTCAGGTTAAAGTTCTTGTCCTATTCT
331	TA	7|155-368	N/A	9|114-131|+	N/A	9|394-411|+	9|135-152|+	N/A	N/A	10|332-351|+	N/A	0.98	0.5	TGCCAGACAAACAAATTATTGACCTATCCCAATAATCAAACGCCTTATAATACATATACAAGCAACATATGCGTATATATAATTGAATTGTGAGATTGTG	TGCGACGAACTGGAAACTTACCTGGAGAGAAGAAAGCCAGTTTTGGGAGGAAGAAAACTGGCAACCACAAATCTCCCGATCTCTAGAGAGAGATTTGATC
332	TA	7|1490-1703	7|403-416|+	N/A	N/A	8|152-167|-	N/A	N/A	7|140-153|-	8|156-171|-	N/A	0.49	0.5	TTGGTCACTGCTCAGATATCGATTTTCTACTTGATGCTTTGTAACTAATGGTCCTCAGATAACTGACAGTGCTACACTCGCTCATAATATTACAGTTCTT	ACTATTTTTAAAGAGGGTGGGGGTAAGGAGTTAGTCACGCATTGGGCACCTTACCAGTTACCACTAGGCCAACTCGACTCATTAAAAATCACGAGTCCAT
333	TA	8|23-238	8|685-700|+	N/A	4|737-744|-	N/A	4|293-300|+	4|307-314|-	4|115-122|+	N/A	N/A	1.89	0.4	TGGTCCATCAATGAAGGACTGGAGAGGTGGAAGAGCTGCTTCCTTCAACATTATTCCCAGTAGCACCGGAGCTGCCAAGGTTAAACATAGTTATTACATG	CAGTATATCAGCACTAGTCGAAACTTGACTAGCAATCAGCTTTGTTTATGTCGTAATTACCTTGTACATTTCTATTACATAGCAAGTTCATCATGTATGA
334	TA	8|338-553	5|395-404|-	N/A	5|193-202|+	5|227-236|-	5|174-183|-	N/A	N/A	N/A	N/A	1.2	0.5	CCATATGGGTTCGAAAAGAGCTAGTTAAACATATTGGCCATCTCAGAGTTGATAGTGTTGGCAGAGGAATTATGGGATGTCTCGGTAACAAGGTTAGTGT	GATTATAATTCACAAAGCATTAGTAGTGTCATCAAGATACTCTTTTTTTTATCAAAACATATAATTCAAATGTGGATGTCATTACATTGCAGGGTTGTAT
335	TA	9|167-384	9|787-804|+	12|298-321|+	N/A	N/A	7|106-119|-	10|140-159|+	N/A	N/A	N/A	1.62	0.5	CTTACTGAGAATTCATCTATGCCATCTATACTCGCCTTAATTTCATGTTAGCATAAATTTCCAAAGTCTCATTGTGTATTGCAACTATTGTTGCAATTTT	AATGAGGATGAGTACTTTTATACTAATGATATTATGCATGCCAGGGTTTTATGTTCATGTATAATGTGATAGTTTATCATCTAAATTTCTGTTTTCCAAG
336	TA	9|495-712	N/A	10|229-248|-	8|116-131|-	6|144-155|-	N/A	N/A	10|197-216|-	N/A	N/A	1.5	0.5	AAGCCATGGGTAAGATTGGATGCTAGTAGGCCTTGTCCACTTGATGCTCTTTGGGCTCCTTATGATCTTTTAAAACCTCCATTTTCTTTTGATTCTTGAG	TGAACAAGAAAATGAAGAAGAAGATTGATTATGTTTAAATTGTGAACTTAGGATTTGATTTAGATGATCAAATTAAAGGTGGTGAAAGTGTATAGGCTCT
337	TA	9|432-649	N/A	6|246-257|-	7|163-176|-	11|225-246|+	N/A	N/A	9|458-475|-	N/A	N/A	1.74	0.5	CTGTGACAAACTTTTGGTGATGTTAAAAGCAACAGATGTAAATTTAGGGAATAAACAAGACACAAATTTACATAGAAATTCCTACAAAATGCCTGCATAC	TCACTTTGACTGCAGGAAAACCATCAAAAGAGAAGGCTTTGATGCAGAGGTTAGATTTTCTGCTCCAGTGTAACATCATTGATCCCCATCCAAGTTTTAG
338	TAA	4|113-324	N/A	4|168-179|+	4|214-225|+	2|139-144|-	N/A	N/A	2|19-24|-	4|104-115|-	N/A	0.94	0.4	GAAAAGACGTGCCGAGGCAGCCGATATTGCCAAATCACAGGTAAATACTTTCTAAGTATTAATATAAACATTTTTTAGGCATTAATAACTTTTTTGTATG	CCTATCACCTTTCTATAGTTCCTTGCTACAGTTTCCCATGAGATCAGGACCCCGATGAATGGTGTGCTAGGTAAGCTTTAGATCGCCTCCATATCCATTT
339	TAA	4|173-384	4|123-134|+	N/A	4|190-201|-	N/A	N/A	N/A	N/A	4|97-108|-	2|268-273|-	0.8	0.5	TAGGGGAATGAAGCCAAGCACATTCATATTGAGAGAGTAAAGGCAAGCATAATAAATCACTGAGCACCCCACAAACAAGAAAAAGAATTTCACGGGTTAC	CAAGAAAGAACCATTTAGCAAAAAGACAGAGATAAACAGCCTCATCACCATGTGTTTGAATAATATAAAACCATATATCAATCTTGTCCCCTTCTTAACC
340	TAACA	3|41-255	3|177-191|-	N/A	N/A	3|218-232|-	2|267-276|-	N/A	N/A	3|330-344|-	N/A	0.4	0.5	GATAAATGGTTGTCATTATATATCTATGATGATATGAATTGTCATGAATAGTTAATACATGTAGTATATTATATATAAAGATAAGTCAATGAATTAAATC	ACCAATAACAATGTGATCAGCCATCTTAAACTATTTATAATATAAGTTTCTCACTAGTCAAAGTATTCTCAACTTTGTCTACCGAATGCTTATACATCAA
341	TAAT	3|247-458	N/A	2|178-185|+	N/A	N/A	2|125-132|-	2|169-176|+	3|178-189|-	3|106-117|+	N/A	0.5	0.4	AAATTAGTAATTGATTCAAATTTATATCTTTCACAATATATAATGAAAAAGAATGACGATAATTAAGAAAAGAAAGAGTCAAGTATATATACACACACGA	AAATAACTTTCTACCTCTAAAAATTAGAAATTGTGTAATTAAAATAAATGTTAATAACAAATATGATGAGGTAGATTCCCAATTTTTTTGACCCAAAACC
342	TAC	4|2-213	4|739-750|-	N/A	4|169-180|+	N/A	3|135-143|+	2|373-378|-	N/A	N/A	N/A	0.8	0.5	CTCCAACTGTACATTTTGCCTAAATGTATATGACAAACAAGATGCTAGCTAGAGAGAGTGATTTAAGTAATTAATTTGAAATGATACATTATGCATCCAA	TCTATGTTTGTGTCTAATTGTGTATCTGCACTTAGTCAAATGTGGTGATGAATGCATATTATCGACGTTTCTAGCAACCTTTTGCAATATCTGGATTACA
343	TACA	3|24-235	2|164-171|-	3|124-135|+	2|634-641|+	N/A	N/A	N/A	N/A	2|119-126|-	N/A	0.49	0.5	TTCAAGCTTGGTCATTACATGAAGATTCCACCAAAAGCAATGTTTAAGGCTCAAGTAAGTTACACAAATATAAACAACTATTTTCATTCAGATTTTCTCG	TCTGAGACTTTATGTTTTCATGTAATTTTGAGGTGTATGGCACTGTATTATCAGTACTGGCATACGTATGCACCGCTTGGTGGATGATGGAAAACATTCC
344	TAG	4|15-226	N/A	N/A	4|215-226|-	N/A	N/A	3|112-120|+	4|278-289|+	5|168-182|+	N/A	0.63	0.5	GTATGCAAAGTTGATTTGAATCTTTGGCAGGGGTTGGTTAGAGAAAGGAATCATATTACAACTGGGGAGAAACTTTACTTTCTGTTAAAATGATTAATAC	TGTATATACAAGAAAGAAAGCTGTACTGCTCACTTTTCTTTCTGGTGATAAACAGAAATTGCAAAGGGTAGTGTGGGTCCATCTTTTTATTATTATATGT
345	TAGA	3|299-510	3|523-534|+	3|498-509|-	3|494-505|+	N/A	N/A	2|98-105|+	3|292-303|-	3|218-229|+	N/A	0.35	0.3	AGGGAAAAAAGTGTAGTCAAGTCACCACCCTTTCTGACTAGCAAGCCAAAATTTATAACTACTAAAGCATATTAGATTTCAGTTTTTATGCAAGTAATAT	AGGAACTACGCAACATAGCATACCTTTCCATTTTGGGAATCCACAAGCAACGCATCAAGGTCATCTCCTACAACGGCAAGAATTTTGCTGTCTGGGCTCA
346	TAGG	3|9-220	N/A	2|226-233|+	3|188-199|-	N/A	N/A	N/A	2|690-697|+	2|383-390|+	N/A	0.49	0.5	ATTCGGGAGCCAGGTATCCCCTGAAGAACCAAAGGCGTATCATGATTAAACAAGCCAGAAAGTAATAACTCATGTATCTGTTCTATATACAAAAGTACAT	CAAGACTAACTATAATATACGCAGAGAAAGATCAATGGGAGTCTTGCTTACATTGTTCCAGCCACGCGAGTGCTAATATGTGTGACATTGTCAGGAAAAA
347	TAT	4|64-275	N/A	N/A	4|350-361|-	N/A	4|107-118|-	N/A	5|167-181|-	4|217-228|-	N/A	0.4	0.5	AAACACTCAACCATTATGATGGACTAGTAAAAATAAAATGTCTCCTGATTTTTCTCAATGTACCTGTATTCAAGTAAAATTTACTAGTTTCTTGATAGTA	CATCATAGTGACATTTTAACTTATTAATCATATCTCCTAACATGTTAAGGCACCCTTTGAAGGGTTAGTTGCGTTAATTTGCATTGTCAGTATTGTCTAG
348	TAT	6|42-259	4|305-316|-	5|148-162|-	4|206-217|+	N/A	N/A	4|341-352|+	N/A	N/A	N/A	0.8	0.5	TTAGTTTCTTTAGTAAATTCTGTTGTAACTATCTACTTGAATTTTTACTTCATTTTCTGGCAATATCATTGCAGATTGTATAAGAAAGTTTCCATAGTTA	TAATTCTAAAATGATACTGTCTTTCACTCATTCTCACCCTAGCATGCTTTTTTGGACTATGTCCCGACATATAGTCCACCATTAAATTGTGTATCCCTTT
349	TATT	3|143-354	3|340-351|+	2|129-136|-	3|604-615|+	N/A	N/A	N/A	3|170-181|+	N/A	N/A	0.4	0.5	GTTTCAATCACAAAACTAAACTATTATAGGAAAAGGATACGGTAAAGCATCATTTGCAGGATCCAAATTGATGACAGCAACCTTCCTGCAAGCAAACAAC	TACAAATAGAAAAGCTTTATCCTTAAATGCATATAAGCAAATTAGCTAAACATCATCAAATATTGCACTTTACAATCCAAAATATTTTAAACTGATATGC
350	TATT	3|168-379	N/A	3|415-426|-	N/A	2|203-210|-	N/A	N/A	3|162-173|-	3|171-182|-	N/A	0.4	0.5	ACCGCTGCAGCATCACCGCCACCATCAGCAGTAGGATCTTGAGCATCACTGACAAAAATTGTGAAAGAAAATAGTAACATGATAAAAAATGTTACACTCA	TAATATTGAATATCTTAATTTGTGAGGATGTAATTTTTTAATGTTCATTGTTTGATACAAAGGTGGGATATGTAAGAAGTAGACATTGTTCCAGTAAATG
351	TATT	4|294-509	N/A	N/A	2|365-372|+	N/A	N/A	4|119-134|-	4|105-120|+	2|5-12|-	N/A	0.98	0.5	TAACTGCACAGAATTCACATGATTATATGTTTCTGATGTTAAAATTATATATTTTATCTATCCATTTATTCTTTTATATCTTATGACCTCATGAATTGTG	ACTAATTGATGCTTTGCTAACACATGTAATGGCATTCGTTCCAGATAATTCTCCTTGTAATATTAAGCCTCTAACTTGGTCTGTGCAACCACTGCAATCT
352	TC	5|111-320	5|514-523|-	5|211-220|-	3|653-658|+	N/A	N/A	5|287-296|+	N/A	N/A	N/A	0.8	0.5	CTTTTCGGAGCACTGTCAAAGATTTCCTTAGCTACCTCAATTCGTCCACATTTGGAATACATGTCTATCAGTGCCGAAGACAAAATGTAATTGTGTTTAA	AACCATCAGGTTATGTATCCACTTAGCATGACCAAGAGCCCCCGTCCGTGCACATGCTGTTATAATGGATGCAAATGTAAATCCATCAGGCTCAAATTTT
353	TC	5|164-373	N/A	3|131-136|-	4|126-133|-	5|176-185|-	5|763-772|-	5|113-122|-	3|178-183|-	N/A	N/A	0.88	0.3	TTTTAGGGATATCAGGTGGTAACAATGGTTCTACCTCAGATATGTCCCAAAACTCCTCCCCTCTGATGGCCTCAATTGAATGCCTATATGAATCTAGATA	CTGTACCAGACAGATACATAATCAATTGGATGCTCCCTTCTGTCATGAATGGCTGCAATTGCATGTGCACATGGTATGCCTGTCAAGTCATAAACTCTAC
354	TC	5|194-403	5|330-339|-	N/A	5|407-416|+	5|200-209|+	N/A	4|198-205|+	N/A	N/A	N/A	0.4	0.5	AAACTTCTCAAATATAGTTATTGGGAGCGCTTGGACAAATAAATCTCTGGTGTATCATTTGTTGAGTTGTGTAGTTATCTTCATAAAAGTTGGTAGAGCT	TGAATAGACAACAATTTTGTCGTTCTATATCGAATTTCCAACATTAGCCATATACATATTTGACCATCCTAATGAGTTGCCAATGTCACAATATAGTTAT
355	TC	5|143-352	5|676-685|+	2|3-6|-	5|228-237|-	N/A	N/A	5|236-245|+	N/A	N/A	N/A	1.2	0.5	GATTCGGGGCAAGGACAAGCAACTTCTGGCACTTCTTATGGTTCAGGTATATAGCTATCATATTTGGAGAGAAAGGAATTCTAGAGCTCACGATAAGGGT	CTACTCAGATCTTTGGTGGCATTCTAACTGATGTTATTGCTAGATTGCAGGGTTCTAATTTTTTATCTAGTCTTGAATGTAGTAGGCCTGACTTGTGTTC
356	TC	5|60-269	5|115-124|+	N/A	3|157-162|-	5|227-236|-	N/A	5|160-169|-	5|94-103|+	5|355-364|+	N/A	0.7	0.3	ACCTTCTTCAACTATCACTACTGGTGATAAAGAACTCCCAAACCCTGCTTATCAAACATGGATTCGTCAGGACAATCTTCTTCTTGGGGCTCTTGTAGGA	CTCCTCTTGTTCCTCTTATTTCTCAAGCTACAACCTCAAAAGAAATCTGGGACATCTTAGCTAAAACTTATGCGAAGCCCAGTAGAGGCCACATCAAACA
357	TC	5|99-308	N/A	3|441-446|+	3|133-138|-	N/A	N/A	5|160-169|+	2|59-62|+	N/A	N/A	1.2	0.5	TACTCTTTTAAATCTCTTACATAATCGTCTCATATAGGGTGACAACAAAGGGTTTCTTGTGTGCAAGAAAAAGATGGCAACCTCCCCAGAAGCTCTTTGT	CTTCACCATTTAGAGAATTTGTTGAATGTGTAGTAAATTTGAAGTTTGATGAGAAGCCCAACTATGCAAAATATGTTTCCCTATTTGTTGGAATAGTGGG
358	TC	5|606-815	N/A	N/A	5|1102-1111|-	5|139-148|+	3|488-493|-	N/A	5|611-620|-	N/A	N/A	0.8	0.5	TCAGATCATGGAAGCAGGTGCACTTGATATTCTCACTGAGAGAATCTCCCAGTGTTTATCAGAATATAATCAGGTATCCACCTTTGCAGTTTGTTTGTTA	ACACACATTCTGATAGTGTTTGTTTGTGTATGTATATAGATAATATTGATCATGCTTGCATATATGTGATCAGACTTCTGATGAACATTATATTTGTTGG
359	TC	7|284-497	6|177-188|-	7|457-470|-	6|227-238|+	7|728-741|+	N/A	N/A	N/A	N/A	N/A	0.49	0.5	ATCGGCTGCCACACTTCTCACACACGTATATTAAAACAGTTTTCATTCCCTCTGTACTCTCTAGACTTTCTCTCTATCCCTTCCCCCTCCCCTGCGCTCT	TAATGATCTAAGATTTCAACAGTACTGCATTAGTGAAATGCAGCACGATATTCAGTTGAGTACAACTTATTGCACATATGAGAGGCATAAATTAGTAGAA
360	TC	8|9-224	9|214-231|-	6|153-164|-	9|117-134|-	N/A	N/A	N/A	8|150-165|+	N/A	N/A	1.1	0.5	ATACGGTACTTGTTATAATCAATTGCTAATATACGGTTTTTCTTATTAAAATTTTCAAAAATACGGTTTAACTTAGAAATCAGTTATCGCTCTCTTTCTT	CCACATCTCCGATTCAGATTTCCGACGCCGCTGGCGAGCTTCATCGCCATCTCCGATTCAGATTCCGGCGGCGTAGGGAGCTTCATTGATTTGGGTATGT
361	TC	8|64-279	6|263-274|+	N/A	N/A	9|258-275|+	N/A	N/A	10|337-356|-	6|113-124|+	N/A	1.6	0.5	ATTTCTTTTGCTCAGCTCTTTTTCACCAGGCTGTGAATAACCAGATTCATTTTATATGACCCCATCTCTCGCACACCTTAAATTATCTGTATCTCTCAAG	AAATATCTCTCCCTTTCTATGAAGCTCTGATACCAAATGTTAAATGCAAACTACTGATGATGTAAAGTTATGACTTGTTCATTGAATGAAACTAGAAGCT
362	TCA	4|395-606	4|385-396|+	N/A	4|337-348|+	2|404-409|-	N/A	N/A	N/A	5|183-197|+	N/A	0.98	0.5	AGAAGAAAGCAGTGCAATTGCTTGAGGACCAGATGGTACAGCCTCATTTTGCTTTTCCAAAGCTAGTTTTCTAGCTCTTTCTAAAGATTTACGGAGTTCG	CCAAAAACTGTGTTGTCATCATCCTCCACTGGTCGTAAGGTAGTATGATGCTCCAAACGAAGTGCTTTTGAAGCTTCTTCAGCTCTCGCATAAGCTGATT
363	TCA	4|712-923	4|175-186|+	4|147-158|-	4|122-133|+	N/A	N/A	3|131-139|-	N/A	4|138-149|+	N/A	0.37	0.4	ACCTTCAGTTTGATAGTCTTGATCCACAACATAAGACAAATCCTTTGACCTATTATGCTTTTTAGGGTTATCTTTTTCCTCATTGTTATCGTCAACTTCC	GAGTTCAACTCTTCAATAATTGGGCCTTTAGATTTGTTTATGTGCGAAGATGTTCCTTCACAAAATTCTGATGGTTGCATGTTCATTGAAGGAATATCGG
364	TCA	5|117-331	5|280-294|-	N/A	5|172-186|-	5|120-134|-	N/A	N/A	4|152-163|+	4|194-205|-	N/A	0.47	0.4	ACTGTCACTATAGACATCACTATTGACTGAACCAATCTCTGTATCATCTTGGTCATATTCAGAAGAACTACCAAGAATAATCTCGTTGTCATCACCACTG	TGTTCCTCTTGTTGCAACAACTCAACCCCAGGCACATTGCTAGGAATATTGACCTCACCGTATGCTTTTGGCTTTGCCTTTGGATTTATAGGACGGCCAC
365	TCC	4|67-278	3|148-156|-	N/A	4|160-171|-	N/A	2|336-341|-	4|571-582|+	N/A	4|126-137|-	N/A	0.76	0.4	CCAGTTCTGCAAACAGTTTCCTTTATGCTGCTGCATTTTCTCATACTGGAAAGAGTGAGAACCTTATTGAAGGATGGGATCTCGTGGAGCATCCAACTTT	ATCAGAAACAGAGGATGTTGAGCACTGGACTCGAGCCATGTTTATTGATGCAACAAAATACAAGAAGTGATTTGTGCTTCAGTATGGTAGTCTGTAAGTA
366	TCC	5|418-632	4|178-189|+	N/A	N/A	N/A	5|103-117|+	6|334-351|+	N/A	4|122-133|+	N/A	0.75	0.5	ATGATCGATAAAATGCATAATATGAAGTATGCTAACTTACCAAAAATGTTAGAAATTTGCCTAAGGCCTTTCAAAAGGCCCTTCATTCTTGTCCCCATTG	TCTATAAGAAATGCAATCTTGTTGGCTGAAAGTCTACCCCTACCACTTGAATTGGGAGGGAACTTTCAACTTCACCTCAGATCATTGCCTGATCATAAGG
367	TCT	4|5-216	2|127-132|-	N/A	2|176-181|-	2|233-238|-	N/A	N/A	2|230-235|-	N/A	N/A	0.8	0.5	ATCATTTTGACTAATGAAGAAAAGATGAGAAATTTTGGTAGTTGTATAAATTCTTAACTATAATTATAGTATCTACTTGGCCTGGTCATGAATTATATTA	GCACTGCATCATATATCATATGCATTGGATCTTTTGAAATTAATATATGTTTTGGTTAAAGTCTAACCAAAAACCCAACAATTAGCTTCTTTTTTAATCC
368	TCT	4|102-313	4|152-163|+	4|107-118|-	4|601-612|-	N/A	N/A	5|172-186|-	N/A	N/A	N/A	0.4	0.5	TGCCAAGTCTGCGCCACTCATAACAAAGGCAATAAGAATCTTTAAGGTCTCATAATCATCTTCAACTTCACTCTCCGAAAATGGAAGCAACAGCTCATCG	AGTACACATTGCGCTACTTTCATTGGCGCTTTCATCTTTCTATCGTTGATTTGTTTTGTTCTCTTCTTAAGTGGTATATCATCTTCAGCATCTGTCTTTG
369	TCT	5|55-269	3|239-247|-	5|106-120|-	5|1042-1056|-	N/A	N/A	N/A	5|164-178|-	N/A	N/A	0.8	0.5	TTTAAAGTTAATGAGTAATAATAACTCTACACTTTACCTTCAATGCCTTCTTCAATATTTTCAAGTGCGTGTATTTGTGTTGAAGCCTCCCTGCTCTTTG	CCTTTGACTTCCCTTTCTTGGTCTTCTTTCTAGATGAACAACAGCAGCAAAACCATTTTGGTAAACAGTTGCAAGTTTTTCCTGGGGCTTTCTTTTTAAC
370	TCTT	3|1306-1517	N/A	N/A	2|189-196|-	N/A	N/A	2|341-348|-	2|772-779|-	2|185-192|+	N/A	0.4	0.5	GATTCTGCTGCACCATAATATATAGCTTCCCGAGTTACAACCTCTGTAAGAGCATGAATTCCTAACTGTCTTATGAAAACAGAAATCTTCGTCTGTAGCG	CTTCACTTAATTCACCAAAGTAGAGAAATTCGATATTGTTGCAATGCTTAAATTCCTTTCTTAACTTCTCATCATCACTCCAACATACAAGGCCAAACGA
371	TG	12|147-370	N/A	14|184-211|+	N/A	10|185-204|+	N/A	9|218-235|+	N/A	10|259-278|-	N/A	1.79	0.5	GAACTTGTTACAGTATTACTTAGAATGTGGATCACTGTTAATGATGAATCAAACTCAGTAACATGTAATGCACATTGTATGTTTTATGGCTGTGTATATT	AGCGCATGTACGCACTCAAGGATTCATTTCCCTTAATGCAGATAGACCTATCGACTACTATTTCATTGCATCCTTGCTTTTTATTTATAAAATATTTTTT
372	TG	5|5-214	N/A	N/A	N/A	6|257-268|-	6|728-739|+	6|136-147|-	N/A	5|360-369|+	N/A	0.49	0.5	TAGACTTTTGAAGCGTAAGACCTGTACGGAAAGCATTGGCTTGTGATTGCGTCAGAGTTGAGGAAGCTACGGAAGCTATAGCCATCTGGATTCTACTCTA	TTCTCATCTGGATTCAACTCTGTGTATATCTGTGTATATTTGTGAAGAAGCGTTCGTTGGAGAAGAAGCGGAGGCCGGCGGCGTGGGACATGGAGGAGTC
373	TG	5|6-215	5|235-244|+	N/A	N/A	5|160-169|+	N/A	4|267-274|-	N/A	5|141-150|+	N/A	0.4	0.5	GTTAGACCACATACAATGTGTTTGTATGCAATAAACACAAATTAACATTACATAAACCACTGGAAGAATATACAAAACACATATTAGAAACAACTGTGTC	GAATTGTGGATAAATACATTTCATTTATGTAATTCAATGTTGACAAATACATCATAGACATCAAGTGCACATATATGAAATTGAGTCATACTATACAGAG
374	TG	5|5-214	6|232-243|-	N/A	5|336-345|-	7|432-445|-	8|233-248|-	N/A	N/A	N/A	N/A	1.17	0.5	TCTTTCAGCTCTTTGATTGGAACAGAAAGTTTGCAAAAAAGAAGTTTTTTCAGAACAAGCTTCTTCCTCTAGGTCAGCTCTCTGTACCTTTTCTCTATAT	TTTGAGATCTTTTTTCTAGTTTATATTGTGGGAACTGAGAAAGAAATGTAATATTGTTGTTAGCTTCTGCAAAAACAGGTTCTAAGAAGTTTGGAGCTGA
375	TG	5|28-237	5|508-517|+	4|373-380|-	N/A	N/A	N/A	6|221-232|+	6|224-235|-	N/A	N/A	0.75	0.5	GATGACTGAGCTTTTGAGCATGATTGAGTTTAGAGCCATTAGCGAGGTGTGTGACTTGCATGAGAATAAAGCAGACAACTCAATGGAGCTCTTTGTTTTC	TAAGTGTAATTGTACTCAATTGCTAAAACCATAATTGCAGCACACTCATACTTAAACAAAATGAATGTCTAAGGTGGCATTGCATTATTGGTGCTAGGAC
376	TG	5|37-246	5|107-116|+	5|378-387|+	5|110-119|-	N/A	N/A	N/A	4|115-122|+	4|140-147|+	N/A	0.47	0.4	AGAGTTGGATCTTTATATTGCTCATGTATGATTTTGTTGAATTATGGTTGACATCTTTGTCTTATAACTTGATTTTTGTTGCATTGTTGTATATCTTCTC	TATTGGTAAAAATGAAACTAAGTTAAAGGCTGTTAAAGATATGCTTCTATTACGATATTTTCAACGGGCAAGCTAGTGGGACCCGCCATTACTATTTAGA
377	TG	5|16-225	5|466-475|+	3|471-476|+	N/A	N/A	5|378-387|-	N/A	N/A	5|472-481|+	N/A	0.8	0.5	ATGGAGGAGCGAGTATGGAACTGACACTATACTGGAGGTACACCCAAAGACATCCCACTGCCCTTTGATTCAAACATGGATAGTGCCCTTGTGGTCAAAT	TTTCTTTTCTTTTTGAGGTAAATGTTTTGTTGCTTTTAAGTTTTAACATTATACTTGGATTATAATAACATATATAAAAAATAAAAAAACACTTTAGTCA
378	TG	5|72-281	5|365-374|-	5|159-168|+	6|123-134|+	5|213-222|-	N/A	N/A	N/A	N/A	N/A	0.4	0.5	CTGCAATTTACCAAACACAACATGGTCAAGGTAAATACATAATTTTAGGACAAAAACAACAATAACACAAAATTCTTCACATGGGTAATATGTAAGTCTC	TTTTTTCACATACTTGATTGGAAGCACAACTGAACCAAGCATCCCAAGCAGAACCACCATGCCAAAAAAACTTTTTGACATTAAACATAGAAGTATCTCC
379	TG	5|132-341	N/A	5|337-346|+	4|97-104|-	N/A	4|595-602|-	N/A	3|378-383|+	N/A	N/A	0.75	0.5	TTGTTCTTTGTTTTTGCACTAGTTGTCATCCAACAATATTGTATCTCATTATTTTGAATTCGATTATTCTAACTACCACTACCTAATATCGGAATATAAC	TTTACATATTCACCTTTTTTTGGCAGATACACTTCAATTAGATTTCTGATTCTCTTTTGGCCTAGAAGTCAACTAACATCGAAATACCTCACATAATGAT
380	TG	5|111-320	4|604-611|-	N/A	4|457-464|+	4|72-79|-	N/A	N/A	4|18-25|-	N/A	N/A	0.4	0.5	GTAGGTGAATGATGATAAAGTGCTACTTTGCATTATATAGCACAACCCAGTGTTGTGACAACAATCTAATTATGTTTCATTTCCTTCCTTTTTATTAATT	TTATCATTATGATAAAATGTGTGTGTAGTCTACGTTTTCATCTTGCGGATCAACATGTCACTTGCAGTTCGATCTTCAAAATGTAATCATATCATGTCAC
381	TG	5|121-330	7|302-315|+	N/A	6|318-329|+	7|421-434|-	N/A	4|346-353|+	N/A	7|91-104|+	N/A	1.15	0.4	GCATCACTGGCACTCAGAATTTTTTCAAATAATGGAATGATGGTAGAATTTGAGCTACAAACATATCAGTCAAGGAAATGCTACACTAATGGATATAACA	TAAGTTTTGTGTACATTTTATAATATTCACAATAGAAGAAATAGGAAGATTGTGGATACTCTCCAGATATTTGCTGCAACTCTTGCTCTGTTATTCTGGG
382	TG	5|336-545	N/A	N/A	4|554-561|+	N/A	4|136-143|+	4|152-159|+	N/A	4|112-119|+	N/A	0.4	0.5	GTTTAGAACACTTTGGTTTGATTAGAAAATACAAAGACAAGAAATTTGTTTGCACAAAGTTCAGATCATAAAGCTAACTAGCTAAGTATTGTGGACTCCA	TATACAGATCTGAGGGTATGAAACATGAAACATTATCAAATGACTTCATACCGTGATAAAGTTGCCACAGTTCTGTCCTTCAGAGCGAAGGTAATTGTTA
383	TG	5|20-229	7|112-125|-	5|249-258|+	N/A	5|228-237|-	N/A	N/A	5|100-109|+	5|149-158|-	N/A	0.75	0.4	CACAGGAAGAGTTTGATAATCTGTGCTTCGAATTCGGTATAGAGCTCGATGATGTGGTGAGTCCTGTTTATATGAGTATGAATGCTGTTTTTTTTTCTTT	TATGTATAGGTTTGTTTGATTATGTAATTGTTATGTAGACTACTGAAAAGGCAATCATAAGAAAAGAGAAACACATAGATGAAGCTGTAGCAGGTGATGA
384	TG	5|580-789	4|126-133|-	5|106-115|-	N/A	N/A	5|106-115|-	N/A	N/A	4|254-261|-	N/A	0.49	0.5	CACCCCATACCTTGCCTCTTCTTCGCGTATTCTTCTTGTTGCTTCGGTGCCATTCATGACAGGCATCTGACAATCAAACAGTTAAAAGCATTGTCAGATA	TCTGTACTGTGTGTGCATGTCAATGTTAGCATTTTGCAGATTATTAAGAAGTGAAAGTTGACTACTTGAACAACAGTAAAGAGATGCAGTGTGTGTAATT
385	TG	5|368-577	N/A	N/A	6|213-224|-	N/A	5|275-284|-	5|263-272|+	4|240-247|+	N/A	N/A	0.63	0.5	ACACCATAGAAGAGGTCAGCATTGTGCTTCCTTGTACAGATCACTCTCTCTCCTGTTCCTGCACTTAATCAAACGTATGGGTTCACTTTGTTTGTGCTTT	TTATGGAGATCTTTGAAATGTCAGGTGTTGAATACTTGAATCATATTATTTATCTTTTTTCATGGAACAGGTGAGGCAGTGTACCAAACTTTTCTTACAT
386	TG	5|569-778	5|342-351|-	7|180-193|+	N/A	6|256-267|+	5|190-199|-	N/A	5|232-241|+	6|595-606|-	N/A	0.73	0.3	TATGGGAATCTCTTTGAAGTTTCTCGAAAATATGTTCCTCCAATTCGCCCTGTTGGTCGTGGCGCATATGGCATCGTTTGGTAATATTTCTCCACCAAGT	AACTTTTGATATATGTTGGGTTTGATTTTTATATGATTATTAGAATGATTTGATTGAATGAGTCTTGGAGAATATGTGGGGTTATGTTTGCAAACTTGAC
387	TG	5|1067-1276	3|174-179|-	5|261-270|-	N/A	N/A	3|433-438|-	3|240-245|-	3|186-191|-	N/A	N/A	0.94	0.4	AACACCAGTGCTTTCCTGGTAACTTAGCACACAGTTTGTTGAGAACCATAAAAGTTGGTCTAGAGTTTCGAATTTGATCAAAATGACCCTGTTTTAGGGC	GCCTTATAGGTGACTTTTTAACTTATAATTAATTAAATAAGTACCAAAAAGTTAAGTCAAATTAAGTTACGACTTAAGATTGACTTATAAGTTGAATTTT
388	TG	6|6-217	4|186-193|-	4|579-586|+	4|401-408|+	N/A	N/A	N/A	N/A	5|274-283|-	N/A	0.8	0.5	ATTCTGCAATCAGTACTTGTAGAGTTTCATAGTATTAATCTTCCAATGGAAGTCTAATCTTCAAAGCAATAATTGCTTCTTTAATTTGAACATTTGTACA	GGTGTAAATCACAATTTTCTTTGATGTGGTCAATTAATTAGCTGTCGTGGGGTCTGCAAACAAGGTGTTTCACATCAGAATTCAAATCCATTGTTCTTTA
389	TG	6|5-216	6|567-578|-	N/A	6|153-164|-	N/A	6|149-160|+	N/A	8|217-232|-	N/A	N/A	0.8	0.5	TTTTAATTTCATCTGCTGAATTACAGAATAAAACTACTGTACTAGTGATAGAAGATGTAACCAGAAGAAAAAACATATCATCTAATGATATAAAGAGCAA	TAATACATGGTAATGTTGACCAATATGGCAACTACATTTTGAAGAATAACACAGATTCAGATGTGTTTCTAGCCAACTACAGCCTCTCGTGTATACTAAG
390	TG	6|16-227	N/A	5|307-316|-	6|170-181|-	4|254-261|-	N/A	N/A	4|380-387|+	5|236-245|-	N/A	0.82	0.4	GGTGCCTCACACTCATGATGATGTTGGATGGTTGAAAACTATAGATCAATACTATGTTGGCTCTAATAACTCCATACAAGTTTGTAATTTCTACTGAAAT	TTGTTTTGTGGTTTTTGATGTTCAATTATGGTTTCTTGATTGATCCTGAATTATGTGTATGTGTGCAACTATTGGACTAATGTTGATGGTTGTGACTTGT
391	TG	6|20-231	6|371-382|-	N/A	N/A	6|233-244|-	6|266-277|-	N/A	7|304-317|+	N/A	N/A	0.4	0.5	CACTTTACCTGAAAGTTGTATAAACGGTTATTATCTATCAGATGTCTAATTATTTATAAGCAACTAATAATCAATACATCTAATTTCTCACACATTTGTT	TAGAGAGTACCTGTGCCAGACAAATCAGGCAACGTTTTTATACAATTCCATTCAGACTTGACATTGGCAACTTGGTATACTCTGCAGCAATTGGATGACA
392	TG	6|25-236	5|190-199|-	7|148-161|+	N/A	5|200-209|+	N/A	N/A	6|271-282|-	N/A	N/A	0.75	0.5	AGGTGCGTCTGGTATCAATACTGGATGATTACAGAGTTACAAGAAAACAAAAAGAGGAGGCTAAGAAGCGATACAAGGTAAAAGTTTTATTTTATATGCA	CAGTTCCTTCCAGACTTGGAATGTTATGGGGAAACTGTAACAGGTGGTGGAAATGGCGAAAGGCGTGAGCATTTTTAAAAAAGCATTATAGAATTATGAT
393	TG	6|180-391	N/A	6|281-292|+	5|207-216|+	5|307-316|-	5|270-279|-	N/A	5|169-178|-	N/A	N/A	0.47	0.4	GTAACCCAGAAACGAAAAAGAAACTGGCAAAGATGCATGATCTTGCTAATATATAACCTATGATGCTGATTCTATGCAAATAAAACTACATATATGTATA	TAATTATAAATTTATAATGGAATAGAATTAGAGAGAGAATAGTCGAGTTTAGTAACTTACAGAAAGACTAGAAGAAAAGAGCCAGGATTTGAGAAGCAGG
394	TG	6|281-492	9|253-270|+	N/A	N/A	5|99-108|+	N/A	3|393-398|+	6|471-482|+	N/A	N/A	1.94	0.5	GCAGAGTCTGTAAAACTTCTGCTGTGTTATTGAGTAGTCCAATCCATTTCAGAATGTTGATTTGTATCAAAGTTTTTTGTTTGCATCTTGGTTCAAAATA	CTTTGTTTGATGTACAATGGGGTCTTCTTAAGTCTTGGCAACAGTGATATTGAATTATAAGGCAAGGATCTTAACTAAAGAATATAGGTACATACTTGTA
395	TG	6|465-676	N/A	N/A	5|148-157|+	N/A	6|818-829|+	6|112-123|+	6|111-122|-	N/A	N/A	0.4	0.5	ACACCTTGGCTCTTCCATAGCATTTTAAGACCCCATCATCAACTAAACAATATAATTACTTATGAGCTTTGTATTTTTGAATAAATTAGCCCATATAACA	AGAGACGGAAGAAATTAAGGGCATTACCCAAGTCCTGAAACTTGAGGAATTCTAATAGAGGTAATATTAGTAGATCGTGGAGTGTGTTTATGGTATCACA
396	TG	6|101-312	6|1594-1605|-	N/A	N/A	7|115-128|+	9|203-220|+	6|690-701|+	N/A	N/A	N/A	1.17	0.5	GAAACCAGTAAATCTTAGGCCAGGCGTCAATCACATAACTTTGCTGTGCATGACATTAGGTATCCAGGTAACTATATATCAATTCCCAACTCCAGTTATT	TAAAACTTTACACCGAGAAAGAAGTTAAGCAGGAGATGACAAAATGCAAGTTACTTTGTCTTAATCAATGTAGAACAGCGGAGCTCACATGGAGAAGAGA
397	TG	7|24-237	7|121-134|-	N/A	N/A	8|537-552|+	N/A	7|94-107|-	8|96-111|-	N/A	N/A	0.49	0.5	ATTACAGCATTTTCGTAAAATAAATACAAATTTTGGTGTTCTTCAGTTTGATCAAAAAACACTCAAATTGAGTACCTCTAAACTTTTTTCTTTTTTAGGT	ACAAAGTACTAGACATAGCAGAAATAATGAAAACAGGAAACACAAACCAGAATTTATATATCTGTGATTATGATTTTCTCATGATTGATAATTGTCTGTC
398	TG	7|114-327	N/A	6|220-231|-	7|133-146|+	N/A	4|94-101|+	N/A	N/A	6|217-228|+	N/A	1.1	0.5	TGATTCTTCTTGTTTCTCCCATCATCTTCACCTCATCTGCTCATGATCCTAGATGGGCAGCCAAAAGGAAGCGCATGAGTCACAAAGTTCGGGACATGTA	TAATTGAGATATGATTGTGATTACATATGGTTTTGAGTTGCAATCTGGGGCAACTATAGAGGGTTGATTGCAATTTTATTTATAATTGTTTGTATCAGGT
399	TG	7|25-238	6|207-218|-	6|590-601|-	N/A	6|108-119|-	N/A	N/A	4|115-122|+	N/A	N/A	0.98	0.5	CCAAAATAACATTATTTGTGGAACCATGGACCAATATACTCGCACATCTTAAATATGTGTAACAATAATAAATGACCCTCCTTTGCAGAAGCCAAAACCT	TCACACATTGCTCGACTGTGTAATAGTTATCACTCAAATGAGCAATGGCTGCCAGTGGTGAGCAACAAAACATATATTTCCAAAAAGCACAACAATCCTT
400	TG	7|125-338	6|264-275|-	9|244-261|+	N/A	6|375-386|+	7|537-550|+	N/A	N/A	N/A	N/A	1.1	0.5	GGACCAAGCTATACATCTCTAACTTGGATTATGGTGTTACTAATGAAGACATCAAGGTTATCTTGTTTTTCCCTCTCTTTTTTTCCGCTATTTGGTCTAA	TAACTTGACTGTGTTAGCAAACAAAAAAAATAAAAATATATCATGTTTTGAGCTTTGGCTGATATATACAGTTGATAGGTTTTTTGAGTTTGGGCCTCAT
401	TG	7|115-328	7|169-182|+	N/A	6|452-463|-	7|338-351|+	7|272-285|+	N/A	7|147-160|+	N/A	N/A	0.37	0.4	TTAATTAATCAATAAAAAGAACAAGAAAAATCTTAAAAGATGGATTATAATAGATACGCATGGCATGCATAAGATTCTCCACATGCTTTTGAGTTGTTTA	GTGTTTAGCATAACTGCGTGGTAGCTTTTCTTTGACTCAATTAAATAACTAATGGTGCTTAAGCCAATGCATGTTGTTTACCATGTCTTTTCCGACAGCT
402	TG	7|397-610	6|382-393|-	N/A	6|285-296|+	6|564-575|-	5|99-108|+	6|512-523|-	5|204-213|-	N/A	N/A	0.64	0.3	CCACCCGAGATGTCCCTGTAGTGTTTACTGATGTTAAACAACTATATGCTCTTCGAATTATTAATGTAAATTTTGCTATCAACTTCGACCTGCAACAGTT	TATTTGCTTCATTGTCTATCTGTCGAGGGAACGTCGTGGTATCTACTGCTAATAAATAATTATTTCCCTCAGATACAATGGTGAGGCAGGCCTCAATGGT
403	TG	8|46-261	5|583-592|+	8|298-313|-	9|136-153|+	N/A	N/A	9|175-192|-	7|650-663|-	10|264-283|+	N/A	1.51	0.3	CCTAATAGTTTTGCTGCTTTGAATATCCATACTTTTTTTTCGTAATACCTCCTGAGCGATTCCACTTTAGCTTCCCAATTTGGGAAAAATCAGTTTTTCA	TTATGATTATTATTTCTTTTTGAGTATTGTTCCCCTAACTATACCTTCTGACACAGGTTGGGCAGCTGCCATGGATGCATACAATGATCCTTCTGTCGAT
404	TG	8|223-438	N/A	7|94-107|-	N/A	N/A	8|129-144|-	N/A	8|110-125|-	8|584-599|+	N/A	0.4	0.5	AGCCAAGATTCTGATTCAATGCCGCGTGTGTGGACGGGAAATGAAGACATTAGGGCAATTACCAAAACAGCTCGCTCTGCAGTATGACATCCTTTGATTA	GGGTTGTGGTATACAGTATAGTTATATACTAATCTCCACTTTGTTTCAGTCACTGAAAATGCTTTCTGTTATGGCTGCACTGCGTTTGGACGATGACAAG
405	TG	8|243-458	8|550-565|-	7|156-169|+	8|423-438|+	6|118-129|-	N/A	N/A	N/A	N/A	N/A	0.8	0.5	TTGACAAATTTGAACAAAATCAAGAACATAAACAAACTCAGTAGGCTCATGAATTGGTATACGATTTCATATAAACGGTCTCGTATCTCACTTTTTACAA	TAATATATATTACACAACCATTTATCAGTGTACAAGTGTTCGGTATTTTGTCCTCCAATGTTAATACACTGACATGTTTCAGGTTATAAAGATAACTAAT
406	TG	9|1202-1419	7|1017-1030|-	7|315-328|+	7|405-418|-	N/A	5|326-335|-	N/A	8|104-119|-	N/A	N/A	1.21	0.4	TAGTGTGTTAGATTGATATATGTTGTATTTGCACATTCATTCCCCCACTACCTTTACATATTCCTGATCAAAGAATATTTGAGTTTTGTAGCAATGGTGA	TACTGGTTTTCCAGTGCTGCTGATTAATTGAATGATTCTGGGGACTAGGGATTTATGAGTCAGAGTATCTTAATAAATTACCATATACTATAATTGAATA
407	TGA	4|62-273	N/A	N/A	4|126-137|-	4|154-165|-	4|131-142|+	N/A	2|273-278|-	4|479-490|+	N/A	0.75	0.4	CTTCAAAAACAAGAGAAAAATTAGTTAGCTATTATTTCAATGTGCTCGTTCTTCGACGTAGAAGTTATCAGAATCGCGTGACTCCAAAAAATATAGACAG	AACAGAATTTGGATCTATTGGGGATAGTGCTTACTTTGAAGGAAAAAACCATGCTACAGAATTTGATTTACCTGAATGCTCTCTGAATATGCAGTATGTT
408	TGA	4|41-252	2|297-302|+	N/A	6|639-656|-	2|176-181|+	N/A	N/A	N/A	4|224-235|+	N/A	1.5	0.5	ATGCTTCAAATGCTTCCCTGACATTATTTGCAAGGTCACAATAGACACCATTTTTTCCTGGAAAAAGTATTACCGTCTAAGACAACTTGCATTAACAACT	ACTTATGAGAAAGGAAGTAAAAATACCAAGCTTGCGTATTGGTATTAGGTTGCGACCCTTTCTGCGCATCTCGCTTGCTTCTTCTAGTGTTAGACCCTCT
409	TGA	4|978-1189	2|346-351|+	4|156-167|+	3|218-226|+	N/A	N/A	N/A	2|55-60|-	N/A	N/A	0.89	0.5	TGCTTGAACTTCTCTCTAAGCTATGAAACACAATTTTTCCTGATGAATTCATTCGTGGACTATCTAACGAGACTTCATGCCGTGGTGGTGCATTTGTTGT	TGTGTTGTTGTTATCTACTTGTCTCCGCATTGGAGTTTTGCTAATTTTGGCTTCTCTGTGCTTCACCAATCTAATTCTAGGTGGTGGATTGTGGTTTGAA
410	TGA	6|456-673	N/A	6|160-177|-	N/A	6|134-151|-	3|196-204|+	N/A	N/A	3|115-123|-	N/A	1.47	0.5	TTGTTGATGAGTACTCTCTTCTTTTATAGGTTTTATTTGATTATCACTCAACTTATTAAGAAGGGGCAAACATCGAATCCCTCCATCGTCTTCTTTTTCT	TGGCGATGATAGTGTTGATAATAAAGTGGAAACTTCAAGAAATCACTCATGGTGTTTGAAAAGTGATGATCAACACTTACATGTTGAGTTGATATGGTAG
411	TGAAGA	3|209-426	2|615-626|-	2|173-184|-	2|94-105|+	2|177-188|+	N/A	N/A	2|659-670|-	N/A	2|237-248|-	0.35	0.3	TGGGGTTCAATGAAGAGTCTTCTCAAGTAGGACTAGAGCTCATAGATTGCAAAGAAGAAAGTGAACTAGGTAATTCTTATCAAGAAAACAGAGTTAAAGT	AGTACAAGCTGCTATCACAGCTTGCGGTTTCGATTCTGAGGTGGATATGTCAAGAGAATCATTTGATTGGAACTTTAGTTTTGAATCTCCGTTGGTCGAA
412	TGC	4|267-478	4|112-123|+	N/A	4|214-225|-	4|237-248|-	2|277-282|+	N/A	N/A	N/A	N/A	0.8	0.5	AAACACAGATGCCTACACGGTAACAGTAACACGCACGACTCCACTTTTCCGCAGTTTCTGCACAACCGATTACGACTCGTCTTCCTCGATTCAATGCGAT	TTGCACTGTAATCATCATCCTCATTATCAAATCTCATCTTCTTTCCGGCGACTTTACTAATCTTTTCGTCGTTGTAATTGCTGCCGCAACAAGACTCAGC
413	TGCA	3|6-217	3|231-242|-	2|261-268|-	3|1150-1161|-	N/A	2|194-201|-	N/A	2|231-238|+	2|108-115|-	N/A	0.49	0.3	TTGTTGAACTTAATGTTTTATTATTGTTATTACAAATCCTAAAAATAATCTTAAATGCGTGATCCAGTGTTTATTGTCACTAGAATGCTGATTGTTTAAT	TATTTTGCTGTCTTATTTTCAGAGAGTGTGGATTAGCACATAAAACAGTTATATTTATACTGGATGAGTTCGACATCTTTGCACAGGTAACAGTGCACCT
414	TGCT	3|335-546	2|127-134|-	N/A	3|261-272|-	3|116-127|+	N/A	N/A	N/A	3|129-140|+	N/A	0.4	0.5	CACTACTATTATTATCTTTGGCTCAGGGACTGGTGAAACGTATAAATTCTCAGAGAAAGCAATACTATGAATTTGATTGGTATCTGCCGGAAAGCGTGCC	ACACTCTCTGGAGACGATCATAATTCATGATTTTTTTGGGAAGAATTGTGAGATAGATTTGGTGGAGTATCTGCTCGAAAATGCGAAAGTTTTAAAACAG
415	TGG	5|107-321	2|369-374|-	2|102-107|-	5|629-643|-	N/A	N/A	5|232-246|+	4|178-189|-	N/A	N/A	1.34	0.4	TAGTCCACGCTCACAGGTGCATCTTGGCTGCTAGGAGTCTCTTCTTTAGGAAATTCTTTTGTGGGTCGGAGACTCCAGCTGGTCTTGACGCCTCCTCCGC	TTCGAGGTCAGCTAGTGGCGGCGCGTTGGCATCATCGCCTAGAGGTGGACCGAACTCACAAGTCATACCTGTGAACTCGGTTGGGTACGAGGTGTTTTTG
416	TGT	4|311-522	N/A	N/A	4|493-504|-	4|270-281|+	N/A	N/A	4|143-154|-	4|400-411|-	3|177-185|-	0.37	0.4	CCCAACCATGAAGGAATAATGCCTGATAGTCTATTATCTCCTAAATCAAGTGTTTGCAAATTTGACAAGTTCTTGAAAGAAATTGGAATCTCCCCGGAAA	TGAGGTGCAATGACTGCAGCTGCAATAACCGACTTAAAGAGCTTGGCAATTGTCCGGAAAGATTGTTGTAGCCAAGGTCTAGGACCTTTAGGTAAGAACA
417	TGT	4|337-548	N/A	2|71-76|+	2|628-633|-	N/A	N/A	N/A	2|63-68|-	2|78-83|-	N/A	0.8	0.5	ATGATTCGAGGATGGTTGCGTCGGGTGATCTGTTTGCGTGTTGTGTTGGGAAGAAAACTGATGGGCATATGTATCTAAGTGAGGCTGATAGGAGAGAGGC	GGCAAGTAAGGAGATAGATATAGAAGATACATTGGGGTGTAAGGCTTTGGTTATCGTTGAAGACACAAGTGCAGTGATTGCAGCGTTATCTGCGTCATTT
418	TGTA	3|76-287	3|872-883|-	3|148-159|+	N/A	3|133-144|+	N/A	2|546-553|+	N/A	N/A	N/A	0.4	0.5	ATTCAAGATTATATTCTGTCAGTTGTTGTATACTCCATCAAATTGATTACTGCAATTATTTCTATATTGAAATGACCATATTTTACTTTCACAAAGGTTG	AACTTAAACTACCAATTATATGTTTTACCTTTATAAGCTTTTATAGTGGTTCTGCTACAGTTTGGTAAAAAAAGTCACCCAGAATGTGCTCGGTTTTCAC
419	TGTT	3|61-272	N/A	2|92-99|-	2|292-299|+	2|166-173|-	N/A	N/A	3|142-153|-	N/A	N/A	0.49	0.5	ACAAAATTTATGGTTAAGCTCCTGAAAAGTGGTGGGGTTCCTTGCCTTGTTCAAGAAACTTGATAGTTGTGAAGTACTATCATTATACAATAACTATCTC	TCCATATGCTTAAAATGGTTCAACCACAATTGGATGAAGGACAGCTTATAAGCATTTTTCTCTTTTGTTACCGCAAAATTGATTGGACACTATGCAGTTT
420	TTAA	3|150-361	3|155-166|-	N/A	3|352-363|+	3|93-104|-	N/A	2|117-124|-	N/A	N/A	N/A	0.4	0.5	AAAACTCTTAGCAATTAAGAGGCTACAAGAAAATGAATTCAATGGCCAGAATGGTGTTAATTATGAAGAAAGGCACAGGTAGAGAGCAAAGAATATTGTT	CTGAAGGGTTCATTACATTTATGAGGAGATATCTTGTCTTTTTCATCTAATTATCTGAACTACAAACCTACATATCAACATGATTAATCACTATAGACAA
421	TTAT	3|93-304	2|419-426|-	2|207-214|-	2|539-546|+	N/A	3|187-198|-	2|129-136|+	N/A	N/A	N/A	0.47	0.4	GATTATATACAATTACGTTACCAATGTGTGTGGTATTGGGTAAGTTTTACAACTCACTTTAACCTGAAATCCACAGCTGACCAAACAGGGTTAGGTTATC	TAGTATCATTCTAATGAACCATTAATAAGAAAGTAGTAACATGATCGTAATTTAGTTTGGTCAGCCTTTATATGTTTTTTCCCTCCCTTCTGTTTTTGGC
422	TTAT	3|146-357	N/A	N/A	N/A	3|204-215|-	3|286-297|-	2|126-133|+	2|69-76|+	N/A	N/A	0.49	0.5	CTTCTTATTCACCGTTGTTTACGAGTGTATATTATGTAAGCACAATGAGTGTTGTTGTTGATGTAGTAACAAAAGCTGGTATCGTGTAATATATTATAGC	AATATAAAAGTATTGTAAGTACAAAGTGTGCATATATTTGTGATCATGTAATAAAAACAAAATTCGCCCCTTGTCTTTTCATTCTGCATATATTTGTGAT
423	TTAT	3|497-708	3|116-127|+	N/A	3|430-441|-	N/A	N/A	N/A	3|160-171|+	2|148-155|+	N/A	0.4	0.5	AACATTATATATAGTATACTATACAATATTATTAAAGCCGAATACGAGTATAATTTGTACTTTAAACTAAACTTCTGTAGTTTTATAACTCTAATTAATA	TGTTCTTATGTTAGTCTATTCATAGTTTAATACAATATGTACTGCTATTGCATAGTTTAATTATGTACTCCTTTGTTGTATTCAGGCTACAGGATGCTAA
424	TTC	4|131-342	4|612-623|-	4|141-152|-	2|159-164|+	N/A	N/A	N/A	N/A	4|181-192|+	N/A	0.8	0.5	CCAACACTCTCACTCCAGGGCTTTTGTTAATTCAAGTAACTACCTCAAAGAATGAAGAATACACTAGTTTGTAAAAGTATGCAAATGACCCAATTTTTGT	TACTACTTCTTTGTTCTTTCATGAAAATTGAGTCTTCAATGTCTGATTCTGACAAGATCACACAATTACCTGGCCAACCTCAAGTGGGGTTTCAACAATT
425	TTC	4|361-572	2|61-66|+	2|115-120|+	N/A	4|244-255|-	N/A	N/A	N/A	2|4-9|+	N/A	0.98	0.5	AATGACGATGGCCGCTCATATGATTACTTGCACCTGTATCCATATACCATGTGGTCTCATTCTCTAAAGTTACTCCTTTATTTGCACTTAATAACATATT	CTTAATCACCAAACTTTTACCTTCTTCACTCTTCTTGTTATGCCAGCAATCTTTTGAGATGTGTCCCATTTTTCCACAAGTATAACATTCTCTGCCTTGG
426	TTCTT	3|125-339	N/A	N/A	2|410-419|+	N/A	3|377-391|-	N/A	2|109-118|-	3|190-204|+	N/A	0.49	0.5	TCTGAGGTGTTTATATCAAATATCTCAGGCTTATGTGTTTGAGAACAGGTGTACACATATAAATAGAAGTTTCATATTATGCTAAGGTGTTTTCATGACA	ATCTGTTTATGTATACAAATGTTCTTTTCCCAGGCTTTATGGCAGCTATTGTGGTTGAATCCGCCCATGCCTGCCAACGTAGCAAAGTCTGTCACAAATA
427	TTG	4|139-350	3|328-336|-	4|121-132|+	3|343-351|+	4|257-268|+	N/A	N/A	4|517-528|-	N/A	N/A	0.47	0.4	ATTATTTATTCATACAATGATAAGATTCGTCCACTTTTGGATGCCATTGACAAGCTCAGAAACTTGAAGGTGATGCAGGAAGGCATTCAACTCCCAACCA	GTGATCAATCTTCTGGGAAATCTAGTGTTCTTGAGTCCCTGGCTGGGATAAGTTTGCCACGTGGACAGGGTATTTGTACAAGGGTCCCACTCATAATGAG
428	TTG	4|136-347	N/A	N/A	3|639-647|-	N/A	3|241-249|+	3|166-174|-	3|110-118|+	N/A	N/A	0.4	0.5	GTGGTGCAGATAAAAATGACGGTGTAGTTTGGTAGTCGTAGTAGTATAATCCAGCAGCAGGTGGAGGTTTAAGCTTCTGTGGATGATGAGTTGAGTGAAA	ATGATCAAATGTTTGATGTTTGTGATTCATCACCTTGGGAACACCAGGTCGGATCTCCCACTTGAATGGTATGGATCCTGGTGTCACAAATGATTCATCA
429	TTG	5|5-219	5|115-129|+	4|1072-1083|+	5|186-200|-	5|526-540|-	N/A	5|235-249|+	N/A	3|353-361|-	N/A	0.73	0.3	CTTATAATATTTTAGTTATACAACATCTATACTATTATTGACTAAATAATATCAGTTTTACTTCGTTGTGTTGCTTGTCCTCTATATGCACCTGATAATT	ATAATTTTAGGTCCGAAATTCCCATAAGCTGAAGGAGATTATGAGTAGAATATTATTCTTGAGAAATACTTTAAACCAAGGAACAGCCAGGGGTAAGAAT
430	TTGG	3|82-293	2|436-443|-	3|254-265|+	2|550-557|-	2|123-130|+	N/A	N/A	N/A	N/A	N/A	0.49	0.5	AAATTTCCAGACTAGAATGTAACAGTTCTGTATTGTTCATAGCAAAGGTTATATGATTGTAGAGTTCTAGTGCTAGGAGAGGATCGATATGATTATACTA	TTCTTACTCATTGACTTACTGCTCACAATTGTGAAAGGAAACTACTAACTTTATATGAAGATATATACAAATGCTAATGATATATTATTTTTGGAAAATT
431	TTGTG	3|29-243	3|103-117|-	3|498-512|+	3|117-131|+	N/A	N/A	3|166-180|-	3|281-295|+	N/A	2|240-249|+	0.35	0.3	GGTGAATGAGGCCCATATGGTTCTTCCTTATGAAGCCTTGCCTAGTTTCAGAGATGTTCCAAACTCAGAAAAGCAAAATTTATTCATTAAAAAGCTGAAT	TTTGACTTTACTGACCCAACAAAGCAACTAAAAGAAAAGGACATCAAACGACAGACTTTAGTAGAGCTTGTTGATTACGTTACTTCTGCAAATGGAAATT
432	TTTAT	3|56-270	N/A	N/A	2|330-339|+	2|208-217|+	N/A	2|1698-1707|-	2|247-256|+	2|302-311|+	N/A	0.37	0.4	GTTGTATAGCTGATGAAGGGTTAAGGAATCGTCTCTAAGTTCACTGGCAATTAGTTTATTACATGACAAGTGAACTCACACCTGTCTCTTTTATGTTTTA	TTTTGCAAAGCAGAGTCATGTTTTGAACAAGCATAATCAACATATTATAACATCTTTAAACATTGACTACCAACAAAAATACTTTTTAGAATATGATCGT
433	TTTG	3|18-229	3|1266-1277|-	2|104-111|+	N/A	2|101-108|+	2|147-154|-	N/A	N/A	N/A	N/A	0.49	0.5	AATTAATTTCAGGTTTGTATTTGATATGTAGAAGGGGTCATGTGATTTAATTTATCTGCTAATGCTATTTGGTGCATATTTGTTTTTGCTTGCTTATTGA	TCCATCGCTGATCAACAAGATTACAGACTACTTGTTTTGGTAACTCTATGAATTGTTCTTGCAGGAGATGAAACAAGAGATAAAATGAATGGCTGCTATT
434	TTTG	3|128-339	N/A	N/A	2|233-240|-	3|217-228|-	N/A	N/A	2|136-143|-	2|198-205|+	N/A	0.49	0.5	CGAGTATGTCTGCCTGCAGTCCTGAGTTCCAAGGTTAGTCAAATTTGTTTTATTCGAGTTAGTATCTTTGGATATAAAAAGTTATGTAACTTATACGAAT	TGCAGATATCAAAGTGGAAGAAAGCCAATTTGATATTTCTTTTTTTCCTTTTAAGGAAATTGATTCTTCCGTTTTACTCCTTTACGCTATTTTGTGTCAT
435	TTTG	3|217-428	3|188-199|-	N/A	3|1327-1338|+	2|300-307|+	N/A	N/A	N/A	3|257-268|-	N/A	0.4	0.5	AGAAGCAGGAGGAAGCCAAGTTGGGGGATTCAATGGGAGGTGGAGATGATATCGAGAAACTACTTGATAGCTGCTCTGAGTATGTTTACCATTATTATTT	TTACATTATGCTTTTATAATACAATCTGATTAGGCCATGACTTGTTTATTTAGTAATTCCGCCTATCACATGTACTTTCAGCTTTATCATATTTTTGCAA
436	TTTG	5|56-275	N/A	4|113-128|+	5|144-163|-	N/A	5|94-113|-	4|289-304|+	N/A	N/A	N/A	0.49	0.5	CTTGAAGCTGCATCCTCCAAATCTTATCAGACAAAACCCTCGAGAAGCGCAAATGCCTCTTTCAAGAATTGTCATCAGGGTGTAAAGTTAGGGCAAGCAT	TTTTGCGGTGATTATGCCAGAGAAATGCTATTCACACCGGAGTTTTGAAAGGCTGTCACTTGAGCGTACTTGGATAGTTAGGCTGTAATTACCTAACGAA
437	TTTGAT	3|382-599	3|306-323|+	3|227-244|-	N/A	N/A	N/A	3|204-221|+	N/A	2|537-548|+	N/A	0.4	0.5	CTTAGATTTCTTCAATTTGTTATTGCAATTAGTATTTAATTATTGTTAACCTAGATTATGTGAGATTATCATCAGTGTGTTGTGTTTGATTTCATAATAA	TTTTATGTCTAGATGGTATGATGATCAAGGATTAATGATCCGAATCGATATAGGATTAATTTGATTCTCCTAGTAATGTGTTTGTAATTACAACTGTGTT
438	TTTTA	3|43-257	N/A	3|118-132|+	2|297-306|+	N/A	N/A	3|360-374|-	N/A	3|209-223|-	N/A	0.4	0.5	GAACAGCTTCTAGTGTTGATTACATGCGCAAACAGGAGCTAATTGATGCTGCTGAAGCAAGTGGACTCTCTCGTGCCCCAATTATGTAAGTTGCAGAACT	AACTTTCTATCTTTTTCTTGGTCATTTTGATTGTTGGACTGATGTTTTCAAAATGGACACTTTATGCTCCAAGGCCAGAAAAGGGAAAAGGGAAACTCGG
